# Supplementary material for: Synthesis of 1,2-oxazetidines with a free –NH group via photoredox catalysis
Source: Royal Society of Chemistry journal article supplement (doi:10.1039/d2cc02892a), 2022-01-01

## SUPPORTING INFORMATION

### Synthesis of 1,2-oxazetidines with free -NH group via photoredox catalysis

Majid Ahmad Ganie,<sup>ab</sup> Muneer-Ul-Shafi Bhat,<sup>ab</sup> Masood Ahmad Rizvi,<sup>c</sup> Shabnam Raheem,<sup>c</sup> and Bhahwal Ali Shah<sup>\*ab</sup>

<sup>a</sup>Academy of Scientific and Industrial Research (AcSIR), Ghaziabad-201002, India.

<sup>b</sup>Natural Product & Medicinal Chemistry, CSIR-Indian Institute of Integrative Medicine, Jammu-180001.

<sup>c</sup>Department of Chemistry, University of Kashmir, Srinagar, 190006.

### Table of contents

|                                                                                                                                                                  |          |
|------------------------------------------------------------------------------------------------------------------------------------------------------------------|----------|
| 1. General Information                                                                                                                                           | S1       |
| 2. Synthesis Procedure: Synthesis of substituted Oxazetidines                                                                                                    | S2       |
| 3. Optimisation Table                                                                                                                                            | S2       |
| 3. Photoredox studies: Luminescence quenching experiments, Absorption Studies, Stern-Volmer plots, control experiments, LCMS analysis, and alternative mechanism | S3-S9    |
| 4. Determination of quantum yield.                                                                                                                               | S9- S13  |
| 5. Characterization data (1-35)                                                                                                                                  | S14- S25 |
| 6. NMR spectra                                                                                                                                                   | S25-S68  |

### 1. General information

All reactions were carried out in oven-dried glassware. The solvents used were purified by distillation. All reactions were irradiated using a blue light-emitting diode (LED)s purchased from the market (Manufacturer: GM Modular, Model: Zodion 5050SMD; 60 LEDs per meter, 14 Lumens per LED, 12V strip Light at 460 nm). <sup>1</sup>H and <sup>13</sup>C NMR spectra were recorded on FT-NMR 500 and 400 MHz instruments. Chemical data for protons are reported in parts per million (ppm) downfield from tetramethylsilane and are referenced to the residual proton in the NMR solvent (CDCl<sub>3</sub>, 7.26 ppm). Carbon nuclear magnetic resonance spectra (<sup>13</sup>C NMR) were recorded at 125 MHz or 100 MHz: chemical data for carbons are reported in parts per million (ppm,  $\delta$  scale) downfield from tetramethylsilane and are referenced to the carbon resonance of the solvent. <sup>19</sup>F NMR spectra are not calibrated by an internal reference. Coupling constants (*J*) are quoted in Hz. Mass spectra were obtained by using Q-TOF-LC/MS spectrometer using electron spray ionization.

**Note: Institutional Publication Number : CSIR-IIIM/IPR/00434**

## 2. Synthesis of substituted oxazetidines

To an oven-dried 30 ml glass vial, containing starting compounds Ru(bpy)<sub>3</sub>Cl<sub>2</sub> (2 mol%), alkyne (0.98 mmol) in CH<sub>3</sub>CN, was added trimethylsilyl azide (1.17 mmol), thiophenol (0.98 mmol) and trifluoroacetic acid (0.98 mmol) with continuous stirring under air. The reaction mixture was then irradiated under blue light sourced from blue LED strips (40 mW/cm<sup>2</sup> at 460 nm). After the completion of the reaction, as monitored by TLC, the reaction mixture was extracted with ethyl acetate and water. The aqueous layers were then washed with sodium bicarbonate (NaHCO<sub>3</sub>) and again extracted with ethyl acetate. The combined organic layers were dried over Na<sub>2</sub>SO<sub>4</sub> and concentrated under a vacuum. The crude mixture was purified by silica gel column chromatography to obtain product **1** as a yellow color oil (161 mg, 66% yield) using hexane/ethyl acetate as a solvent system.

### 3. Table S1. Optimization of Reaction Conditions<sup>a</sup>

We initiated our investigations by irradiating a mixture of phenylacetylene **a** (1 mmol), TMSN<sub>3</sub> **b** (1.2 mmol), and thiophenol **c** (1 mmol) as model substrates in the presence of Ru(bpy)<sub>3</sub>Cl<sub>2</sub> as photocatalyst in CH<sub>3</sub>CN under blue LEDs (Table 1, entry 1). The reaction led to the formation of oxazetidine **1** in 66% yields.

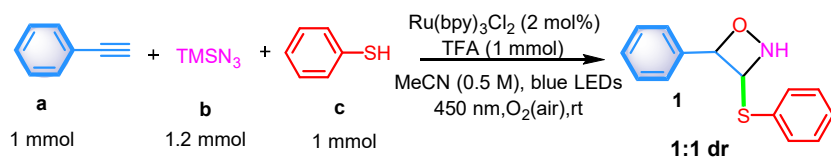

| entry | Deviation from standard conditions                                                                | Yield (%) <b>1</b> |
|-------|---------------------------------------------------------------------------------------------------|--------------------|
| 1     | none                                                                                              | 66                 |
| 2     | Eosin-Y instead of Ru(bpy) <sub>3</sub> Cl <sub>2</sub>                                           | 20                 |
| 3     | Mes-Acr <sup>+</sup> BF <sub>4</sub> <sup>-</sup> instead of Ru(bpy) <sub>3</sub> Cl <sub>2</sub> | 5                  |
| 4     | Rose-Bengal instead of Ru(bpy) <sub>3</sub> Cl <sub>2</sub>                                       | traces             |
| 5     | CH <sub>3</sub> OH, DMF, THF instead of ACN                                                       | traces             |
| 6     | DMSO, DCE instead of ACN                                                                          | n.d                |
| 7     | no photocatalyst, light, or TFA                                                                   | n.d.               |

<sup>a</sup>Reaction conditions: phenylacetylene (1 mmol), thiophenol (1 mmol), TMSN<sub>3</sub> (1.2 mmol), TFA (1 mmol), photocatalyst (2 mol%), ACN (2ml), Blue LEDs, 12h.

Furthermore, the reaction in the presence of different photocatalysts eosin-Y, mesityl acridinium tetrafluoroborate (Mes-Acr<sup>+</sup> BF<sub>4</sub><sup>-</sup>), and Rose-Bengal gave the product in lower yields (Table 1, entries 2-4). The change of solvent to CH<sub>3</sub>OH, DMF, and THF led to the drop in the yields, and there was no product formation in DMSO and DCE (Table 1, entry 6). Besides, traces of the

product were observed in the absence of TFA, photocatalyst, and light, thereby highlighting their importance (Table 1, entry 7). Moreover, among the various acids screened TFA gave the best results.

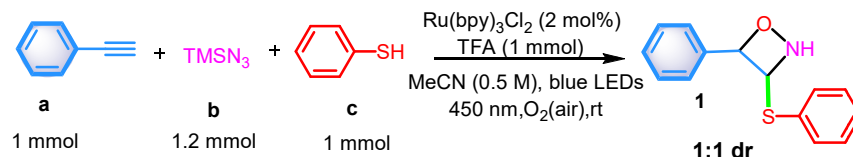

| Entry | Acids                             | Equiv. | Yields% |
|-------|-----------------------------------|--------|---------|
| 1     | CF <sub>3</sub> COOH              | 1      | 66      |
| 2     | HCOOH                             | -      | 55      |
| 3     | CH <sub>3</sub> COOH              | -      | 30      |
| 4     | CF <sub>3</sub> SO <sub>3</sub> H | -      | 20      |
| 5     | HCl                               | -      | traces  |
| 6     | H <sub>2</sub> SO <sub>4</sub>    | -      | traces  |

<sup>a</sup>Reaction conditions: phenylacetylene (1 mmol), thiophenol (1 mmol), TMSN<sub>3</sub> (1.2 mmol), TFA (1 mmol), photocatalyst (2 mol%), ACN (2ml), Blue LEDs, 12h

### 3. Photoredox Studies

The relative tendency of reactants towards the SET reaction of [Ru(bpy)<sub>3</sub>]Cl<sub>2</sub> photocatalyst were examined (Figure S1). The [Ru(bpy)<sub>3</sub>]Cl<sub>2</sub> fluorescence quenching and corresponding Stern–Volmer plots depict reactant quenching in the order thiophenol (PSH) > phenylacetylene (PA) > TMS azide (Fig S2)

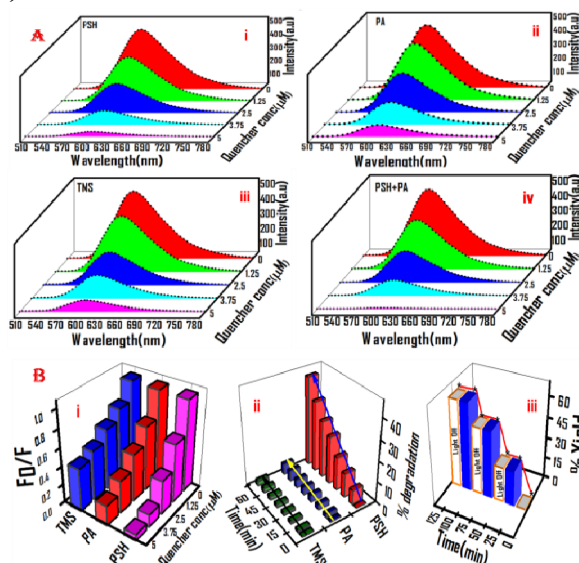

**Figure S1.** Photoredox studies: (A) fluorescence quenching studies of [Ru(bpy)<sub>3</sub>]Cl<sub>2</sub> with reactants, (B) relative Stern-Volmer plots, absorption studies, and light on-off experiments

### 3.1. Luminescence Studies:

Fluorescence quenching studies were carried out using a fixed amount of  $[\text{Ru}(\text{bpy})_3]\text{Cl}_2$  and variable concentrations of reactants in MeCN at room temperature. The solutions were irradiated with blue LEDs light and the luminescence was measured at  $\lambda = 552 \text{ nm}$  corresponding to the maximum emission wavelength of  $[\text{Ru}(\text{bpy})_3]\text{Cl}_2$  photocatalyst. Stern Volmer analysis of Fluorescence quenching data was attempted to calculate comparative quenching constants Figure S1 and the calculated values are summarized in Table S2. The calculated quenching constants were in good agreement with absorption results and further confirm thiophenol to be an effective reagent for starting a single electron transfer reaction with photoexcited  $[\text{Ru}(\text{bpy})_3]\text{Cl}_2$  catalyst. To observe the effect of other reaction ingredients on thiophenol quenching of  $[\text{Ru}(\text{bpy})_3]\text{Cl}_2$  catalyst, the approach of a ternary quenching system i.e.  $\text{Ru}(\text{bpy})_3\text{Cl}_2 + \text{PSH} + \text{reactant}$  was designed. Among such ternary systems,  $\text{Ru}(\text{bpy})_3\text{Cl}_2 + \text{PSH} + \text{PA}$ , showed positive feedback towards quenching thereby supporting the sequence of proposed mechanistic steps for the synthetic methodology.

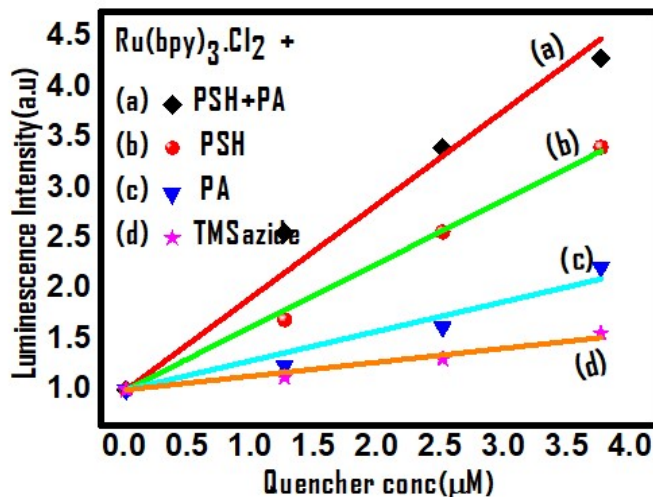

**Figure S2.** Comparative Stern Volmer plots for Luminescence quenching of photocatalyst with reactant combinations.

### 3.2. Absorption Studies:

Time-dependent absorption changes were monitored by adding uniform concentrations of thiophenol(PSH), phenylacetylene(PA), and trimethyl sodium azide(TMS) to the fixed concentration of photocatalyst  $[\text{Ru}(\text{bpy})_3]\text{Cl}_2$  in MeCN at room temperature. All these binary mixtures were kept under blue LED irradiation for 70 minutes and absorbances were recorded after every 10 minutes. Figure S2. The relative degradation data of  $[\text{Ru}(\text{bpy})_3]\text{Cl}_2$  by thiophenol(PSH), phenylacetylene(PA) and trimethyl sodium azide(TMS) solved in first order kinetics with the calculated first-order rate constant in the order: thiophenol > phenylacetylene > trimethyl sodium azide(TMS). This observed kinetic order can be corroborated with the relative propensity of reaction ingredients towards single electron transfer reaction with photoexcited  $[\text{Ru}(\text{bpy})_3]\text{Cl}_2$ . From the data analysis of table S1 it can be seen that thiophenol is a major

reagent for such a single electron transfer reaction with excited photoexcited  $[\text{Ru}(\text{bpy})_3]\text{Cl}_2$  catalyst.

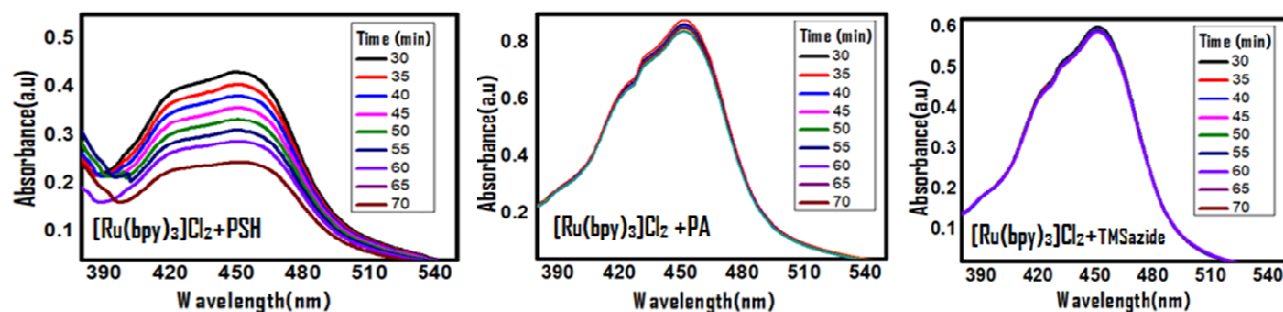

**Figure S3.** Kinetic plots for the photocatalytic degradation of  $[\text{Ru}(\text{bpy})_3]\text{Cl}_2$  with the reaction ingredients.

### 3.3. Cyclic Voltammetry Studies:

Electrochemical measurements were carried out with the glassy carbon as working, platinum wire as counter and  $\text{Ag}/\text{AgCl}(3\text{M NaCl})$  as reference electrode, in  $\text{CH}_3\text{CN}$  solvent using  $\text{NBu}_4\text{PF}_6$  as supporting electrolyte over a scan rate of 100 mV/s. The cyclic voltammogram's of individual reactants and their combinations were collected to observe changes in the peak pattern for corroboration with the absorption and luminescence data. Figure S3 Experimental data was analyzed by subtracting the electrolyte solution background current prior to identifying the peak current ( $C_p$ ) and determining the potential ( $E_{1/2}$ ) at half of its value ( $C_p/2$ ). The calculated potentials were referenced to  $\text{Ag}/\text{AgCl}$ .

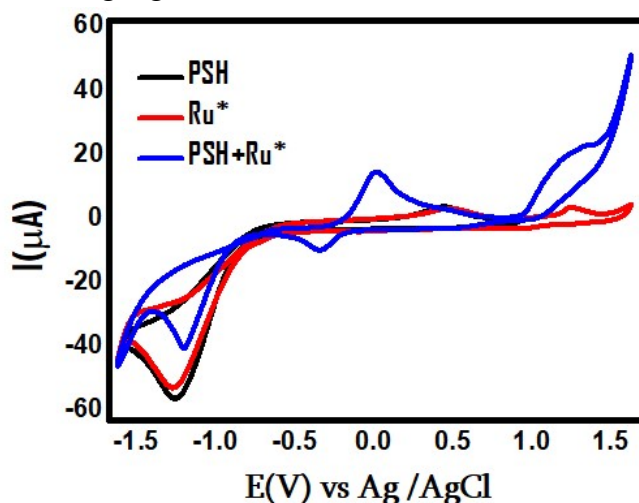

**Figure S4.** Cyclic voltammograms of photocatalyst with reactant combinations

As can be seen from CV plots, an oxidation and a reduction peak corresponding to  $\text{Ru}(\text{bpy})_3\text{Cl}_2$  catalyst were observed at 1.33 V and at -1.2 V respectively. Upon addition of  $2 \times 10^{-4}$  M of thiophenol (PSH), the CV plot of catalyst shows shifts in the oxidation peak (1.33 to 1.4 V) and reduction peak (-1.2 to -1.37), with emergence of two new peaks corresponding to oxidation potential of 0.08 V and reduction potential of 0.25V vs  $\text{Ag}/\text{AgCl}$ . The significant shift in potential coupled with decrease in the intensity of the reduction peak of  $\text{Ru}(\text{bpy})_3\text{Cl}_2$  upon

addition of thiophenol can be corroborated with the proposed reductive quenching/ single electron reduction of catalyst by thiophenol. Similarly, the newly emerged peaks can be ascribed to the oxidation of thiophenol by the photoexcited catalyst. Upon addition of equimolar concentration ( $2 \times 10^{-4}$  M) of Phenylacetylene (PA) to the binary system of catalyst + PSH, An observed shift (from 0.08 to 0.11 V) with decrease in current intensity of the oxidation peak ascribed to oxidized form of thiophenol (Thiyl radical) supports the second step of proposed reaction mechanism and also is in confirmation with absorbance and luminescence studies.

**Table S2 :** Mechanistic studies experimental data

| S.No | System                                              | Absorption             | Emission                                                    |             | Cyclic Voltammetry     |                        |
|------|-----------------------------------------------------|------------------------|-------------------------------------------------------------|-------------|------------------------|------------------------|
|      |                                                     | K (min <sup>-1</sup> ) | K <sub>sv</sub> (M <sup>-1</sup> )<br>... x 10 <sup>5</sup> | % quenching | E <sub>1/2</sub> V Red | E <sub>1/2</sub> V Oxd |
| 1    | [Ru(bpy) <sub>3</sub> Cl <sub>2</sub> ] +PSH        | .00845                 | 6.8                                                         | 80          | -1.024<br>0.18         | -0.064<br>1.216        |
| 2    | [Ru(bpy) <sub>3</sub> Cl <sub>2</sub> ] +PA         | .00087                 | 2.9                                                         | 60          | -1.107                 | 0.788                  |
| 3    | [Ru(bpy) <sub>3</sub> Cl <sub>2</sub> ] +TMS        | .00023                 | 1.3                                                         | 52          | - 0.963                | 0.822                  |
| 4    | [Ru(bpy) <sub>3</sub> Cl <sub>2</sub> ] +PSH<br>+PA | .00912                 | 12                                                          | 92          | - 1.047<br>- 0.198     | 0.11<br>1.3            |

### Figure S5. Control Experiments.

To gain the mechanistic insights some control experiments were performed. The reaction showed no product formation in the presence of TEMPO and benzoquinone, and in the absence of oxygen after degassing. In presence of TEMPO thiyl radical was trapped to afford **1h** product. Moreover, when intermediate **1d** was isolated and subjected to standard conditions it affords the product **1** in 20% yield therefore further solidifying the fact that reaction proceed through intermediate **1d**.

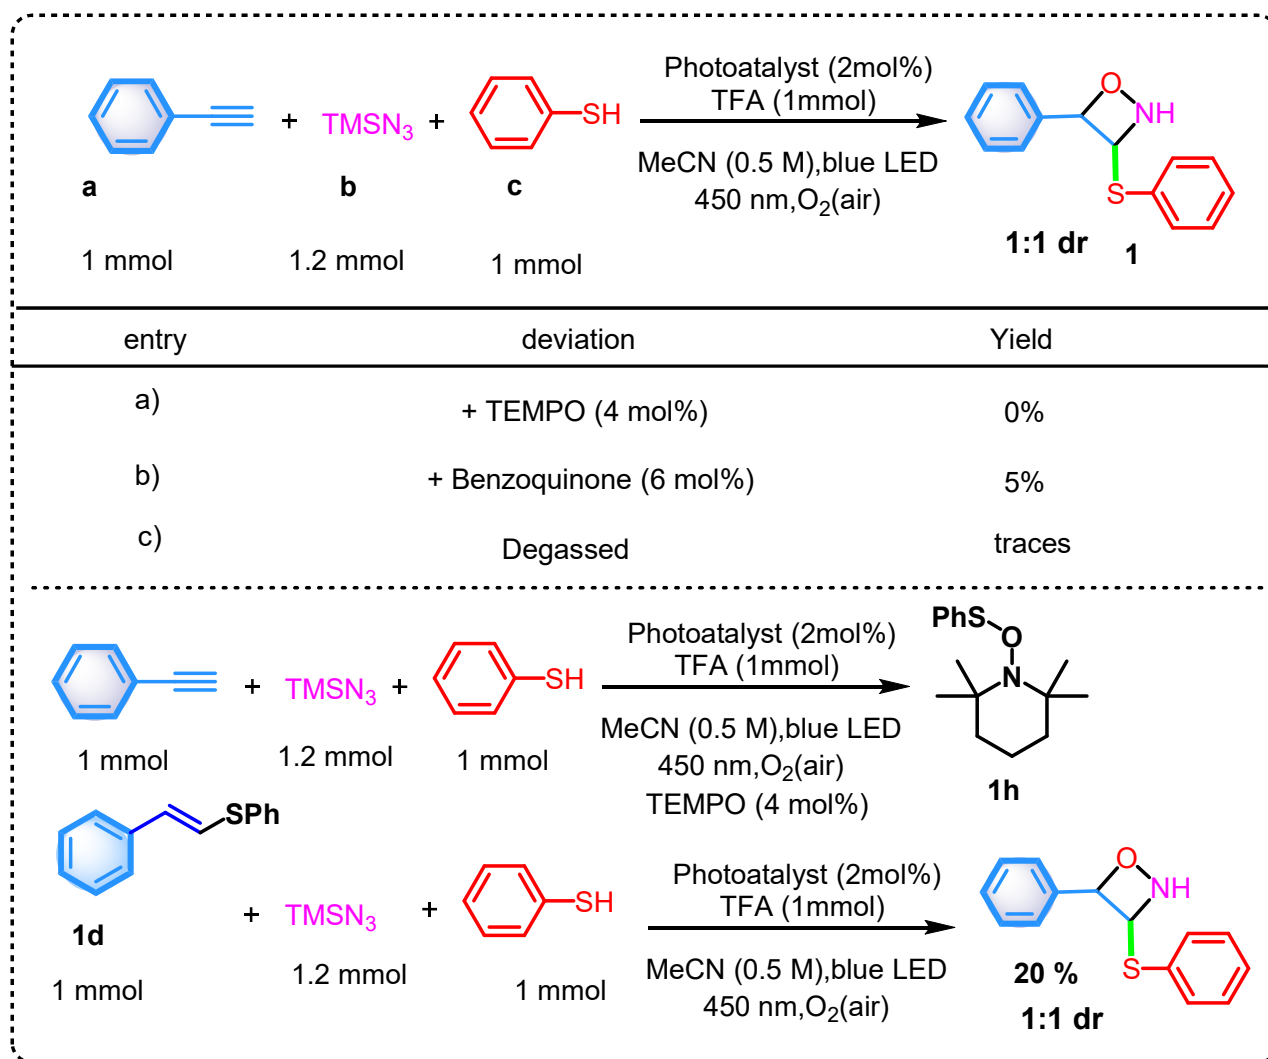

### 3.5. LCMS analysis of reaction mixture:

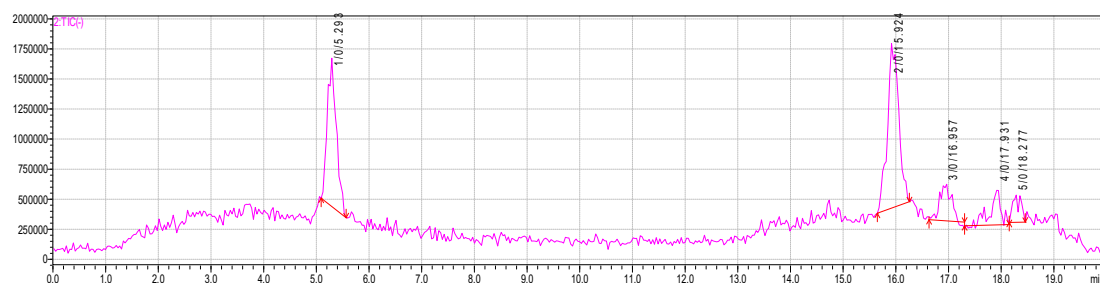

Ret. Time : [18.236->18.304]-[18.405->19.962] Scan# : [1079->1083]-[1089->1

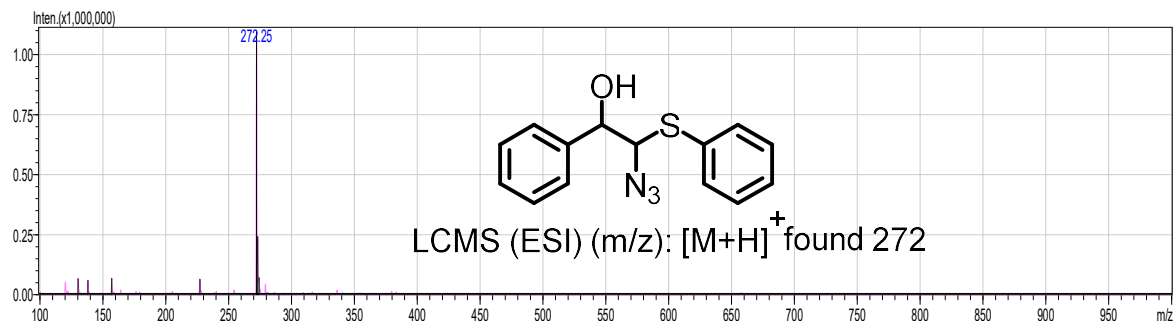

### 3.6. LCMS analysis of control experiment with TEMPO:

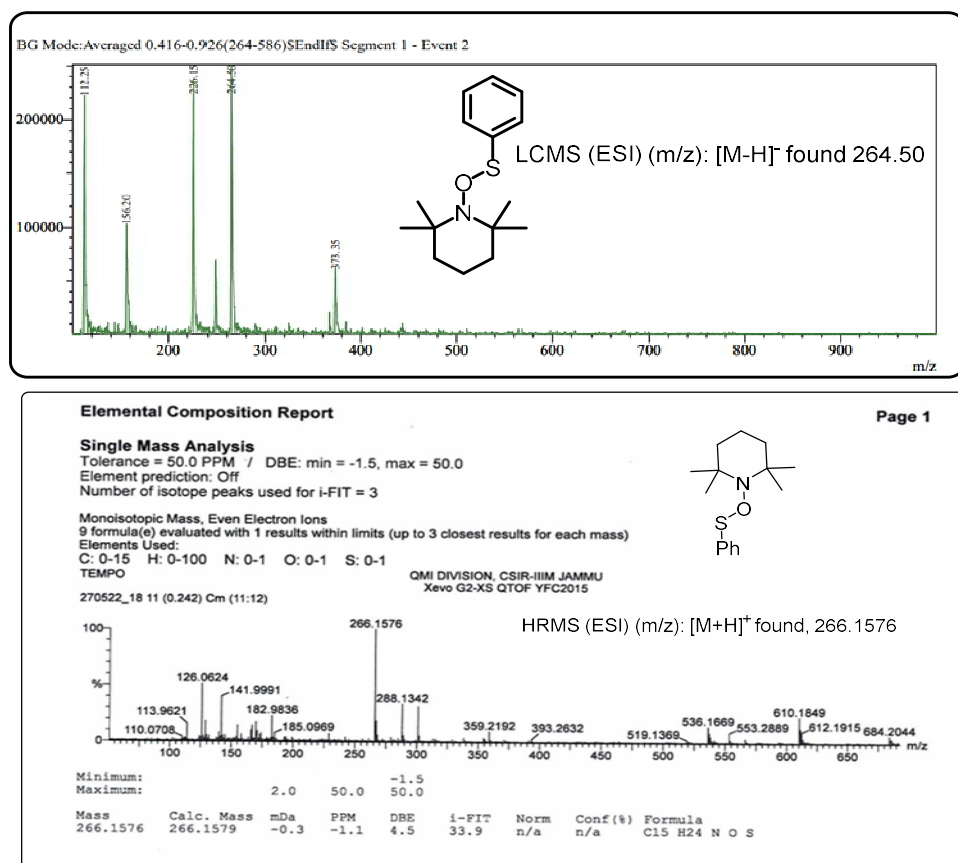

### 3.7 Alternative plausible mechanism (Scheme S1):

Based on LCMS analysis of the reaction mixture, we proposed an alternative mechanism Where the intermediate **1f** undergo peroxide cleavage to afford intermediate **1g** as detected by LCMS. The intermediate **1g** after nitrogen extrusion and protonation affords aminyl radical intermediate **1h** which can undergo insertion to give the product.

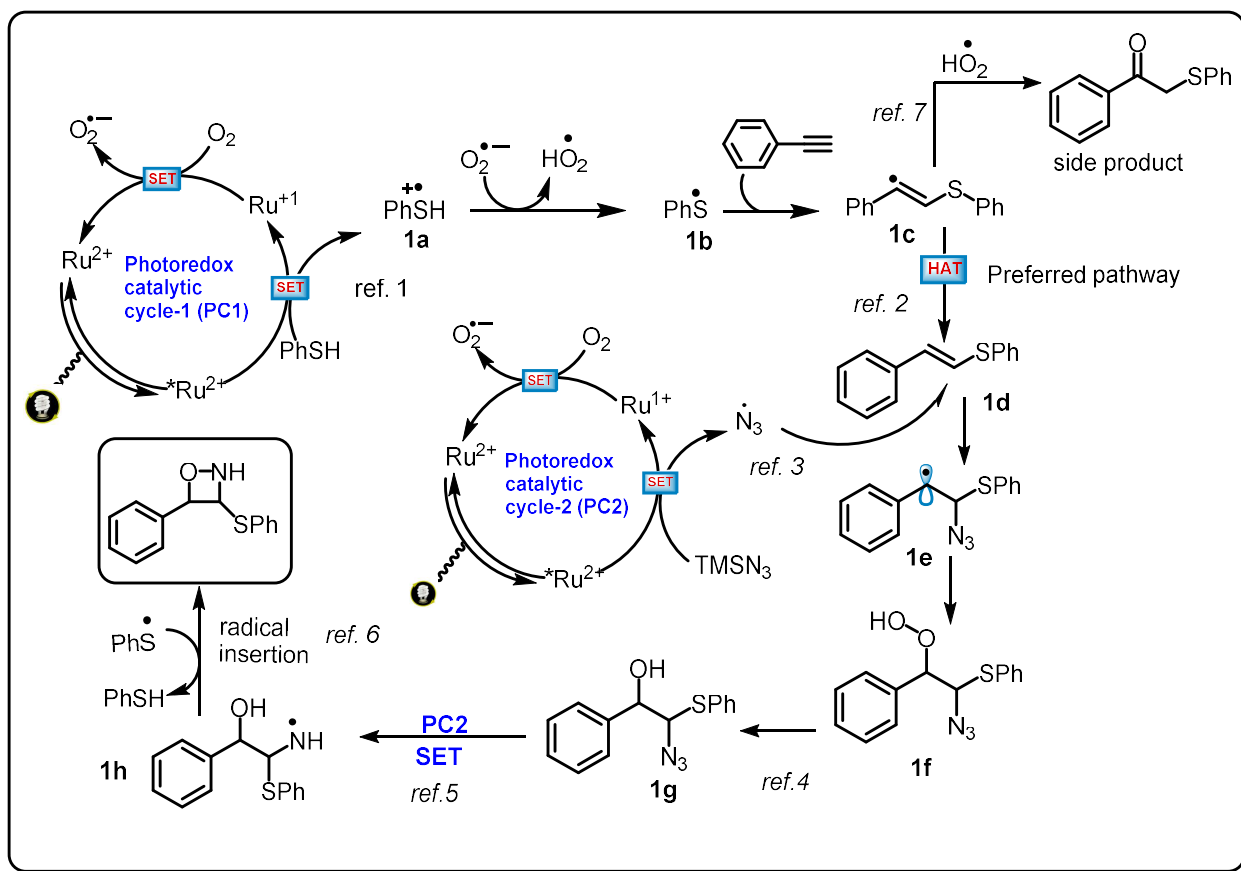

## References:

- (1) E. L. Tyson, M. S. Ament and T. P. Yoon, *J. Org. Chem.*, 2013, **78**, 2046.
- (2) (a) J. Kumar, A. Ahmad, M. A. Rizvi and B. A. Shah, *Org Lett.*, 2020, **22**, 5661., (b) J. M. Opp and V. A. Schmidt, *Org. Lett.* 2019, **21**, 8031., (c) F. Dénes, M. Pichowicz, G. Povie and P. Renaud, *Chem. Rev.* 2014, **114**, 2587., (d) U. Wille, *Chem. Rev.*, 2013, **113**, 813., (e) Q. Lu, J. Zhang, G. Zhao, Y. Qi, H. Wang and A. J. Lei, *Am. Chem. Soc.* 2013, **135**, 11481.
- (3) Y. Yang, C. H. Xu, Z. Q. Xiong and J. H. Li, *Chem. Commun.* 2020, **56**, 9549., (b) A. Bunescu, T. M. Ha, Q. Wang and J. Zhu, *Angew. Chem. Int. Ed.* 2017, **56**, 10555. (c) K. Shen and Q. J. Wang, *Am. Chem. Soc.* 2017, **139**, 13110., (d) X. Geng, F. Lin, X. Wang and N. Jiao, *Org. Lett.* 2017, **19**, 4738.
- (4) (a) F. Kouser, V. K. Sharma, M. Rizvi, S. Sultan, N. Chalotra, V. K. Gupta, U. Nandi and B. A. Shah, *Tetrahedron Lett.* 2018, **59**, 2161. (b) A. K. Singh, R. Chawla, T. Keshari, V. K. Yadav and L. D. S. Yadav, *Org. Biomol. Chem.* 2014, **12**, 8550.
- (5) Y. Chen, A. S. Kamlet, J. B. Steinman, and D. R. Liu, *Nat. Chem.* 2011, **3**, 146.
- (6) W. Liu, C. Chen, P. Zhou and H. Tan, *Org. Lett.* 2017, **19**, 5830.
- (7) (a) Q. Lu, J. Zhang, G. Zhao, Y. Qi, H. Wang and A. Lei, *J. Am. Chem. Soc.* 2013, **135**, 11481-11484. (b) A. Luridiana, A. Frongia, M. A. Scorciapino, G. Mallocci, B. Manconi, S. Serrao, P. C. Ricci, F. Secci, *Adv. Synth. Catal.* 2022, **364**, 124.

#### 4. Determination of reaction quantum yield.

The quantum yield of the reaction was calculated in two steps:

1. The conventional potassium ferrioxalate actinometer method published in literature<sup>1-6</sup> was used to determine the photon flux of the blue LED. The iron(III) actinometer complex potassium trisoxalatoferrate (III) trihydrate was synthesized according to literature reports<sup>3</sup>. An experiment was set up to evaluate the light intensity by dissolving 0.737 g of potassium trisoxalato ferrate trihydrate complex in 10 mL of a 0.05 M H<sub>2</sub>SO<sub>4</sub> solution to make a 0.15 M ferrioxalate actinometer solution. In a buffer solution made by dissolving 5.63 g sodium acetate in 25 mL of a 0.5 M solution H<sub>2</sub>SO<sub>4</sub>, a 0.2% by weight solution of 1, 10-phenanthroline ligand was prepared. Both solutions were kept in a dark place.

The actinometer measurement was done as follows:

After irradiation of 2.0mL actinometer solution for the 90s, 0.35 mL of the phenanthroline solution was added to the cuvette and the mixture was allowed to stir in the dark for 1.0 h to allow the complexation of the phenanthroline ligand with the produced ferrous to form a red-color [Fe(phen)<sub>3</sub>]<sup>2+</sup> complex whose absorbance was measured at 510 nm against reagent blank after dilution (1:1) A non-irradiated sample (containing actinometer solution, buffer, and phenanthroline ligand in the same proportions as indicated but not irradiated) was also prepared and its absorbance at λ 510 nm was measured using similar conditions. The moles of Fe<sup>2+</sup> formed can be determined according to the Beer's Laws using the equation:

$$\text{moles of Fe}^{2+} = \frac{V(L) \times \Delta A(510)}{1(\text{cm}) \times \epsilon(\text{L mol}^{-1}\text{cm}^{-1})} = 4.29 \times 10^{-7}$$

Where V is the total volume of the solution (0.00235 L) after the addition of all reagents, ΔA is the difference in absorbance at λ 510 nm between the irradiated and non-irradiated actinometer solutions (2.24 - 0.21). l is the path length (1.00 cm), and ε is the molar absorptivity of the ferrioxalate actinometer<sup>3</sup> at λ 510 nm (11,100 L mol<sup>-1</sup>cm<sup>-1</sup>). The photon flux of the Blue LED was calculated as under:

$$\text{Photon flux} = \frac{\text{moles of Fe}^{2+}}{\Phi \times t \times f} = 4.2 \times 10^{-9}$$

Where  $\Phi$  is the quantum yield for the ferrioxalate actinometer (1.12),  $t$  is the irradiation time (90 s), and  $f$  is the fraction of light absorbed by the ferrioxalate actinometer. An absorption spectrum gave an absorbance value of  $>3$ , indicating that the fraction of absorbed light ( $f$ ) is  $>0.999$ . The photon flux was thus calculated (average of three experiments) to be  $4.29 \times 10^{-9}$  Einsteins  $s^{-1}$ .

## 2. Determination of the reaction quantum yield.

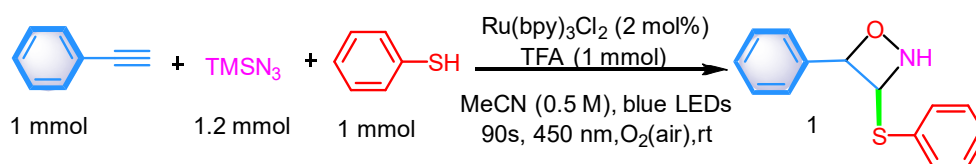

Phenylacetylene (20  $\mu$ L, 0.196 mmol, 1.0 equiv), Thiophenol (21  $\mu$ L, 0.196 mmol, 1.0 equiv), Trimethylsilyl azide (26  $\mu$ L, 0.23 mmol, 1.2 equiv), Trifluoroacetic acid (22.54  $\mu$ L, 0.196 mmol, 1.0 equiv) and [Ru(bpy)<sub>3</sub>]Cl<sub>2</sub> (3 mg, 0.003 mmol) were placed in a quartz cuvette. The sample was stirred and irradiated for 90s. After irradiation, the yield of product **1** formed was determined using the peak area analysis method of Gas Chromatography technique.<sup>7</sup> The yield of the product **1** formed after 90s of irradiation as determined from quantitative analysis by gas chromatography was found to be 0.55% corresponding to ( $1 \times 10^{-6}$  mol). The reaction quantum yield ( $\Phi$ ) was then arrived at using the equation:

$$\Phi = \frac{\text{moles of product formed}}{\text{photon flux} \times t \times f} = 2$$

Where the photon flux is  $4.2 \times 10^{-9}$  einsteins  $s^{-1}$  (as determined by actinometry in step 1),  $t$  is the reaction time (90s) and  $f$  is the fraction of incident light absorbed by the reaction mixture. An initial absorption spectrum of the aforementioned reaction mixture gave an absorbance value of  $>3$  at 420 nm indicating that essentially all the incident light is absorbed by the photocatalyst in the reaction mixture, therefore ( $f$ ) is  $>0.999$ .<sup>8</sup>

The reaction quantum yield ( $\Phi$ ) was thus determined to be 2 indicating a possible short radical chain process<sup>9</sup>.

A

B

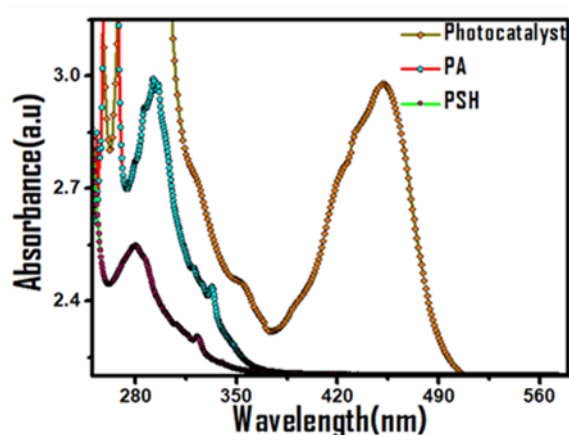

**Figure 1A:** Initial absorption spectra of reaction mixture showing absorption > 3 indicating that essentially all the incident light is absorbed by the photocatalyst and therefore  $(f \sim 0.999)^8$

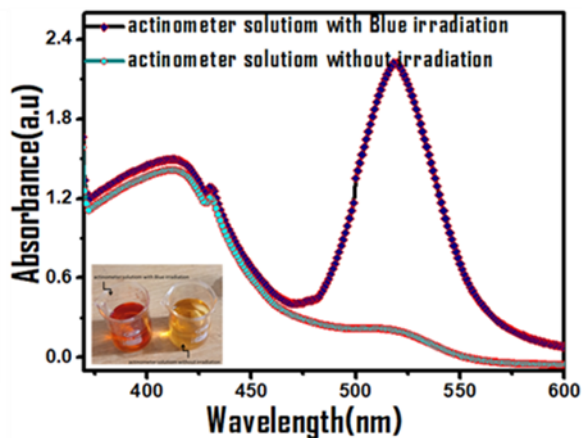

**Figure 2B :** Absorption spectra's of actinometer solution without and after irradiation for 90s

## References:

- (1) S. Sultan, M. A. Rizvi, J. Kumar and B. A. Shah, *Chem. Eur. J.*, 2018, **24**, 10617
- (2) C. G and C. A. Parker, *Proc. Roy. Soc. (London)* 1956, **A23**, 518-531.
- (3) M. Montalti, A. Cerdi, L. Prodi and M.T Gandolfi, *Chemical Actinometry. Handbook of Photochemistry*, III (Eds.: Taylor & Francis Group) ,LLC. Boca Raton, FL, 2006, **601**.
- (4) H. J. Kuhn, S. E. Braslavsky and R. Schmidt, *Pure Appl. Chem.*, 2004, **76**, 2105-2146.
- (5) I. P. Pozdnyakov, O. V. Kel, V. F. Plyusnin, V. P. Grivin and N. M. Bazhin, *J. Phys. Chem. A.*, 2008, **112**, 8316–8322.
- (6) W. D. Bowman and Demas, J. N. *Phys. Chem.*, 1976, **80**, 2434–2435.
- (7) G. Guiochon and C. L. Guillemin, *Journal of Chromatography Library.*, 1988, **42**, 629-659
- (8) M. Teders, L. Pitzer, S. Buss and F. Glorius, *ACS Catal.*, 2017, **7**, 4053-4056.
- (9) X. Guo, B. Shao, W. f. Jiang and L. Shi, *J. Org. Chem.*, 2021, **86**, 15743-15752.
- (10) M. A. Cismesia and T. P. Yoon, *Chem. Sci.*, 2015, **6**, 5426-5434.

#### 4. Spectral Data

##### 4-phenyl-3-(phenylthio)-1,2-oxazetidine (1)

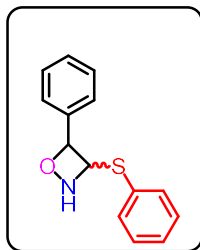

Following the general procedure the reaction was carried out with phenylacetylene (100  $\mu$ L, 0.98 mmol), trimethylsilyl azide (134  $\mu$ L, 1.17 mmol), thiophenol (107  $\mu$ L, 0.98 mmol), TFA (112  $\mu$ L, 0.98 mmol), Ru(bpy)<sub>3</sub>Cl<sub>2</sub> (14 mg, 2 mol%) and purified by column chromatography (hexane:EA = 98:2) as yellow oil (161 mg, 66% yield). <sup>1</sup>H NMR (400 MHz, CDCl<sub>3</sub>)  $\delta$  - 7.52 (dd,  $J$  = 6.4, 3.1 Hz, 2H), 7.49 – 7.45 (m, 3H), 7.45 – 7.41 (m, 7H), 7.40 (d,  $J$  = 2.0 Hz, 2H), 7.38 (d,  $J$  = 2.0 Hz, 2H), 7.37 (d,  $J$  = 1.0 Hz, 1H), 7.36 – 7.34 (m, 3H), 4.95 (d,  $J$  = 4.8 Hz, 1H), 4.79 (dd,  $J$  = 5.9, 3.3 Hz, 2H), 4.75 (d,  $J$  = 6.5 Hz, 1H), 2.88 (s, 1H), 2.75 (s, 1H). <sup>13</sup>C{<sup>1</sup>H} NMR (125 MHz, CDCl<sub>3</sub>)  $\delta$  - 139.2, 139.0, 134.0, 133.3, 132.1, 131.0, 129.4, 129.3, 128.8, 128.7, 128.6, 128.5, 128.5, 126.9, 126.8, 126.7, 77.1, 76.3, 76.1, 75.0. HRMS (ESI) ( $m/z$ ): [M + H]<sup>+</sup> calculated for C<sub>14</sub>H<sub>14</sub>NOS, 244.0791; found: 244.0774.

##### 3-(phenylthio)-4-(p-tolyl)-1,2-oxazetidine (2)

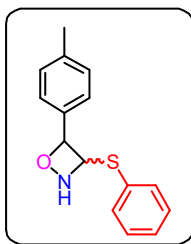

Following the general procedure the reaction was carried out with 4-methylphenylacetylene (100  $\mu$ L, 0.86 mmol), trimethylsilyl azide (118  $\mu$ L, 1.03 mmol), thiophenol (94  $\mu$ L, 0.86 mmol), TFA (98  $\mu$ L, 0.86 mmol), Ru(bpy)<sub>3</sub>Cl<sub>2</sub> (12 mg, 2 mol%) and purified by column chromatography (hexane:EA = 99:1) as yellow oil (185 mg, 72% yield). <sup>1</sup>H NMR (400 MHz, CDCl<sub>3</sub>)  $\delta$  - 7.55 – 7.52 (m, 1H), 7.48 (dd,  $J$  = 3.7, 2.0 Hz, 2H), 7.39 – 7.33 (m, 8H), 7.32 (s, 3H), 7.24 (d,  $J$  = 2.0 Hz, 2H), 7.22 (s, 2H), 4.91 (d,  $J$  = 5.1 Hz, 1H), 4.80 – 4.76 (m, 2H), 4.71 (d,  $J$  = 6.5 Hz, 1H), 2.86 (s, 1H), 2.72 (s, 1H), 2.40 (s, 6H). <sup>13</sup>C{<sup>1</sup>H} (125 MHz, CDCl<sub>3</sub>)  $\delta$  - 138.5, 138.5, 136.6, 136.0, 133.4, 133.2, 132.2, 131.1, 129.4, 129.3, 129.8, 129.2, 128.7, 128.46, 126.8, 126.7, 76.9, 76.1, 76.0, 74.8, 21.3. HRMS (ESI) ( $m/z$ ): [M+H]<sup>+</sup> calculated for C<sub>15</sub>H<sub>16</sub>NOS 258.0947; found: 258.0933.

##### 4-(4-ethylphenyl)-3-(phenylthio)-1,2-oxazetidine (3)

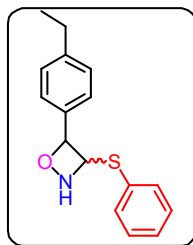

Following the general procedure the reaction was carried out with 4-ethylphenylacetylene (100  $\mu$ L, 0.76 mmol), trimethylsilyl azide (105.8  $\mu$ L, 0.92 mmol), thiophenol (83.6  $\mu$ L, 0.76 mmol), TFA (86.64  $\mu$ L, 0.76 mmol), Ru(bpy)<sub>3</sub>Cl<sub>2</sub> (11.36 mg, 2 mol%) and purified by column chromatography (hexane:EA = 99:1) as yellow oil (162 mg, 60% yield). <sup>1</sup>H NMR (400 MHz, CDCl<sub>3</sub>)  $\delta$  - 7.51 – 7.49 (m, 1H), 7.46 – 7.42 (m, 3H), 7.36 – 7.33 (m, 4H), 7.32 (d,  $J$  = 3.7 Hz, 7H), 7.22 (d,  $J$  = 7.8 Hz, 3H), 4.90 (d,  $J$  = 4.4 Hz, 1H), 4.76 (d,  $J$  = 5.9 Hz, 2H), 4.73 – 4.65 (m, 1H), 2.80 (s, 1H), 2.67 (t,  $J$  = 6.8 Hz, 4H), 1.59 (s, 1H), 1.25 (t,  $J$  = 7.5 Hz, 6H). <sup>13</sup>C{<sup>1</sup>H} (125 MHz, CDCl<sub>3</sub>)  $\delta$  - 144.8, 136.5, 136.3, 133.8, 133.2, 132.3, 129.3, 129.7, 129.0, 128.7, 128.4, 128.0, 127.0, 126.8, 126.7, 77.1, 76.2, 76.16, 75.0, 28.4, 15.4, 15.4. HRMS (ESI) ( $m/z$ ): [M+H]<sup>+</sup> calculated for C<sub>16</sub>H<sub>18</sub>NOS 272.1104; found: 272.1106.

### 3-(phenylthio)-4-(4-propylphenyl)-1,2-oxazetidine (4)

Following the general procedure the reaction was carried out with 4-n-propylphenylacetylene (100  $\mu$ L, 0.69 mmol), trimethylsilyl azide (95.45  $\mu$ L, 0.83 mmol), thiophenol (75.9  $\mu$ L, 0.69 mmol), TFA (78  $\mu$ L, 0.69 mmol), Ru(bpy)<sub>3</sub>Cl<sub>2</sub> (10 mg, 2 mol%) and purified by column chromatography (hexane:EA = 99:1) as yellow oil (176 mg, 62% yield). <sup>1</sup>H NMR (400 MHz, CDCl<sub>3</sub>)  $\delta$  - 7.50 – 7.48 (m, 1H), 7.44 (dd,  $J$  = 6.3, 3.0 Hz, 3H), 7.34 (dd,  $J$  = 8.5, 1.8 Hz, 6H), 7.31 (s, 5H), 7.21 (s, 2H), 7.19 (s, 1H), 4.89 (d,  $J$  = 4.2 Hz, 1H), 4.76 (d,  $J$  = 5.6 Hz, 2H), 4.73 – 4.68 (m, 1H), 2.65 (d,  $J$  = 3.7 Hz, 1H), 2.61 (t,  $J$  = 7.6 Hz, 4H), 1.68 – 1.63 (m, 4H), 1.59 (s, 1H), 0.97 – 0.93 (m, 6H). <sup>13</sup>C{<sup>1</sup>H} (125 MHz, CDCl<sub>3</sub>)  $\delta$  - 143.3, 143.3, 136.5, 136.2, 133.93, 133.3, 132.2, 131.2, 129.4, 129.3, 128.9, 128.7, 128.7, 128.6, 128.4, 126.8, 126.7, 77.1, 76.2, 76.1, 74.9, 37.8, 24.5, 24.5, 13.9. HRMS (ESI) ( $m/z$ ): [M+H]<sup>+</sup> calculated for C<sub>17</sub>H<sub>20</sub>NOS 286.1260; found: 286.1249.

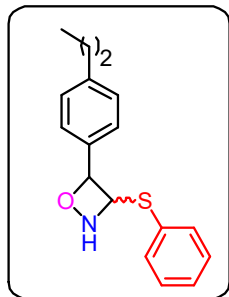

### 4-(4-pentylphenyl)-3-(phenylthio)-1,2-oxazetidine (5)

Following the general procedure the reaction was carried out with 4-n-pentylphenylacetylene (100  $\mu$ L, 0.58 mmol), trimethylsilyl azide (79  $\mu$ L, 0.69 mmol), thiophenol (63.8  $\mu$ L, 0.58 mmol), TFA (66  $\mu$ L, 0.58 mmol), Ru(bpy)<sub>3</sub>Cl<sub>2</sub> (8 mg, 2 mol%) and purified by column chromatography (hexane:EA = 99:1) as yellow oil (256 mg, 82% yield). <sup>1</sup>H NMR (400 MHz, CDCl<sub>3</sub>)  $\delta$  - 7.50 (dd,  $J$  = 6.6, 2.9 Hz, 2H), 7.45 (dd,  $J$  = 4.5, 2.1 Hz, 2H), 7.35 (d,  $J$  = 2.3 Hz, 2H), 7.34 – 7.31 (m, 8H), 7.22 – 7.19 (m, 4H), 4.91 – 4.89 (m, 1H), 4.76 (d,  $J$  = 6.0 Hz, 2H), 4.71 (dd,  $J$  = 6.4, 2.4 Hz, 1H), 2.86 (d,  $J$  = 2.9 Hz, 1H), 2.73 (d,  $J$  = 3.7 Hz, 1H), 2.62 (d,  $J$  = 7.5 Hz, 4H), 1.66 – 1.62 (m, 4H), 1.37 – 1.32 (m, 8H), 0.91 (dd,  $J$  = 6.9, 5.5 Hz, 6H). <sup>13</sup>C{<sup>1</sup>H} (125 MHz, CDCl<sub>3</sub>)  $\delta$  - 143.6, 143.5, 136.5, 136.2, 133.9, 133.2, 132.8, 131.2, 129.3, 129.3, 129.1, 128.7, 128.6, 128.6, 128.4, 126.8, 126.7, 77.1, 76.2, 76.1, 74.9, 35.7, 31.5, 31.1, 31.1, 22.6, 14.0. HRMS (ESI) ( $m/z$ ): [M+H]<sup>+</sup> calculated for C<sub>19</sub>H<sub>24</sub>NOS 314.1573; found: 314.1566.

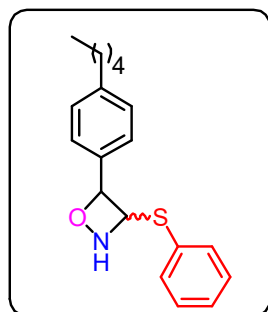

### 4-(4-(tert-butyl)phenyl)-3-(phenylthio)-1,2-oxazetidine (6)

Following the general procedure the reaction was carried out with 4-*tert*-butyl-phenylacetylene (100  $\mu$ L, 0.63 mmol), trimethylsilyl azide (86.2  $\mu$ L, 0.75 mmol), thiophenol (69.3  $\mu$ L, 0.63 mmol), TFA (71  $\mu$ L, 0.63 mmol), Ru(bpy)<sub>3</sub>Cl<sub>2</sub> (9 mg, 2 mol%) and purified by column chromatography (hexane:EA = 99:1) as yellow oil (185 mg, 62% yield). <sup>1</sup>H NMR (400 MHz, CDCl<sub>3</sub>)  $\delta$  - 7.50 (dd,  $J$  = 6.6, 2.9 Hz, 2H), 7.45 – 7.42 (m, 4H), 7.41 (s, 2H), 7.37 – 7.31 (m, 10H), 4.92 (s, 1H), 4.77 (dd,  $J$  = 5.7, 2.3 Hz, 2H), 4.73 (d,  $J$  = 6.1 Hz, 1H), 2.83 (s, 1H), 2.69 (s, 1H), 1.35 (d,  $J$  = 1.0 Hz, 18H). <sup>13</sup>C{<sup>1</sup>H} NMR (100 MHz, CDCl<sub>3</sub>)  $\delta$  - 151.7, 151.7, 136.3, 136.0, 133.8, 133.2, 132.4, 131.9, 129.3, 129.2, 128.6, 128.4, 126.6, 126.5, 125.4, 125.42, 77.1, 76.2, 76.2, 75.0, 34.6, 31.3. HRMS (ESI) ( $m/z$ ): [M+H]<sup>+</sup> calculated for C<sub>18</sub>H<sub>22</sub>NOS 300.1417; found: 300.1415.

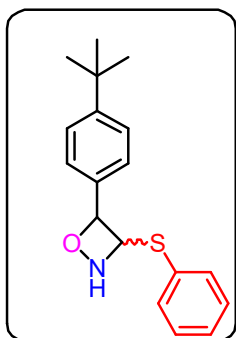

#### 4-mesityl-3-(phenylthio)-1,2-oxazetidine (7)

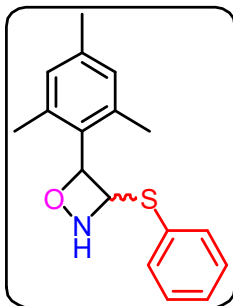

Following the general procedure the reaction was carried out with 2,4,6-trimethyl phenylacetylene (100  $\mu$ L, 0.69 mmol), trimethylsilyl azide (94.62  $\mu$ L, 0.83 mmol), thiophenol (75.9  $\mu$ L, 0.69 mmol), TFA (78  $\mu$ L, 0.69 mmol), Ru(bpy)<sub>3</sub>Cl<sub>2</sub> (10 mg, 2 mol%) and purified by column chromatography (hexane:EA = 99:1) as yellow oil (153 mg, 54% yield). <sup>1</sup>H NMR (400 MHz, CDCl<sub>3</sub>)  $\delta$  7.49 – 7.44 (m, 2H), 7.35 (dd,  $J$  = 6.5, 3.0 Hz, 2H), 7.30 – 7.28 (m, 2H), 7.24 (dd,  $J$  = 6.4, 3.9 Hz, 3H), 7.20 (d,  $J$  = 2.3 Hz, 2H), 7.17 (s, 1H), 6.86 (d,  $J$  = 5.5 Hz, 2H), 5.04 (d,  $J$  = 5.5 Hz, 1H), 4.79 (d,  $J$  = 7.4 Hz, 1H), 4.74 (d,  $J$  = 7.4 Hz, 1H), 4.70 (d,  $J$  = 5.5 Hz, 1H), 2.15 (dd,  $J$  = 8.8, 6.8 Hz, 18H). <sup>13</sup>C NMR (100 MHz, CDCl<sub>3</sub>)  $\delta$  - 134.0, 133.9, 133.3, 132.0, 131.9, 129.3, 129.3, 128.7, 128.4, 127.4, 76.9, 75.5, 72.7, 70.8, 19.4, 19.4, 18.7, 18.7. HRMS (ESI) (m/z): [M+H]<sup>+</sup> calculated for C<sub>17</sub>H<sub>20</sub>NOS 286.1260; found: 286.1258.

#### 4-(4-fluorophenyl)-3-(phenylthio)-1,2-oxazetidine (8)

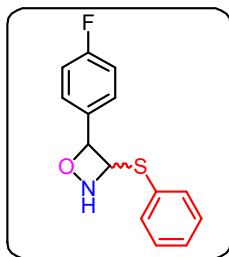

Following the general procedure the reaction was carried out with 4-fluorophenylacetylene (100  $\mu$ L, 0.83 mmol), trimethylsilyl azide (113  $\mu$ L, 0.99 mmol), thiophenol (91.3  $\mu$ L, 0.83 mmol), TFA (94  $\mu$ L, 0.83 mmol), Ru(bpy)<sub>3</sub>Cl<sub>2</sub> (12 mg, 2 mol%) and purified by column chromatography (hexane:EA = 99:1) as yellow oil (133 mg, 51% yield). <sup>1</sup>H NMR (400 MHz, CDCl<sub>3</sub>)  $\delta$  - 7.47 (s, 1H), 7.45 (d,  $J$  = 1.8 Hz, 2H), 7.43 (s, 1H), 7.39 (dd,  $J$  = 8.9, 3.9 Hz, 10H), 7.33 (s, 1H), 7.31 (s, 1H), 7.30 (s, 1H), 7.27 (d,  $J$  = 1.9 Hz, 1H), 4.92 (d,  $J$  = 4.5 Hz, 1H), 4.76 (d,  $J$  = 6.0 Hz, 1H), 4.71 (d,  $J$  = 5.4 Hz, 2H), 2.76 (s, 1H), 2.69 (s, 1H). <sup>13</sup>C{<sup>1</sup>H} (100 MHz, CDCl<sub>3</sub>)  $\delta$  - 163.3 (d,  $J$  = 248 Hz), 163.1 (d,  $J$  = 248 Hz), 139.2, 139.1, 136.7 (d,  $J$  = 8.4 Hz), 136.1 (d,  $J$  = 8.4 Hz), 133.8, 130.3, 129.4, 128.8, 128.7, 128.6, 128.5, 126.9, 116.5 (d,  $J$  = 21.8 Hz), 116.5 (d,  $J$  = 22 Hz), 77.4, 76.6, 76.3, 75.1. <sup>19</sup>F NMR (377 MHz, CDCl<sub>3</sub>)  $\delta$  - -117.9, -118; HRMS (ESI) (m/z): [M+H]<sup>+</sup> calculated for C<sub>14</sub>H<sub>13</sub>FNOS 262.0696; found: 262.0702.

#### 4-(2-fluorophenyl)-3-(phenylthio)-1,2-oxazetidine(9)

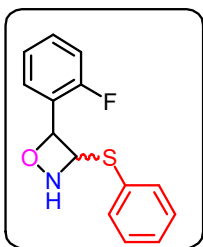

Following the general procedure the reaction was carried out with 2-fluorophenylacetylene (100  $\mu$ L, 0.83 mmol), trimethylsilyl azide (113  $\mu$ L, 0.99 mmol), thiophenol (91.3  $\mu$ L, 0.83 mmol), TFA (94  $\mu$ L, 0.83 mmol), Ru(bpy)<sub>3</sub>Cl<sub>2</sub> (12 mg, 2 mol%) and purified by column chromatography (hexane:EA = 99:1) as yellow oil (151 mg, 58% yield). <sup>1</sup>H NMR (400 MHz, CDCl<sub>3</sub>)  $\delta$  - 7.52 (dt,  $J$  = 7.4, 6.8 Hz, 2H), 7.46 – 7.43 (m, 2H), 7.39 (dd,  $J$  = 6.7, 2.9 Hz, 2H), 7.30 – 7.25 (m, 8H), 7.18 – 7.13 (m, 2H), 7.03 – 6.97 (m, 2H), 5.24 (t,  $J$  = 4.4 Hz, 1H), 5.12 – 5.08 (m, 1H), 4.82 (t,  $J$  = 5.3 Hz, 2H), 3.16 (d,  $J$  = 3.6 Hz, 1H), 3.09 (d,  $J$  = 4.3 Hz, 1H). <sup>13</sup>C{<sup>1</sup>H} (100 MHz, CDCl<sub>3</sub>)  $\delta$  - 160.0 (d,  $J$  = 245 Hz), 159.8 (d,  $J$  = 244 Hz), 133.7, 133.3, 132.1, 131.6, 130.0 (d,  $J$  = 8 Hz), 130.0 (d,  $J$  = 8.4 Hz), 129.4, 128.6, 128.6, 128.3 (d,  $J$  = 3.8 Hz), 126.8 (d,  $J$  = 12.9 Hz), 126.5 (d,  $J$  = 12.9 Hz), 124.5, 124.4, 115.4 (d,  $J$  = 6.6 Hz), 115.3 (d,  $J$  = 6.8 Hz), 76.1, 74.7, 70.9, 69.9. <sup>19</sup>F NMR (377 MHz, CDCl<sub>3</sub>)  $\delta$  - -106.3, -106.8; HRMS (ESI) (m/z): [M+H]<sup>+</sup> calculated for C<sub>14</sub>H<sub>13</sub>FNOS 262.0696; found: 262.0685.

#### 4-(4-chlorophenyl)-3-(phenylthio)-1,2-oxazetidine (10)

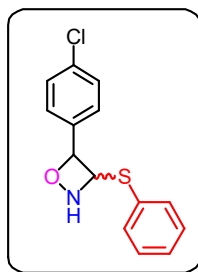

Following the general procedure the reaction was carried out with 4-chloro phenylacetylene (100  $\mu$ L, 0.73 mmol), trimethylsilyl azide (101.2  $\mu$ L, 0.73 mmol), thiophenol (80.3  $\mu$ L, 0.73 mmol), TFA (83.22  $\mu$ L, 0.73 mmol), Ru(bpy)<sub>3</sub>Cl<sub>2</sub> (10.92 mg, 2 mol%) and purified by column chromatography (hexane:EA = 99:1) as yellow oil (199 mg, 72% yield). <sup>1</sup>H NMR (400 MHz, CDCl<sub>3</sub>)  $\delta$  - 7.51 – 7.48 (m, 2H), 7.45 – 7.42 (m, 3H), 7.37 (t, *J* = 2.6 Hz, 2H), 7.35 (d, *J* = 1.5 Hz, 8H), 7.34 (s, 1H), 7.33 (s, 1H), 7.33 – 7.32 (m, 1H), 4.87 (d, *J* = 5.3 Hz, 1H), 4.72 (d, *J* = 5.6 Hz, 2H), 4.70 – 4.64 (m, 1H), 2.90 (s, 1H), 2.74 (s, 1H). <sup>13</sup>C{<sup>1</sup>H} (100 MHz, CDCl<sub>3</sub>)  $\delta$  - 139.1, 139.0, 135.4, 135.2, 134.8, 134.5, 130.7, 129.5, 129.5, 129.2, 129.2, 128.8, 128.7, 128.6, 128.6, 126.8, 77.1, 76.4, 76.0, 75.2. HRMS (ESI) (*m/z*): [M+H]<sup>+</sup> calculated for C<sub>14</sub>H<sub>13</sub>ClNOS 278.0401; found: 278.0391.

#### 4-(2-chlorophenyl)-3-(phenylthio)-1,2-oxazetidine(11)

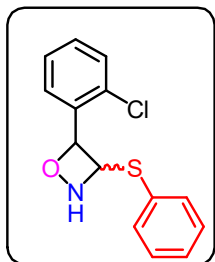

Following the general procedure the reaction was carried out with 2-chlorophenylacetylene (100  $\mu$ L, 0.73 mmol), trimethylsilyl azide (101.2  $\mu$ L, 0.73 mmol), thiophenol (80.3  $\mu$ L, 0.73 mmol), TFA (83.22  $\mu$ L, 0.73 mmol), Ru(bpy)<sub>3</sub>Cl<sub>2</sub> (10.92 mg, 2 mol%) and purified by column chromatography (hexane:EA = 99:1) as yellow oil (155 mg, 56% yield). <sup>1</sup>H NMR (400 MHz, CDCl<sub>3</sub>)  $\delta$  - 7.50 – 7.46 (m, 2H), 7.44 – 7.42 (m, 2H), 7.40 – 7.38 (m, 6H), 7.36 (dd, *J* = 2.7, 1.6 Hz, 2H), 7.34 (d, *J* = 2.1 Hz, 2H), 7.33 – 7.30 (m, 4H), 4.91 (d, *J* = 5.4 Hz, 1H), 4.78 – 4.68 (m, 3H), 2.86 (s, 2H). <sup>13</sup>C{<sup>1</sup>H} (100 MHz, CDCl<sub>3</sub>)  $\delta$  - 137.1, 136.7, 133.3, 133.3, 132.3, 132.1, 131.8, 129.7, 129.6, 129.5, 129.4, 129.3, 128.9, 128.6, 128.4, 128.2, 127.1, 127.1, 75.9, 73.8, 73.4, 72.7. (ESI) (*m/z*): [M+H]<sup>+</sup> calculated for C<sub>14</sub>H<sub>13</sub>ClNOS 278.0401; found: 278.0390.

#### 4-(4-bromophenyl)-3-(phenylthio)-1,2-oxazetidine (12)

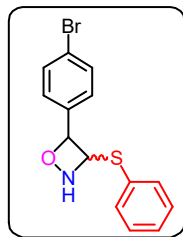

Following the general procedure the reaction was carried out with 4-bromophenylacetylene (100  $\mu$ L, 0.55 mmol), trimethylsilyl azide (77.05  $\mu$ L, 0.67 mmol), thiophenol (60.5  $\mu$ L, 0.55 mmol), TFA (62.7  $\mu$ L, 0.55 mmol), Ru(bpy)<sub>3</sub>Cl<sub>2</sub> (8.2 mg, 2 mol%) and purified by column chromatography (hexane:EA = 99:1) as yellow oil (181 mg, 58% yield). <sup>1</sup>H NMR (400 MHz, CDCl<sub>3</sub>)  $\delta$  - 7.47 (s, 1H), 7.45 (d, *J* = 1.8 Hz, 2H), 7.43 (d, *J* = 3.1 Hz, 2H), 7.40 (t, *J* = 4.7 Hz, 9H), 7.33 (s, 1H), 7.31 (s, 1H), 7.30 (s, 1H), 7.27 (d, *J* = 1.9 Hz, 1H), 4.92 (d, *J* = 4.5 Hz, 1H), 4.76 (d, *J* = 6.0 Hz, 1H), 4.71 (d, *J* = 5.4 Hz, 2H), 2.76 (s, 1H), 2.69 (s, 1H). <sup>13</sup>C{<sup>1</sup>H} NMR (100 MHz, CDCl<sub>3</sub>)  $\delta$  - 139.0, 138.9, 135.5, 135.3, 135.2, 132.4, 131.9, 131.6, 131.4, 131.3, 130.5, 128.9, 128.6, 128.6, 126.8, 126.7, 122.9, 76.9, 76.5, 75.7. (ESI) (*m/z*): [M+H]<sup>+</sup> calculated for C<sub>14</sub>H<sub>13</sub>BrNOS 321.9896; found: 321.9875.

#### 3-(phenylthio)-4-(4-(trifluoromethyl)phenyl)-1,2-oxazetidine (13)

Following the general procedure the reaction was carried out with 4-trifluoro-phenylacetylene (100  $\mu$ L, 0.58 mmol), trimethylsilyl azide (80.04  $\mu$ L, 0.696 mmol), thiophenol (63.8  $\mu$ L, 0.58 mmol), TFA (66.12  $\mu$ L, 0.58 mmol), Ru(bpy)<sub>3</sub>Cl<sub>2</sub> (8.6 mg, 2 mol%) and purified by column chromatography (hexane:EA = 99:1) as yellow oil. (193 mg, 62% yield). <sup>1</sup>H NMR (400 MHz,

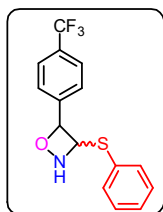

CDCl<sub>3</sub>)  $\delta$  - 7.64 – 7.60 (m, 4H), 7.51 (d,  $J$  = 7.3 Hz, 4H), 7.46 (dd,  $J$  = 7.4, 2.1 Hz, 2H), 7.42 (dd,  $J$  = 4.2, 3.3 Hz, 2H), 7.37 – 7.34 (m, 2H), 7.33 (s, 1H), 7.32 (dd,  $J$  = 5.1, 1.8 Hz, 3H), 4.94 (d,  $J$  = 5.3 Hz, 1H), 4.75 – 4.71 (m, 3H), 3.05 (s, 2H). <sup>13</sup>C{<sup>1</sup>H} (100 MHz, CDCl<sub>3</sub>)  $\delta$  - 143.1, 142.9, 134.2, 133.4, 131.7, 130.9, 130.8, 130.6, 130.5, 130.5, 129.5, 129.1, 128.8, 127.3, 127.3, 125.4 (dq,  $J$  = 7.5, 3.7 Hz), 77.0, 76.0, 75.7, 74.3. <sup>19</sup>F NMR (377 MHz, CDCl<sub>3</sub>)  $\delta$  - 62.5, -62.6. (ESI) (m/z): [M+H]<sup>+</sup> calculated for C<sub>15</sub>H<sub>13</sub>F<sub>3</sub>NOS 312.0664; found: 312.0665.

#### 4-(3-methoxyphenyl)-3-(phenylthio)-1,2-oxazetidine(14)

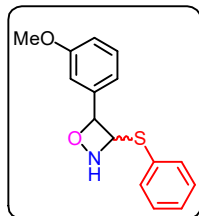

Following the general procedure the reaction was carried out with 3-methoxyphenylacetylene (100  $\mu$ L, 0.75 mmol), trimethylsilyl azide (104.53  $\mu$ L, 0.90 mmol), thiophenol (82.5  $\mu$ L, 0.75 mmol), TFA (85.5, 0.75 mmol), Ru(bpy)<sub>3</sub>Cl<sub>2</sub> (11.22 mg, 2 mol%) and purified by column chromatography (hexane:EA = 99:1) as yellow oil (131 mg, 48% yield). <sup>1</sup>H NMR (400 MHz, CDCl<sub>3</sub>)  $\delta$  - 7.42 (d,  $J$  = 2.5 Hz, 1H), 7.40 (d,  $J$  = 1.9 Hz, 5H), 7.38 – 7.37 (m, 2H), 7.37 – 7.35 (m, 2H), 7.24 (dd,  $J$  = 6.0, 2.0 Hz, 1H), 7.22 – 7.20 (m, 1H), 7.05 (ddd,  $J$  = 7.7, 1.6, 0.9 Hz, 1H), 7.02 (ddd,  $J$  = 7.7, 1.6, 0.9 Hz, 1H), 6.99 – 6.98 (m, 1H), 6.96 – 6.94 (m, 1H), 6.88 – 6.83 (m, 2H), 4.93 – 4.89 (m, 1H), 4.76 (dd,  $J$  = 5.5, 3.9 Hz, 3H), 3.77 (d,  $J$  = 1.0 Hz, 6H), 2.87 (s, 1H), 2.77 (s, 1H). <sup>13</sup>C{<sup>1</sup>H} (100 MHz, CDCl<sub>3</sub>)  $\delta$  - 160.0, 139.2, 138.9, 133.3, 132.3, 130.1, 130.1, 128.7, 128.7, 128.5, 128.5, 126.9, 126.8, 125.8, 125.2, 118.7, 118.1, 114.7, 114.4, 77.1, 76.3, 76.0, 75.1, 55.4. (ESI) (m/z): [M+H]<sup>+</sup> calculated for C<sub>15</sub>H<sub>16</sub>NO<sub>2</sub>S 274.0896; found: 274.0889.

#### 4-(4-methoxyphenyl)-3-(phenylthio)-1,2-oxazetidine(15)

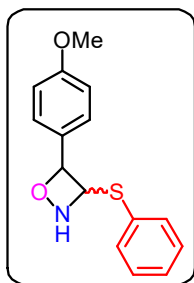

Following the general procedure the reaction was carried out with 4-methoxyphenylacetylene (100  $\mu$ L, 0.75 mmol), trimethylsilyl azide (104.53  $\mu$ L, 0.90 mmol), thiophenol (82.5  $\mu$ L, 0.75 mmol), TFA (85.5, 0.75 mmol), Ru(bpy)<sub>3</sub>Cl<sub>2</sub> (11.22 mg, 2 mol%) and purified by column chromatography (hexane:EA = 99:1) as yellow oil (131 mg, 48% yield). <sup>1</sup>H NMR (400 MHz, CDCl<sub>3</sub>)  $\delta$  - 7.52 – 7.47 (m, 2H), 7.45 – 7.42 (m, 2H), 7.36 – 7.33 (m, 4H), 7.33 – 7.29 (m, 6H), 6.91 (d,  $J$  = 6.8 Hz, 4H), 4.85 (d,  $J$  = 5.4 Hz, 1H), 4.73 (d,  $J$  = 6.7 Hz, 2H), 4.66 (d,  $J$  = 6.5 Hz, 1H), 3.82 (d,  $J$  = 2.0 Hz, 6H), 2.79 (s, 1H), 2.65 (s, 1H). <sup>13</sup>C{<sup>1</sup>H} (100 MHz, CDCl<sub>3</sub>)  $\delta$  - 159.8, 159.8, 133.9, 133.3, 132.1, 131.3, 131.1, 131.0, 129.4, 129.3, 128.8, 128.5, 128.1, 128.1, 113.9, 113.9, 77.1, 76.2, 75.8, 74.6, 55.3, 55.2. (ESI) (m/z): [M+H]<sup>+</sup> calculated for C<sub>15</sub>H<sub>16</sub>NO<sub>2</sub>S 274.0896; found: 274.0888.

#### 3-(phenylthio)-4-propyl-1,2-oxazetidine(16)

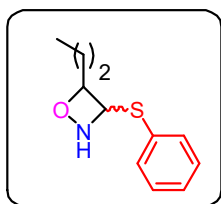

Following the general procedure the reaction was carried out with 1-Pentyne (100  $\mu$ L, 1.47 mmol), trimethylsilyl azide (335  $\mu$ L, 2.94 mmol), thiophenol (161  $\mu$ L, 1.47 mmol), TFA (169  $\mu$ L, 1.47 mmol), Ru(bpy)<sub>3</sub>Cl<sub>2</sub> (10.92 mg, 2 mol%) and purified by column chromatography (hexane:EA = 99:1) as yellow oil (146 mg, 70% yield). <sup>1</sup>H NMR (400 MHz, CDCl<sub>3</sub>)  $\delta$  - 7.59 – 7.52 (m, 2H), 7.44 (ddd,  $J$  = 7.9, 5.5, 3.7 Hz, 3H), 7.36 – 7.34 (m, 2H), 7.28 (d,  $J$  = 1.6 Hz, 3H), 4.56 (t,  $J$  = 5.2 Hz, 1H), 4.46 (d,  $J$  = 3.9 Hz, 1H), 3.89 – 3.66 (m, 2H), 2.67 (d,  $J$  =

4.4 Hz, 1H), 2.26 (d,  $J = 39.2$  Hz, 1H), 1.84 – 1.59 (m, 4H), 1.54 – 1.30 (m, 4H), 0.93 (ddd,  $J = 20.0, 10.9, 4.0$  Hz, 6H).  $^{13}\text{C}\{^1\text{H}\}$  (100 MHz,  $\text{CDCl}_3$ )  $\delta$  - 133.6, 133.4, 132.8, 132.6, 129.2, 129.1, 128.1, 127.9, 75.5, 73.7, 73.0, 72.4, 66.9, 35.7, 35.4, 19.2, 18.8, 14.0. (ESI) (m/z):  $[\text{M}+\text{H}]^+$  calculated for  $\text{C}_{11}\text{H}_{16}\text{NOS}$  210.0947; found: 210.0953.

#### 4-butyl-3-(phenylthio)-1,2-oxazetidine(17)

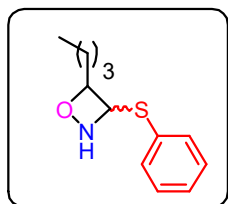

Following the general procedure the reaction was carried out with 1-Hexyne (100  $\mu\text{L}$ , 1.21 mmol), trimethylsilyl azide (273  $\mu\text{L}$ , 2.94 mmol), thiophenol (133  $\mu\text{L}$ , 1.21 mmol), TFA (139  $\mu\text{L}$ , 1.21 mmol),  $\text{Ru}(\text{bpy})_3\text{Cl}_2$  (14 mg, 2 mol%) and purified by column chromatography (hexane:EA = 99:1) as yellow oil (174 mg, 78% yield).  $^1\text{H}$  NMR (400 MHz,  $\text{CDCl}_3$ )  $\delta$  7.57 – 7.53 (m, 4H), 7.37 – 7.34 (m, 5H), 7.31 – 7.28 (m, 1H), 4.57 (t,  $J = 4.8$  Hz, 2H), 3.82 – 3.76 (m, 1H), 3.71 (dd,  $J = 7.8, 4.4$  Hz, 1H), 2.28 (s, 1H), 2.17 (s, 1H), 1.74 – 1.69 (m, 2H), 1.61 – 1.56 (m, 2H), 1.51 – 1.45 (m, 2H), 1.37 – 1.31 (m, 6H), 0.93 – 0.90 (m, 6H).  $^{13}\text{C}\{^1\text{H}\}$  (100 MHz,  $\text{CDCl}_3$ )  $\delta$  - 133.7, 133.4, 129.4, 129.4, 129.0, 128.6, 128.5, 127.5, 76.6, 75.5, 73.9, 73.2, 33.4, 33.0, 27.7, 27.6, 22.6, 22.6, 14.0. (ESI) (m/z):  $[\text{M}+\text{H}]^+$  calculated for  $\text{C}_{12}\text{H}_{18}\text{NOS}$  224.1104; found: 224.110.

#### 4-pentyl-3-(phenylthio)-1,2-oxazetidine (18)

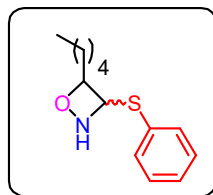

Following the general procedure the reaction was carried out with 1-Heptyne (100  $\mu\text{L}$ , 1.04 mmol), trimethylsilyl azide (239  $\mu\text{L}$ , 2.08 mmol), thiophenol (114  $\mu\text{L}$ , 1.04 mmol), TFA (118  $\mu\text{L}$ , 1.04 mmol),  $\text{Ru}(\text{bpy})_3\text{Cl}_2$  (15 mg, 2 mol%) and purified by column chromatography (hexane:EA = 99:1) as yellow oil (161 mg, 68% yield).  $^1\text{H}$  NMR (400 MHz,  $\text{CDCl}_3$ )  $\delta$  7.56 – 7.54 (m, 3H), 7.44 (dd,  $J = 5.3, 4.3$  Hz, 2H), 7.34 (dd,  $J = 3.3, 1.9$  Hz, 3H), 7.30 – 7.27 (m, 2H), 4.57 (t,  $J = 5.3$  Hz, 2H), 3.81 – 3.77 (m, 1H), 3.72 (dd,  $J = 8.4, 4.2$  Hz, 1H), 2.36 (d,  $J = 4.3$  Hz, 1H), 2.27 (d,  $J = 4.9$  Hz, 1H), 1.74 – 1.64 (m, 3H), 1.53 (ddd,  $J = 11.4, 11.0, 7.0$  Hz, 3H), 1.30 (dd,  $J = 5.5, 1.6$  Hz, 10H), 0.91 – 0.87 (m, 6H).  $^{13}\text{C}\{^1\text{H}\}$  (100 MHz,  $\text{CDCl}_3$ )  $\delta$  - 133.7, 133.4, 132.8, 132.6, 129.4, 129.2, 129.1, 128.6, 76.6, 75.5, 73.9, 73.2, 33.7, 33.3, 31.7, 31.7, 25.2, 25.2, 22.5, 14.0. (ESI) (m/z):  $[\text{M}+\text{H}]^+$  calculated for  $\text{C}_{13}\text{H}_{20}\text{NOS}$  238.1260; found: 238.1266.

#### 4-hexyl-3-(phenylthio)-1,2-oxazetidine(19)

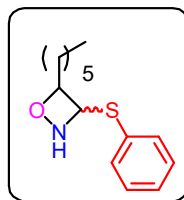

Following the general procedure the reaction was carried out with octyne (100  $\mu\text{L}$ , 0.90 mmol), trimethylsilyl azide (125.35  $\mu\text{L}$ , 1.09 mmol), thiophenol (100  $\mu\text{L}$ , 0.90 mmol), TFA (85.5, 0.75 mmol),  $\text{Ru}(\text{bpy})_3\text{Cl}_2$  (13 mg, 2 mol%) and purified by column chromatography (hexane:EA = 99:1) as yellow oil (80 mg, 32% yield).  $^1\text{H}$  NMR (400 MHz,  $\text{CDCl}_3$ )  $\delta$  - 7.49 (dd,  $J = 5.9, 3.3$  Hz, 4H), 7.30 – 7.28 (m, 5H), 7.23 (d,  $J = 6.7$  Hz, 1H), 4.50 (t,  $J = 4.5$  Hz, 2H), 3.74 – 3.70 (m, 1H), 3.64 (d,  $J = 3.8$  Hz, 1H), 2.18 (s, 1H), 2.08 (s, 1H), 1.69 – 1.60 (m, 3H), 1.50 (ddd,  $J = 17.6, 9.0, 4.2$  Hz, 5H), 1.39 (dd,  $J = 12.2, 6.7$  Hz, 3H), 1.34 – 1.21 (m, 9H), 0.85 (t,  $J = 6.9$  Hz, 6H).  $^{13}\text{C}\{^1\text{H}\}$  NMR (125 MHz,  $\text{CDCl}_3$ )  $\delta$  - 136.6, 133.7, 133.4, 133.2, 131.7, 129.7, 129.4, 129.4, 128.6, 128.5, 125.7, 125.0, 76.6, 75.5, 73.9, 73.2, 33.7, 33.2, 31.7, 25.1, 22.5, 14.0. (ESI) (m/z):  $[\text{M}+\text{H}]^+$  calculated for  $\text{C}_{14}\text{H}_{22}\text{NOS}$  252.1417; found: 252.1423.

#### 4-heptyl-3-(phenylthio)-1,2-oxazetidine (20)

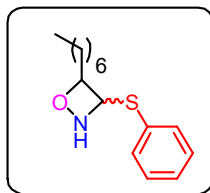

Following the general procedure the reaction was carried out with 1-nonyne (100  $\mu$ L, 0.806 mmol), trimethylsilyl azide (185  $\mu$ L, 1.61 mmol), thiophenol (88  $\mu$ L, 0.806 mmol), TFA (91  $\mu$ L, 0.806 mmol), Ru(bpy)<sub>3</sub>Cl<sub>2</sub> (12 mg, 2 mol%) and purified by column chromatography (hexane:EA = 99:1) as yellow oil (212 mg, 80% yield). <sup>1</sup>H NMR (400 MHz, CDCl<sub>3</sub>)  $\delta$  7.55 (dd,  $J$  = 5.3, 2.3 Hz, 3H), 7.46 – 7.42 (m, 2H), 7.36 – 7.34 (m, 3H), 7.29 (d,  $J$  = 1.8 Hz, 2H), 4.57 (t,  $J$  = 4.9 Hz, 2H), 3.80 – 3.77 (m, 1H), 3.71 (d,  $J$  = 4.4 Hz, 1H), 2.28 (s, 1H), 2.18 (s, 1H), 1.85 – 1.62 (m, 5H), 1.60 – 1.42 (m, 5H), 1.30 – 1.25 (m, 14H), 0.90 – 0.87 (m, 6H). <sup>13</sup>C{<sup>1</sup>H} (100 MHz, CDCl<sub>3</sub>)  $\delta$  - 133.7, 133.4, 132.8, 132.6, 129.4, 129.2, 129.1, 128.6, 75.5, 73.9, 73.3, 72.6, 33.7, 33.6, 33.3, 31.8, 29.5, 29.4, 29.2, 25.9, 25.5, 25.5, 22.7, 14.1. (ESI) (m/z): [M+H]<sup>+</sup> calculated for C<sub>15</sub>H<sub>24</sub>NOS 266.1573; found: 266.1579

#### 4-cyclopropyl-3-(phenylthio)-1,2-oxazetidine (21)

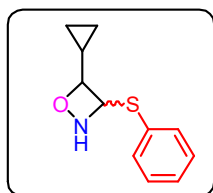

Following the general procedure the reaction was carried out with 1-nonyne (100  $\mu$ L, 0.806 mmol), trimethylsilyl azide (185  $\mu$ L, 1.61 mmol), thiophenol (88  $\mu$ L, 0.806 mmol), TFA (91  $\mu$ L, 0.806 mmol), Ru(bpy)<sub>3</sub>Cl<sub>2</sub> (12 mg, 2 mol%) and purified by column chromatography (hexane:EA = 99:1) as yellow oil (212 mg, 80% yield). <sup>1</sup>H NMR (400 MHz, CDCl<sub>3</sub>)  $\delta$  7.38 – 7.34 (m, 3H), 7.16 (s, 1H), 7.16 – 7.12 (m, 4H), 7.07 (dd,  $J$  = 11.0, 4.8 Hz, 2H), 4.47 (dd,  $J$  = 17.7, 4.1 Hz, 2H), 3.01 (ddd,  $J$  = 13.0, 8.3, 4.1 Hz, 2H), 2.18 (s, 1H), 1.09 – 0.90 (m, 2H), 0.49 – 0.35 (m, 4H), 0.32 – 0.07 (m, 4H). <sup>13</sup>C{<sup>1</sup>H} (100 MHz, CDCl<sub>3</sub>)  $\delta$  133.1, 132.7, 132.5, 132.3, 129.4, 129.2, 129.1, 128.3, 78.6, 78.6, 76.4, 75.2, 14.6, 14.3, 3.2, 3.0. (ESI) (m/z): [M+H]<sup>+</sup> calculated for C<sub>11</sub>H<sub>14</sub>NOS 208.0791; found 208.0797

#### 4-phenyl-3-(p-tolylthio)-1,2-oxazetidine (22)

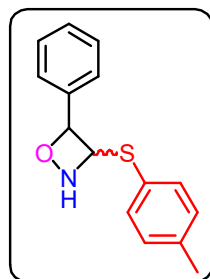

Following the general procedure the reaction was carried out with phenylacetylene (100  $\mu$ L, 0.98 mmol), trimethylsilyl azide (134  $\mu$ L, 1.17 mmol), 4-methyl-thiophenol (121  $\mu$ L, 0.98 mmol), TFA (111  $\mu$ L, 0.98 mmol), Ru(bpy)<sub>3</sub>Cl<sub>2</sub> (14 mg, 2 mol%) and purified by column chromatography (hexane:EA = 99:1) as yellow oil (154 mg, 60% yield). <sup>1</sup>H NMR (400 MHz, CDCl<sub>3</sub>)  $\delta$  - 7.39 (d,  $J$  = 6.0 Hz, 7H), 7.36 (s, 3H), 7.33 (d,  $J$  = 8.0 Hz, 4H), 7.17 – 7.12 (m, 4H), 4.88 (s, 1H), 4.74 – 4.68 (m, 2H), 4.64 (d,  $J$  = 6.6 Hz, 1H), 2.84 (s, 1H), 2.65 (s, 1H), 2.35 (d,  $J$  = 5.9 Hz, 6H). <sup>13</sup>C{<sup>1</sup>H} (125 MHz, CDCl<sub>3</sub>)  $\delta$  - 139.3, 139.2, 134.5, 133.9, 130.2, 130.2, 130.1, 129.8, 128.6, 128.5, 128.5, 128.5, 128.2, 126.9, 126.8, 77.4, 76.5, 76.1, 74.7, 21.2, 21.2. HRMS (ESI) (m/z): [M+H]<sup>+</sup> calculated for C<sub>15</sub>H<sub>16</sub>NOS 258.0947; found: 258.0933.

#### 3-((4-ethylphenyl)thio)-4-phenyl-1,2-oxazetidine (23)

Following the general procedure the reaction was carried out with phenylacetylene (100  $\mu$ L, 0.98 mmol), trimethylsilyl azide (134  $\mu$ L, 1.17 mmol), 4-ethyl-thiophenol (135  $\mu$ L, 0.98 mmol), TFA (111.7  $\mu$ L, 0.98 mmol), Ru(bpy)<sub>3</sub>Cl<sub>2</sub> (14 mg, 2 mol%) and purified by column chromatography

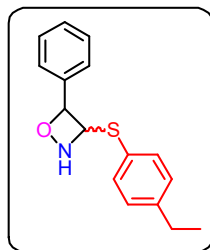

(hexane:EA = 99:1) as yellow oil (149 mg, 55% yield).  $^1\text{H}$  NMR (400 MHz,  $\text{CDCl}_3$ )  $\delta$  - 7.51 – 7.48 (m, 1H), 7.46 – 7.43 (m, 2H), 7.36 – 7.29 (m, 11H), 7.22 (d,  $J$  = 7.8 Hz, 4H), 4.90 (d,  $J$  = 4.4 Hz, 1H), 4.76 (d,  $J$  = 5.9 Hz, 2H), 4.68 (dd,  $J$  = 16.8, 6.4 Hz, 1H), 2.77 (d,  $J$  = 23.1 Hz, 1H), 2.67 (d,  $J$  = 7.5 Hz, 4H), 1.59 (s, 1H), 1.24 (d,  $J$  = 7.6 Hz, 6H).  $^{13}\text{C}\{^1\text{H}\}$  (100 MHz,  $\text{CDCl}_3$ )  $\delta$  - 144.8, 136.5, 136.3, 133.8, 133.2, 132.3, 129.3, 129.3, 128.6, 128.4, 128.0, 128.0, 126.8, 126.8, 76.7, 76.2, 76.2, 75.0, 28.4, 15.2. HRMS (ESI) ( $m/z$ ):  $[\text{M}+\text{H}]^+$  calculated for  $\text{C}_{16}\text{H}_{18}\text{NOS}$  272.1104; found: 272.1106.

### 3-((4-(tert-butyl)phenyl)thio)-4-phenyl-1,2-oxazetidine (24)

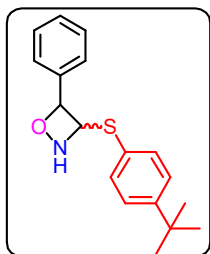

Following the general procedure the reaction was carried out with phenylacetylene (100  $\mu\text{L}$ , 0.98 mmol), trimethylsilyl azide (135  $\mu\text{L}$ , 1.176 mmol), 4-*tert*-butyl-thiophenol (162.68  $\mu\text{L}$ , 0.98 mmol), TFA (111.72  $\mu\text{L}$ , 0.98 mmol),  $\text{Ru}(\text{bpy})_3\text{Cl}_2$  (14 mg, 2 mol%) and purified by column chromatography (hexane:EA = 99:1) as yellow oil (193 mg, 65% yield).  $^1\text{H}$  NMR (400 MHz,  $\text{CDCl}_3$ )  $\delta$  - 7.47 – 7.45 (m, 2H), 7.44 (d,  $J$  = 3.8 Hz, 5H), 7.41 (d,  $J$  = 2.5 Hz, 3H), 7.39 (d,  $J$  = 4.9 Hz, 5H), 7.37 (d,  $J$  = 8.7 Hz, 3H), 4.93 (d,  $J$  = 5.0 Hz, 1H), 4.77 – 4.73 (m, 2H), 4.71 (d,  $J$  = 6.7 Hz, 1H), 2.95 (s, 1H), 2.78 (s, 1H), 1.35 (d,  $J$  = 3.4 Hz, 18H).  $^{13}\text{C}\{^1\text{H}\}$  (100 MHz,  $\text{CDCl}_3$ )  $\delta$  - 151.7, 151.7, 136.3, 136.0, 133.8, 133.2, 132.4, 131.5, 129.3, 129.2, 128.6, 128.4, 126.6, 126.5, 125.4, 125.4, 77.1, 76.2, 76.7, 75.0, 34.6, 31.3. HRMS (ESI) ( $m/z$ ):  $[\text{M}+\text{H}]^+$  calculated for  $\text{C}_{18}\text{H}_{22}\text{NOS}$  300.1417; found: 300.1415.

### 3-((4-methoxyphenyl)thio)-4-phenyl-1,2-oxazetidine (25)

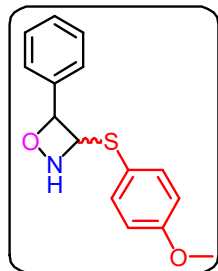

Following the general procedure the reaction was carried out with phenylacetylene (100  $\mu\text{L}$ , 0.98 mmol), trimethylsilyl azide (135  $\mu\text{L}$ , 1.176 mmol), 4-methoxy-thiophenol (137  $\mu\text{L}$ , 0.98 mmol), TFA (111.72  $\mu\text{L}$ , 0.98 mmol),  $\text{Ru}(\text{bpy})_3\text{Cl}_2$  (14 mg, 2 mol%) and purified by column chromatography (hexane:EA = 99:1) as yellow oil (114 mg, 42% yield).  $^1\text{H}$  NMR (400 MHz,  $\text{CDCl}_3$ )  $\delta$  - 7.46 (s, 1H), 7.43 (d,  $J$  = 3.3 Hz, 1H), 7.40 (d,  $J$  = 5.2 Hz, 7H), 7.37 (s, 4H), 6.87 (dd,  $J$  = 12.1, 8.7 Hz, 5H), 4.85 (d,  $J$  = 5.3 Hz, 1H), 4.66 (dd,  $J$  = 9.8, 6.4 Hz, 2H), 4.59 (d,  $J$  = 6.9 Hz, 1H), 3.82 (d,  $J$  = 5.4 Hz, 6H), 2.91 (s, 1H), 2.71 (s, 1H).  $^{13}\text{C}\{^1\text{H}\}$  (100 MHz,  $\text{CDCl}_3$ )  $\delta$  - 159.9, 159.8, 133.9, 133.3, 132.1, 131.2, 131.0, 129.4, 129.3, 128.7, 128.4, 128.1, 128.1, 113.9, 113.9, 77.1, 76.3, 75.8, 74.6, 55.3. (ESI) ( $m/z$ ):  $[\text{M}+\text{H}]^+$  calculated for  $\text{C}_{15}\text{H}_{16}\text{NO}_2\text{S}$  274.0896; found: 274.0888.

### 3-((2-bromophenyl)thio)-4-phenyl-1,2-oxazetidine (26)

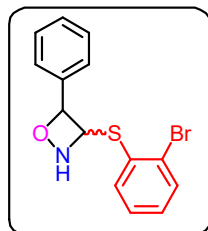

Following the general procedure the reaction was carried out with phenylacetylene (100  $\mu\text{L}$ , 0.98 mmol), trimethylsilyl azide (135  $\mu\text{L}$ , 1.176 mmol), 2-br-thiophenol (137  $\mu\text{L}$ , 0.98 mmol), TFA (111.72  $\mu\text{L}$ , 0.98 mmol),  $\text{Ru}(\text{bpy})_3\text{Cl}_2$  (14 mg, 2 mol%) and purified by column chromatography (hexane:EA = 99:1) as yellow oil (114 mg, 42% yield).  $^1\text{H}$  NMR (400 MHz,  $\text{CDCl}_3$ )  $\delta$  - 7.63 (d,  $J$  = 7.9 Hz, 2H), 7.56 (dd,  $J$  = 9.5, 3.5 Hz, 2H), 7.46 (d,  $J$  = 7.8 Hz, 3H), 7.42 (d,  $J$  = 4.3 Hz, 2H), 7.40 (s, 2H), 7.38 – 7.36 (m, 2H), 7.31 –

7.26 (m, 3H), 7.18 (ddd,  $J = 12.0, 5.9, 4.5$  Hz, 2H), 5.09 (d,  $J = 3.7$  Hz, 1H), 4.92 (d,  $J = 5.8$  Hz, 1H), 4.83 (dd,  $J = 4.9, 3.1$  Hz, 2H), 2.89 (s, 1H), 2.77 (s, 1H).  $^{13}\text{C}\{^1\text{H}\}$  (100 MHz,  $\text{CDCl}_3$ )  $\delta$  - 138.2, 138.0, 134.1, 133.4, 131.8, 131.7, 131.6, 130.7, 129.5, 129.4, 129.0, 128.7, 128.7, 128.6, 122.7, 122.6, 77.0, 76.1, 75.6, 74.4. (ESI) (m/z):  $[\text{M}+\text{H}]^+$  calculated for  $\text{C}_{14}\text{H}_{13}\text{BrNOS}$  321.9896; found: 321.9875.

### 3-((4-fluorophenyl)thio)-4-phenyl-1,2-oxazetidine (27)

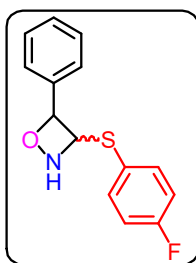

Following the general procedure the reaction was carried out with phenylacetylene (100  $\mu\text{L}$ , 0.98 mmol), trimethylsilyl azide (135  $\mu\text{L}$ , 1.176 mmol), 4-F-thiophenol (125.44  $\mu\text{L}$ , 0.98 mmol), TFA (111.72  $\mu\text{L}$ , 0.98 mmol),  $\text{Ru}(\text{bpy})_3\text{Cl}_2$  (14 mg, 2 mol%) and purified by column chromatography (hexane:EA = 99:1) as yellow oil (114 mg, 42% yield).  $^1\text{H}$  NMR (400 MHz,  $\text{CDCl}_3$ )  $\delta$  7.47 (s, 1H), 7.45 (d,  $J = 1.8$  Hz, 2H), 7.43 (d,  $J = 3.1$  Hz, 2H), 7.39 (dd,  $J = 8.9, 3.9$  Hz, 9H), 7.33 (s, 1H), 7.31 (s, 1H), 7.30 (s, 1H), 7.27 (d,  $J = 1.9$  Hz, 1H), 4.92 (d,  $J = 4.5$  Hz, 1H), 4.76 (d,  $J = 6.0$  Hz, 1H), 4.71 (d,  $J = 5.4$  Hz, 2H), 2.76 (s, 1H), 2.69 (s, 1H).  $^{13}\text{C}\{^1\text{H}\}$  (100 MHz,  $\text{CDCl}_3$ )  $\delta$  163.3 (d,  $J = 248$  Hz), 163.1 (d,  $J = 248$  Hz), 139.2, 139.1, 136.7 (d,  $J = 8.4$  Hz), 136.1 (d,  $J = 8.4$  Hz), 133.8, 130.3, 129.4, 128.8, 128.7, 128.6, 128.5, 128.3, 126.9, 116.5 (dd,  $J = 21.9, 3.4$  Hz), 77.4, 76.6, 76.3, 75.1.  $^{19}\text{F}$  NMR (377 MHz,  $\text{CDCl}_3$ )  $\delta$  - 111.6, 112.0. HRMS (ESI) (m/z):  $[\text{M}+\text{H}]^+$  calculated for  $\text{C}_{14}\text{H}_{13}\text{FNOS}$  262.0696; found: 262.0688.

### 3-((2-fluorophenyl)thio)-4-phenyl-1,2-oxazetidine (28)

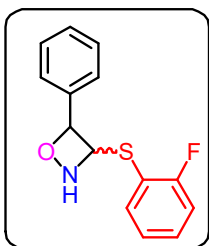

Following the general procedure the reaction was carried out with phenylacetylene (100  $\mu\text{L}$ , 0.98 mmol), trimethylsilyl azide (135  $\mu\text{L}$ , 1.176 mmol), 2-F-thiophenol (162.68  $\mu\text{L}$ , 0.98 mmol), TFA (111.72  $\mu\text{L}$ , 0.98 mmol),  $\text{Ru}(\text{bpy})_3\text{Cl}_2$  (14 mg, 2 mol%) and purified by column chromatography (hexane:EA = 99:1) as yellow oil (115 mg, 42% yield).  $^1\text{H}$  NMR (400 MHz,  $\text{CDCl}_3$ )  $\delta$  7.64 – 7.56 (m, 2H), 7.53 – 7.50 (m, 2H), 7.48 – 7.44 (m, 2H), 7.37 – 7.33 (m, 8H), 7.24 (ddd,  $J = 7.5, 3.8, 2.7$  Hz, 2H), 7.10 – 7.05 (m, 2H), 5.31 (d,  $J = 4.8$  Hz, 1H), 5.16 (d,  $J = 5.7$  Hz, 1H), 4.90 (t,  $J = 5.1$  Hz, 2H), 2.98 (s, 2H).  $^{13}\text{C}\{^1\text{H}\}$  (100 MHz,  $\text{CDCl}_3$ )  $\delta$  - 160.0 (d,  $J = 244$  Hz),  $\delta$  159.8 (d,  $J = 244$  Hz), 133.6, 133.2, 132.2, 131.6, 130.1 (d,  $J = 8$  Hz), 130.1 (d,  $J = 9$  Hz), 129.4, 129.4, 128.6, 128.6, 128.3, 128.3, 126.8 (d,  $J = 12.7$  Hz), 126.5 (d,  $J = 12.8$  Hz), 124.5, 124.4, 115.4 (d,  $J = 21$  Hz), 115.3 (d,  $J = 21.5$  Hz), 76.1, 74.8, 70.9, 69.9.  $^{19}\text{F}$  NMR (377 MHz,  $\text{CDCl}_3$ )  $\delta$  -106.3, -106.9. HRMS (ESI) (m/z):  $[\text{M}+\text{H}]^+$  calculated  $\text{C}_{14}\text{H}_{13}\text{FNOS}$  262.0696; found: 262.0690.

### 3-((2-chlorophenyl)thio)-4-phenyl-1,2-oxazetidine (29)

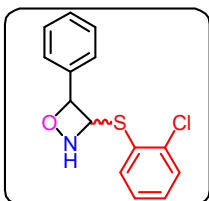

Following the general procedure the reaction was carried out with 2-chlorophenylacetylene (100  $\mu\text{L}$ , 0.73 mmol), trimethylsilyl azide (101.2  $\mu\text{L}$ , 0.73 mmol), 2-Cl-thiophenol (80.3  $\mu\text{L}$ , 0.73 mmol), TFA (83.22  $\mu\text{L}$ , 0.73 mmol),  $\text{Ru}(\text{bpy})_3\text{Cl}_2$  (10.92 mg, 2 mol%) and purified by column chromatography (hexane:EA = 99:1) as yellow oil (155 mg, 56% yield).  $^1\text{H}$  NMR (400 MHz,  $\text{CDCl}_3$ )  $\delta$  7.48 (d,  $J = 7.4$  Hz, 2H), 7.45 – 7.41 (m, 3H), 7.39 (dd,  $J = 3.6, 1.7$

Hz, 6H), 7.36 (s, 1H), 7.34 (d,  $J = 2.1$  Hz, 2H), 7.33 – 7.30 (m, 4H), 4.91 (d,  $J = 5.4$  Hz, 1H), 4.75 (dd,  $J = 6.0, 2.5$  Hz, 2H), 4.70 (d,  $J = 6.5$  Hz, 1H), 2.86 (s, 2H).  $^{13}\text{C}\{^1\text{H}\}$  (100 MHz,  $\text{CDCl}_3$ )  $\delta$  - 139.2, 139.0, 134.0, 133.3, 132.1, 131.03, 129.3, 129.3, 128.8, 128.8, 128.7, 128.7, 128.6, 128.5, 126.9, 126.8, 126.7, 77.1, 76.3, 76.1, 75.0. (ESI) (m/z):  $[\text{M}+\text{H}]^+$  calculated for  $\text{C}_{14}\text{H}_{13}\text{ClNOS}$  278.0401; found: 278.0398.

## 2-methyl-4-phenyl-3-(phenylthio)-1,2-oxazetidine (30)

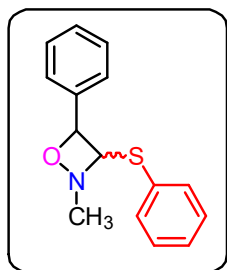

To an oven dried 50 ml glass vial, containing starting compound 4-phenyl-3-(phenylthio)-1,2-oxazetidine (50  $\mu\text{L}$ , 0.2 mmol) in DMF was added methyl iodide (86  $\mu\text{L}$ , 0.6 mmol) and pyridine (32  $\mu\text{L}$ , 0.4 mmol) with continuous stirring under air at room temperature for 4 hours. After the completion of reaction, as monitored by TLC, the reaction mixture was extracted with ethyl acetate and water. The aqueous layers were then washed with sodium bicarbonate ( $\text{NaHCO}_3$ ) and again extracted with ethyl acetate. The combined organic layers were dried over  $\text{Na}_2\text{SO}_4$  and concentrated under vacuum. The crude mixture was purified by silica gel column chromatography using (hexane/ethyl acetate 99:1) as a as colourless oil (107 mg, 42% yield).  $^1\text{H}$  NMR (400 MHz,  $\text{CDCl}_3$ )  $\delta$  - 7.49 (dd,  $J = 6.6, 2.9$  Hz, 2H), 7.46 – 7.42 (m, 3H), 7.41 (s, 5H), 7.39 (d,  $J = 2.1$  Hz, 2H), 7.38 – 7.36 (m, 2H), 7.35 (d,  $J = 2.2$  Hz, 2H), 7.32 (dd,  $J = 6.1, 2.9$  Hz, 4H), 4.93 (d,  $J = 5.4$  Hz, 1H), 4.76 (dd,  $J = 6.0, 2.4$  Hz, 2H), 4.73 (d,  $J = 6.5$  Hz, 1H), 2.95 (s, 3H), 2.88 (s, 3H).  $^{13}\text{C}\{^1\text{H}\}$  (125 MHz,  $\text{CDCl}_3$ )  $\delta$  - 139.3, 139.0, 134.0, 133.3, 132.1, 131.1, 129.4, 129.3, 128.8, 128.8, 128.7, 128.7, 128.5, 128.5, 126.9, 126.8, 77.1, 76.3, 76.1, 75.0, 36.6, 31.5. (ESI) (m/z):  $[\text{M}+\text{H}]^+$  calculated for  $\text{C}_{15}\text{H}_{16}\text{NOS}$  258.0947; found: 258.0940.

## 1-(4-phenyl-3-(phenylthio)-1,2-oxazetidin-2-yl)ethan-1-one (31)

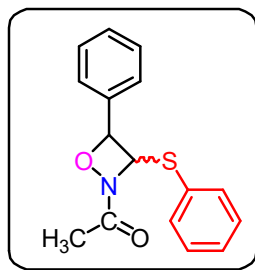

To an oven dried 50 ml glass vial, containing starting compound 4-phenyl-3-(phenylthio)-1,2-oxazetidine (50  $\mu\text{L}$ , 0.2 mmol) in THF was added acetic anhydride (62  $\mu\text{L}$ , 0.6 mmol) and triethylamine (60  $\mu\text{L}$ , 0.6 mmol), with continuous stirring under air at 40  $^\circ\text{C}$  for 36 hours. After the completion of reaction, as monitored by TLC, the reaction mixture was extracted with ethyl acetate and water. The aqueous layers were then washed with sodium bicarbonate ( $\text{NaHCO}_3$ ) and again extracted with ethyl acetate. The combined organic layers were dried over  $\text{Na}_2\text{SO}_4$  and concentrated under vacuum. The crude mixture was purified by silica gel column chromatography using (hexane/ethyl acetate 96:4) as a colourless oil (114 mg, 40% yield).  $^1\text{H}$  NMR (400 MHz,  $\text{CDCl}_3$ )  $\delta$  - 7.43 (d,  $J = 10.6$  Hz, 5H), 7.38 (s, 8H), 7.32 (s, 6H), 7.26 (s, 1H), 6.03 (dd,  $J = 6.2, 5.2$  Hz, 2H), 4.82 (dd,  $J = 5.2, 6.2$  Hz, 2H), 2.17 (d,  $J = 5.2$  Hz, 6H).  $^{13}\text{C}\{^1\text{H}\}$  (125 MHz,  $\text{CDCl}_3$ )  $\delta$  - 169.5, 169.4, 164.0, 163.9, 162.0, 161.9, 142.3, 133.4, 133.2, 132.2, 132.1, 131.8, 131.7, 131.6, 131.6, 129.4, 129.3, 129.2, 129.1, 129.0, 128.7, 128.7, 115.7, 115.6, 115.5, 115.43, 76.0, 75.6, 74.0, 73.4, 21.0, 20.8. (ESI) (m/z):  $[\text{M}+\text{H}]^+$  calculated for  $\text{C}_{16}\text{H}_{16}\text{NO}_2\text{S}$  286.0896; found: 286.0883.

## 2-((4-methoxyphenyl)sulfonyl)-4-phenyl-3-(phenylthio)-1,2-oxazetidine(32)

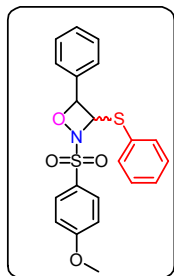

To an oven dried 50 ml glass vial, containing starting compound 4-phenyl-3-(phenylthio)-1,2-oxazetidine (50  $\mu$ L, 0.2 mmol) in DMF at  $-78^{\circ}\text{C}$  under inert conditions was added 4-methoxybenzenesulfonyl chloride (82  $\mu$ L, 0.4 mmol) and pyridine base (47  $\mu$ L, 0.6 mmol) with continuous stirring for 3 hours. After the completion of reaction, as monitored by TLC, the reaction mixture was extracted with ethyl acetate and water. The aqueous layers were then washed with sodium bicarbonate ( $\text{NaHCO}_3$ ) and again extracted with ethyl acetate. The combined organic layers were dried over  $\text{Na}_2\text{SO}_4$  and concentrated under vacuum. The crude mixture was purified by silica gel column chromatography using (hexane/ethyl acetate 80:20) as a colourless oil (144mg, 33% yield).  $^1\text{H}$  NMR (400 MHz,  $\text{CDCl}_3$ )  $\delta$  - 7.53 – 7.46 (m, 5H), 7.37 – 7.32 (m, 9H), 7.31 (d,  $J$  = 2.2 Hz, 1H), 7.30 – 7.24 (m, 4H), 6.98 (t,  $J$  = 11.1 Hz, 6H), 6.87 (dd,  $J$  = 25.0, 8.2 Hz, 3H), 4.90 (t,  $J$  = 5.0 Hz, 2H), 4.77 (dd,  $J$  = 5.7, 3.5 Hz, 2H), 4.72 (d,  $J$  = 6.3 Hz, 1H), 3.83 (s, 6H).  $^{13}\text{C}$  NMR (101 MHz,  $\text{CDCl}_3$ )  $\delta$  159.9, 139.3, 139.1, 133.6, 133.4, 130.3, 130.1, 128.84, 128.7, 128.7, 128.6, 128.5, 128.5, 128.5, 126.9, 126.8, 126.2, 125.8, 125.1, 119.2, 118.7, 118.1, 115.4, 114.7, 114.4, 79.2, 76.3, 75.0, 75.2, 55.4. (ESI) (m/z):  $[\text{M}+\text{H}]^+$  calculated for  $\text{C}_{21}\text{H}_{20}\text{NO}_4\text{S}_2$  for 414.0828 found: 414.0820

## *tert*-butyl((2R)-1-oxo-1-(4-phenyl-3-(phenylthio)-1,2-oxazetidin-2-yl)propan-2-yl)carbamate (33)

To a cooled ( $0^{\circ}\text{C}$ ) solution of Boc Alanine (50  $\mu$ L, 0.25 mmol), HBTU (2-(1*H*-benzotriazol-1-yl)-1,1,3,3-tetramethyluronium hexafluorophosphate (193 $\mu$ L, 0.5 mmol) and NMM (*N*-Methylmorpholine) (123  $\mu$ L, 0.6 mmol) in DMF were added under dry conditions. After stirring for 15 min, 4-phenyl-3-(phenylthio)-1,2-oxazetidine (61  $\mu$ L, 0.25 mmol) was added with continuous stirring for 24 hours at room temperature. After the completion of reaction, as monitored by TLC, the reaction mixture was extracted with ethyl acetate and water. The aqueous

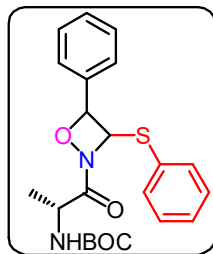

layers were then washed with sodium bicarbonate ( $\text{NaHCO}_3$ ) and again extracted with ethyl acetate. The combined organic layers were dried over  $\text{Na}_2\text{SO}_4$  and concentrated under vacuum. The crude mixture was purified by silica gel column chromatography using (hexane/ethyl acetate 80:20) as a colourless oil (144 mg, 35% yield).  $^1\text{H}$  NMR (400 MHz,  $\text{CDCl}_3$ )  $\delta$  - 7.41 (d,  $J$  = 3.3 Hz, 4H), 7.36 (s, 5H), 7.32 (d,  $J$  = 8.1 Hz, 5H), 7.27 (t,  $J$  = 4.9 Hz, 6H), 4.90 (d,  $J$  = 4.9 Hz, 1H), 4.75 – 4.69 (m, 2H), 4.42 (s, 1H), 3.87 (d,  $J$  = 6.4 Hz, 2H), 3.82 (d,  $J$  = 6.6 Hz, 1H), 3.58 – 3.56 (m, 2H), 3.41 – 3.37 (m, 2H), 1.48 (s, 6H), 1.41 (s, 9H), 0.90 (d,  $J$  = 2.3 Hz, 3H), 0.88 (s, 3H).  $^{13}\text{C}\{^1\text{H}\}$  (100 MHz,  $\text{CDCl}_3$ )  $\delta$  - 155.6, 151.5, 139.8, 139.5, 133.6, 133.0, 132.6, 131.8, 129.3, 128.5, 128.5, 128.5, 128.4, 128.3, 126.9, 126.8, 84.8, 79.7, 77.0, 76.4, 76.0, 75.3, 71.8, 71.4, 66.2, 61.8, 46.8, 45.4, 28.4, 28.0, 27.7, 19.0. (ESI) (m/z):  $[\text{M}+\text{H}]^+$  calculated for  $\text{C}_{22}\text{H}_{27}\text{N}_2\text{O}_4\text{S}$  415.1686; found: 415.1675.

## *tert*-butyl 4-phenyl-3-(phenylthio)-1,2-oxazetidine-2-carboxylate (34)

To an oven dried 50 ml glass vial, containing starting compound 4-phenyl-3-(phenylthio)-1,2-oxazetidine (50  $\mu$ L, 0.2 mmol) in THF was added Boc anhydride (87  $\mu$ L, 0.40 mmol), triethylamine (20  $\mu$ L, 0.20 mmol) and DMAP (20  $\mu$ L, 0.20 mmol) with continuous stirring for

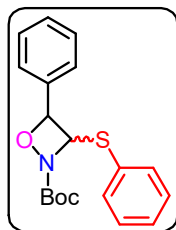

12 hours at room temperature. After the completion of reaction, as monitored by TLC, the reaction mixture was extracted with ethyl acetate and water. The aqueous layers were then washed with sodium bicarbonate ( $\text{NaHCO}_3$ ) and again extracted with ethyl acetate. The combined organic layers were dried over  $\text{Na}_2\text{SO}_4$  and concentrated under vacuum. The crude mixture was purified by silica gel column chromatography using (hexane/ethyl acetate 99:1) as a colourless oil (63 mg, 90% yield).  $^1\text{H}$  NMR (400 MHz,  $\text{CDCl}_3$ )  $\delta$  - 7.48 – 7.45 (m, 2H), 7.44 – 7.41 (m, 5H), 7.38 (dt,  $J$  = 7.9, 2.6 Hz, 8H), 7.32 (dd,  $J$  = 4.1, 2.1 Hz, 5H), 5.75 (d,  $J$  = 6.2 Hz, 1H), 5.72 (d,  $J$  = 5.7 Hz, 1H), 4.89 (d,  $J$  = 5.7 Hz, 1H), 4.86 (d,  $J$  = 6.2 Hz, 1H), 1.48 (s, 9H), 1.47 (s, 9H).  $^{13}\text{C}\{^1\text{H}\}$  (100 MHz,  $\text{CDCl}_3$ )  $\delta$  - 152.4, 152.3, 136.0, 135.8, 133.7, 133.4, 131.9, 131.9, 129.3, 129.1, 129.0, 128.8, 128.7, 128.7, 128.6, 128.5, 127.4, 127.3, 83.2, 83.1, 78.9, 78.6, 73.9, 73.7, 27.8, 27.7. (ESI) (m/z):  $[\text{M}+\text{Na}]^+$  calculated for  $\text{C}_{19}\text{H}_{21}\text{NO}_3\text{NaS}$  366.1134; found: 366.1140

### **tert-butyl (2-oxo-2-phenylethyl)carbamate (35)**

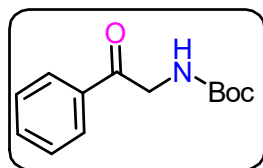

To an oven-dried 50 ml glass vial, containing starting compound tert-butyl 4-phenyl-3-(phenylthio)-1,2-oxazetidine-2-carboxylate (50  $\mu\text{L}$ , 0.145 mmol) in dry THF was added triphenylphosphine (76  $\mu\text{L}$ , 0.29 mmol) under argon with continuous stirring for 12 hours at room temperature. After the completion of reaction, as monitored by TLC, the reaction mixture was extracted with ethyl acetate and water. The aqueous layers were then washed with sodium bicarbonate ( $\text{NaHCO}_3$ ) and again extracted with ethyl acetate. The combined organic layers were dried over  $\text{Na}_2\text{SO}_4$  and concentrated under vacuum. The crude mixture was purified by silica gel column chromatography using (hexane/ethyl acetate 99:1) as a white solid (24 mg, 80% yield).  $^1\text{H}$  NMR (400 MHz,  $\text{CDCl}_3$ )  $\delta$  7.90 – 7.87 (m, 2H), 7.54 (ddd,  $J$  = 6.9, 4.0, 1.2 Hz, 1H), 7.42 (dd,  $J$  = 10.6, 4.7 Hz, 2H), 5.49 (s, 1H), 4.60 (d,  $J$  = 4.5 Hz, 2H), 1.41 (s, 9H).  $^{13}\text{C}\{^1\text{H}\}$  (100 MHz,  $\text{CDCl}_3$ )  $\delta$  - 194.5, 155.8, 134.5, 134.0, 128.9, 127.8, 79.9, 47.5, 28.4. (ESI) (m/z):  $[\text{M}+\text{Na}]^+$  calculated for  $\text{C}_{13}\text{H}_{17}\text{NO}_3\text{Na}$  258.1101; found: 258.1106

### **(E)-phenyl(styryl)sulfane (1d)**

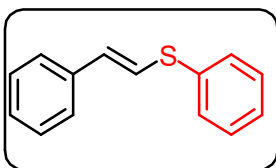

$^1\text{H}$  NMR (400 MHz,  $\text{CDCl}_3$ )  $\delta$  7.39 (dd,  $J$  = 5.6, 3.7 Hz, 2H), 7.30 (dd,  $J$  = 8.3, 6.5 Hz, 6H), 7.24 – 7.19 (m, 2H), 6.89 – 6.81 (m, 1H), 6.74 – 6.66 (m, 1H).  $^{13}\text{C}\{^1\text{H}\}$  (100 MHz,  $\text{CDCl}_3$ )  $\delta$  - 136.6, 135.4, 131.9, 129.9, 129.3, 128.8, 127.7, 127.1, 126.1, 123.5. (ESI) (m/z):  $[\text{M}+\text{H}]^+$  calculated for  $\text{C}_{14}\text{H}_{13}\text{S}$  213.0732; found: 213.0735

## NMR Spectra

### $^1\text{H}$ -NMR ( $\text{CDCl}_3$ , 400 MHz) Spectra of compound **1**

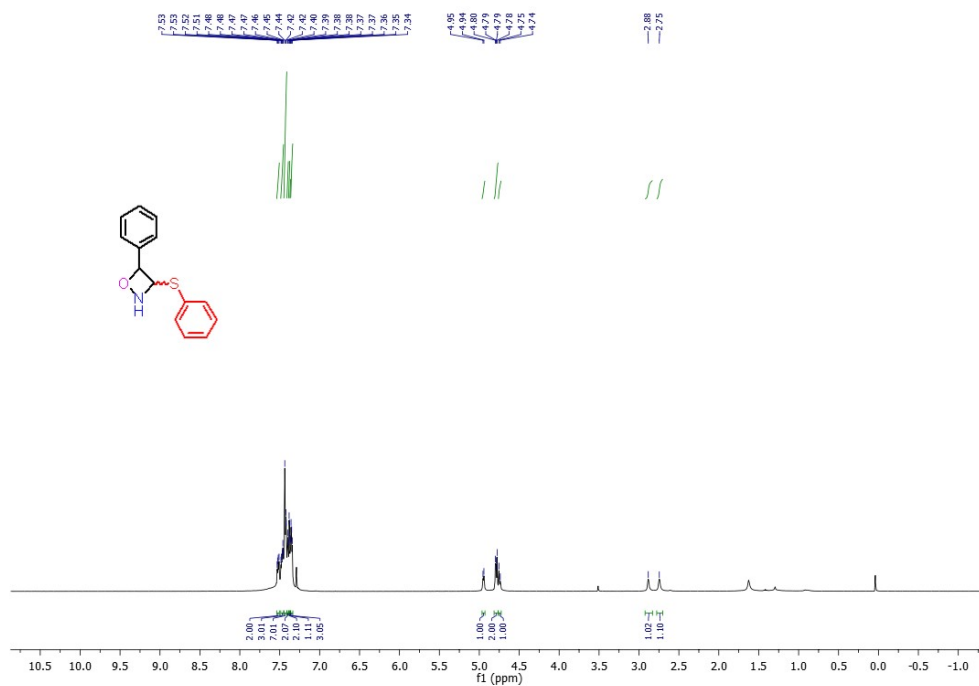

### $^{13}\text{C}\{^1\text{H}\}$ NMR ( $\text{CDCl}_3$ , 125 MHz) spectra of compound **1**

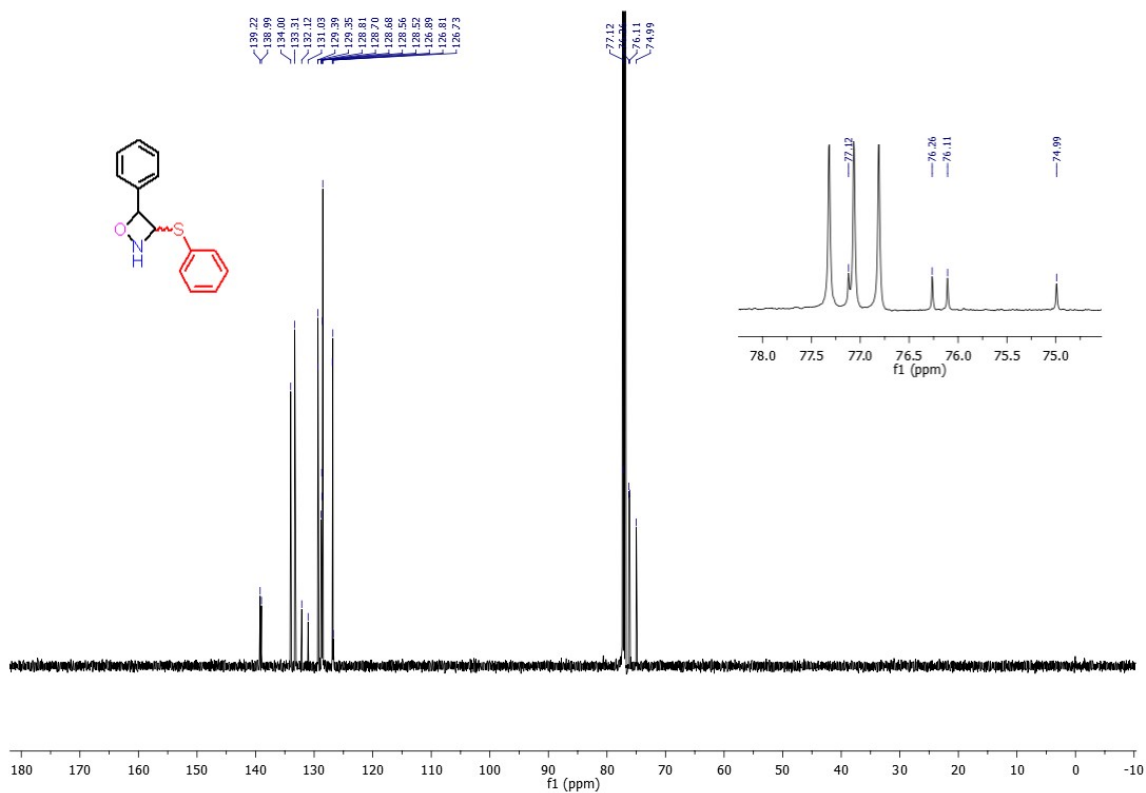

# <sup>1</sup>H-NMR (D<sub>2</sub>O, 400 MHz) Spectra of compound **1**

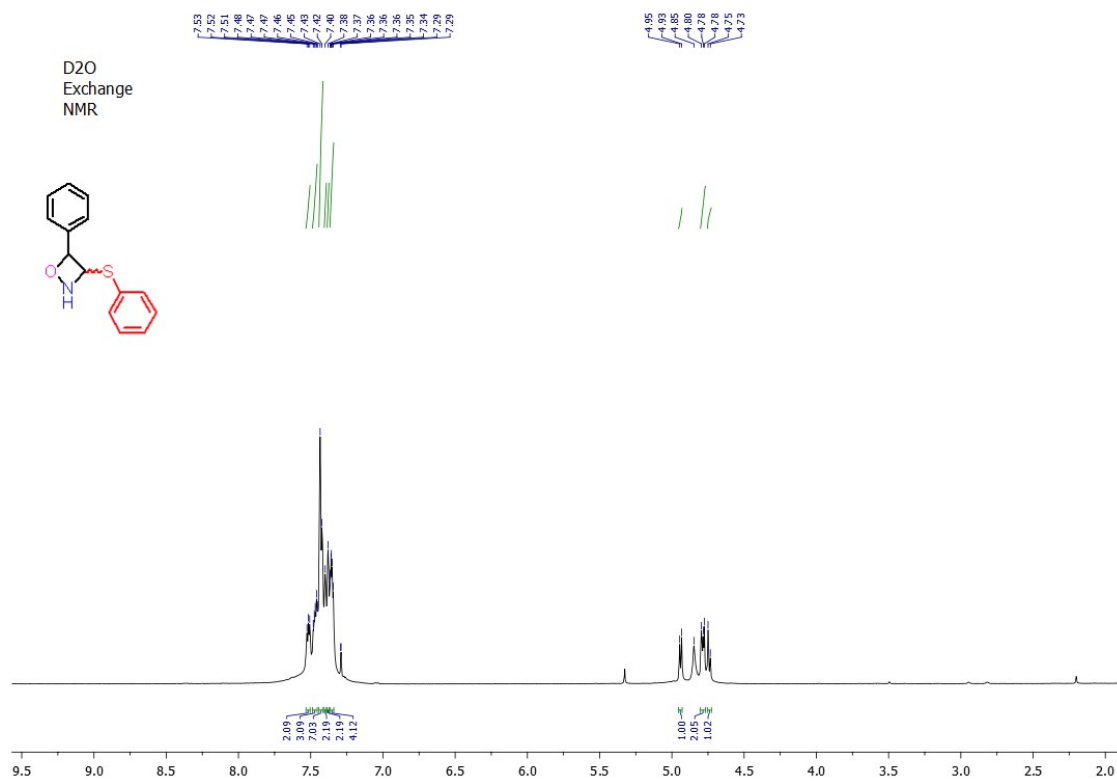

## <sup>13</sup>C DEPT NMR (CDCl<sub>3</sub>, 125 MHz) spectra of compound **1**

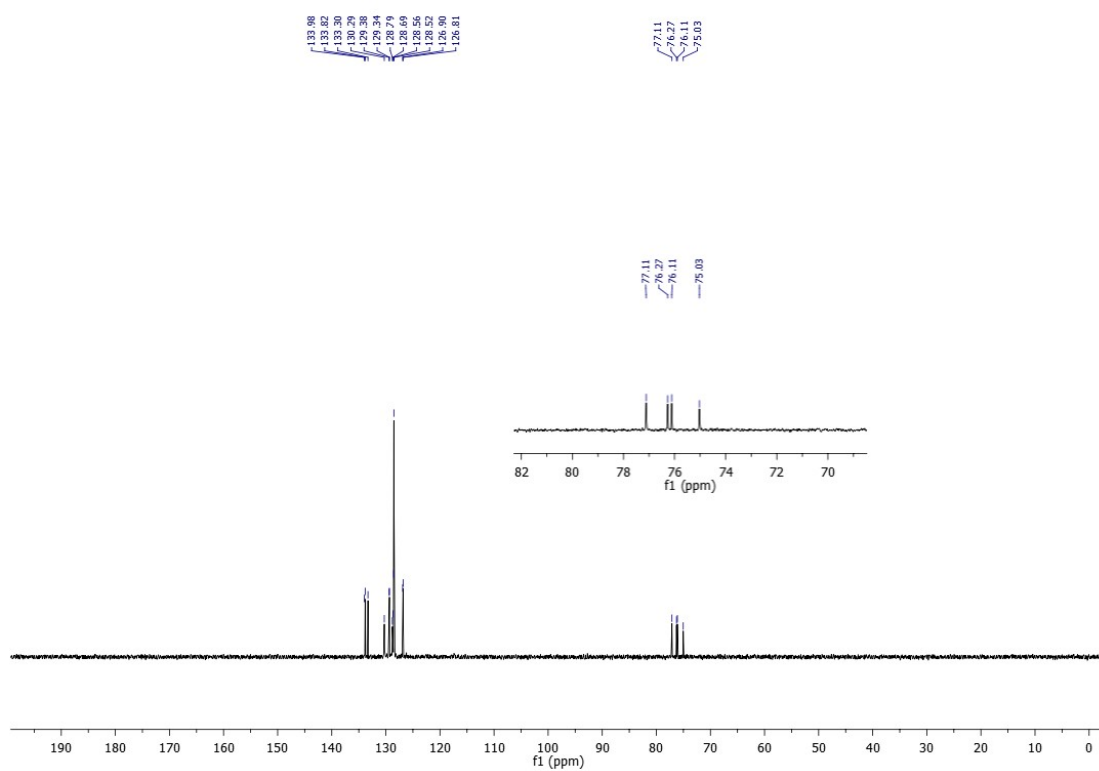

<sup>1</sup>H-NMR (CDCl<sub>3</sub>, 400 MHz) Spectra of compound 2

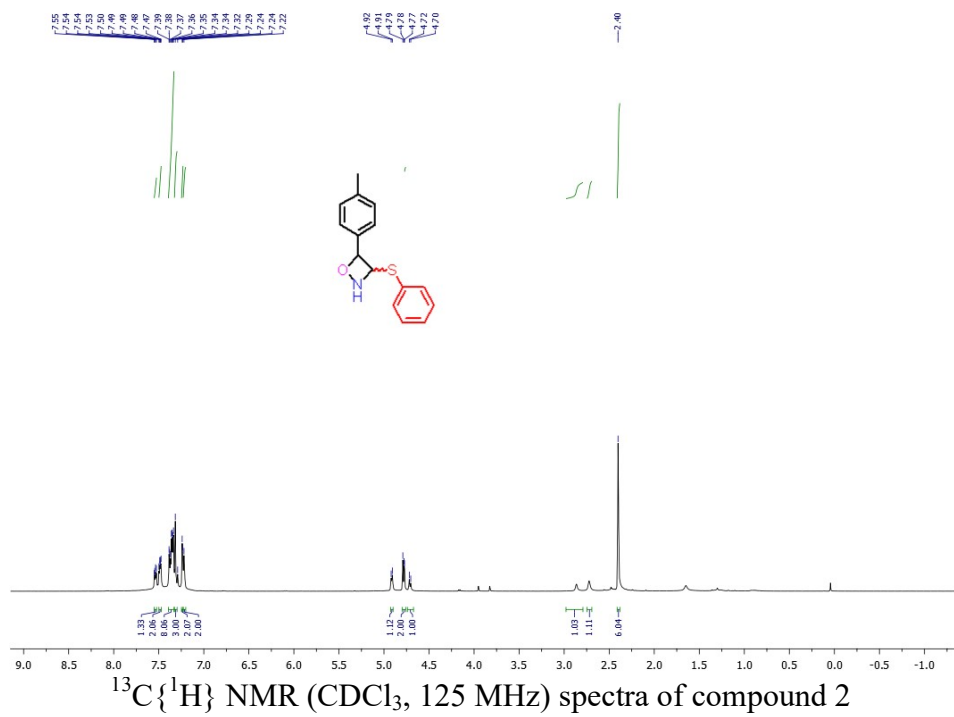

<sup>13</sup>C{<sup>1</sup>H} NMR (CDCl<sub>3</sub>, 125 MHz) spectra of compound 2

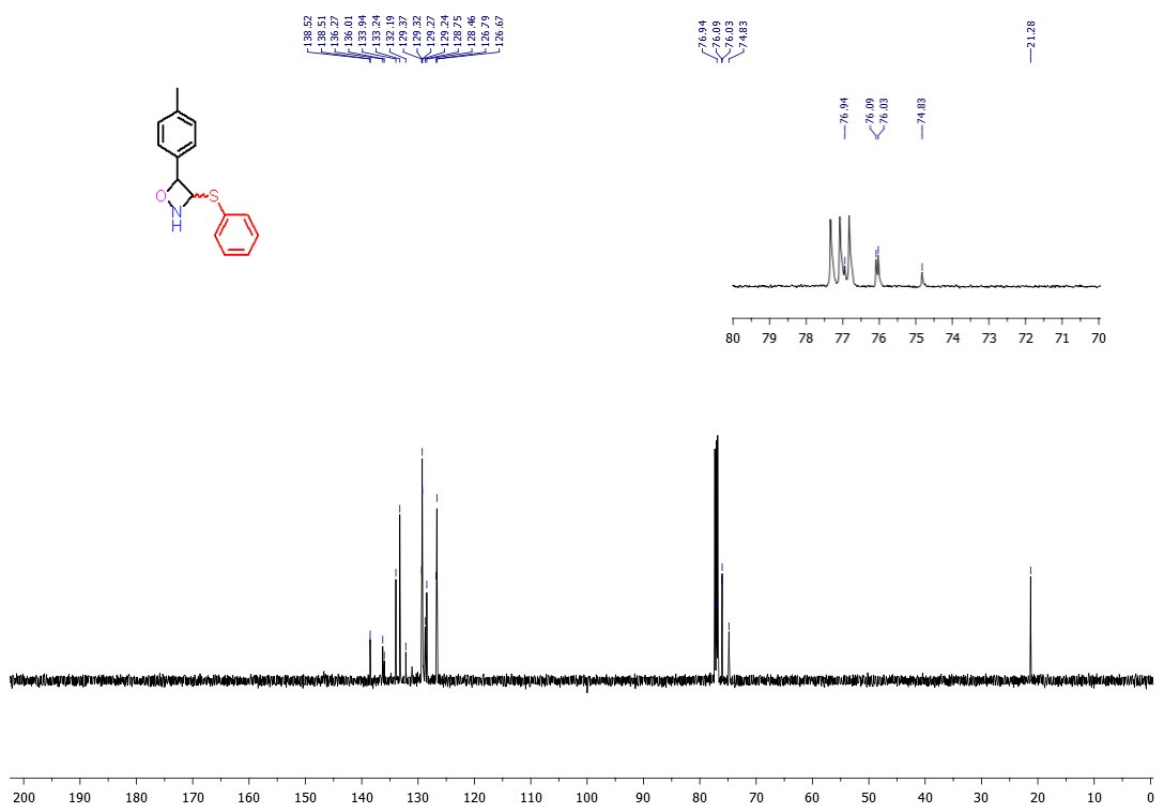

<sup>1</sup>H-NMR (CDCl<sub>3</sub>, 400 MHz) Spectra of compound **3**

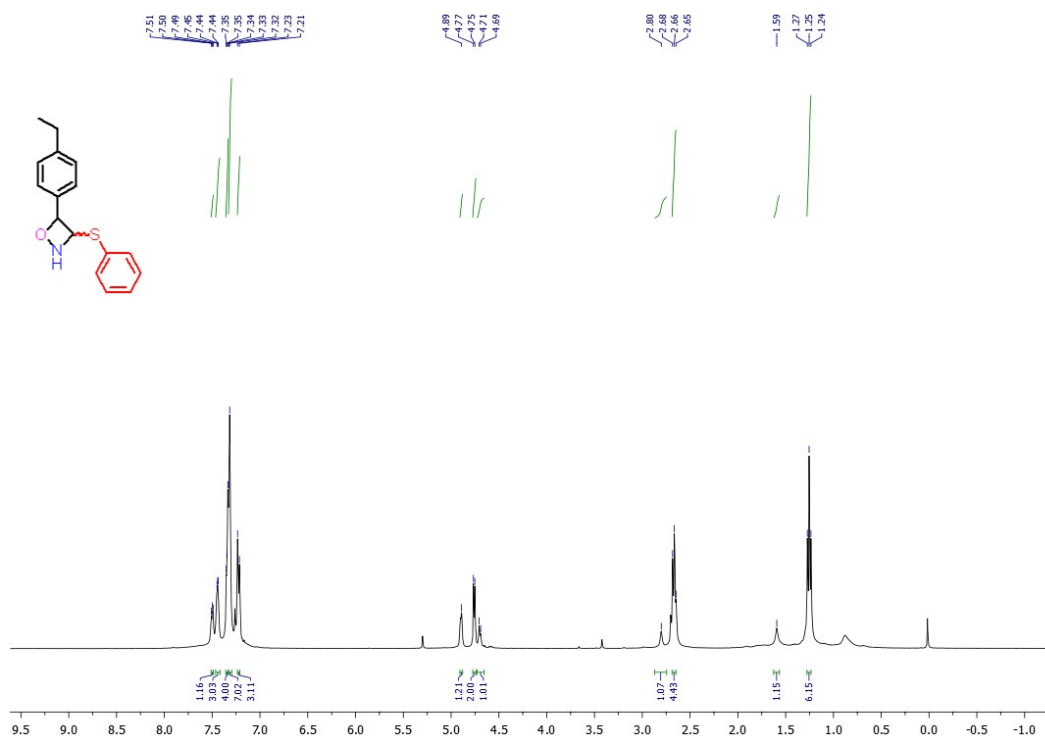

$^{13}\text{C}\{^1\text{H}\}$  NMR ( $\text{CDCl}_3$ , 125 MHz) spectra of compound **3**

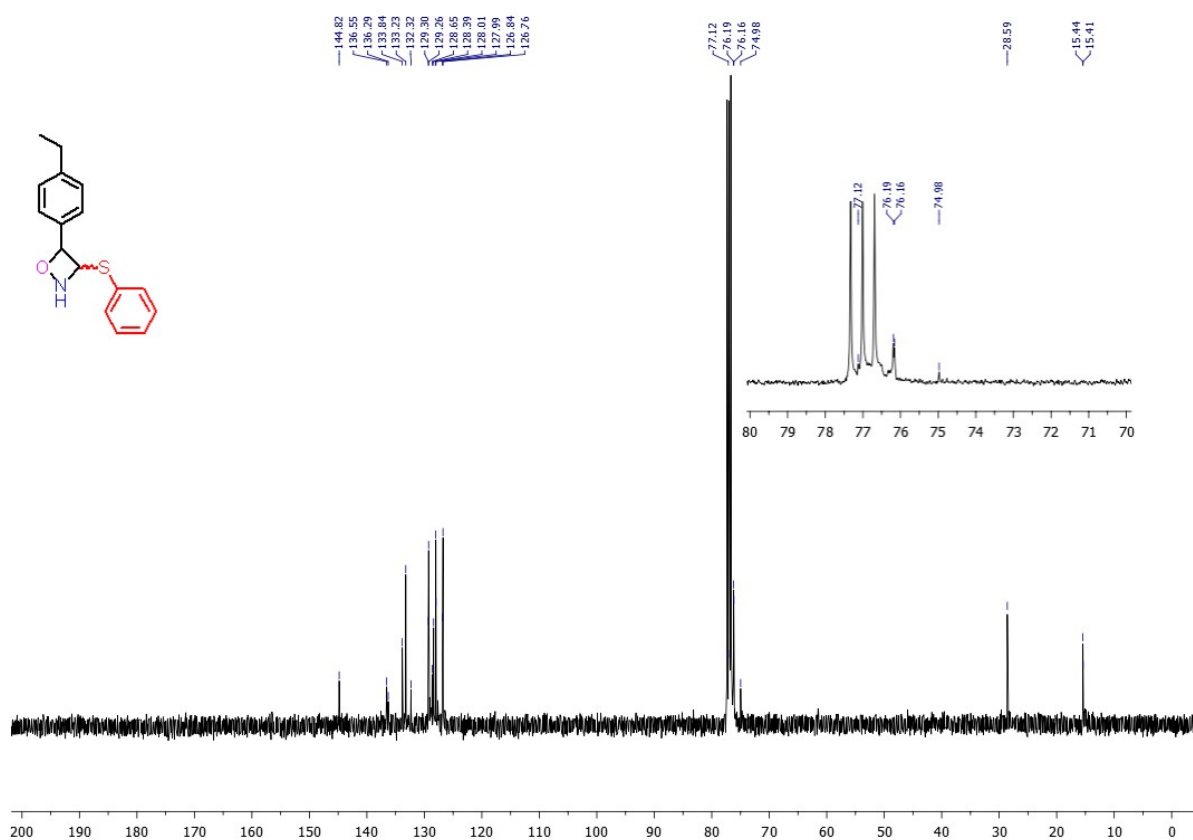

$^1\text{H}$ -NMR ( $\text{CDCl}_3$ , 400 MHz) Spectra of compound **4**



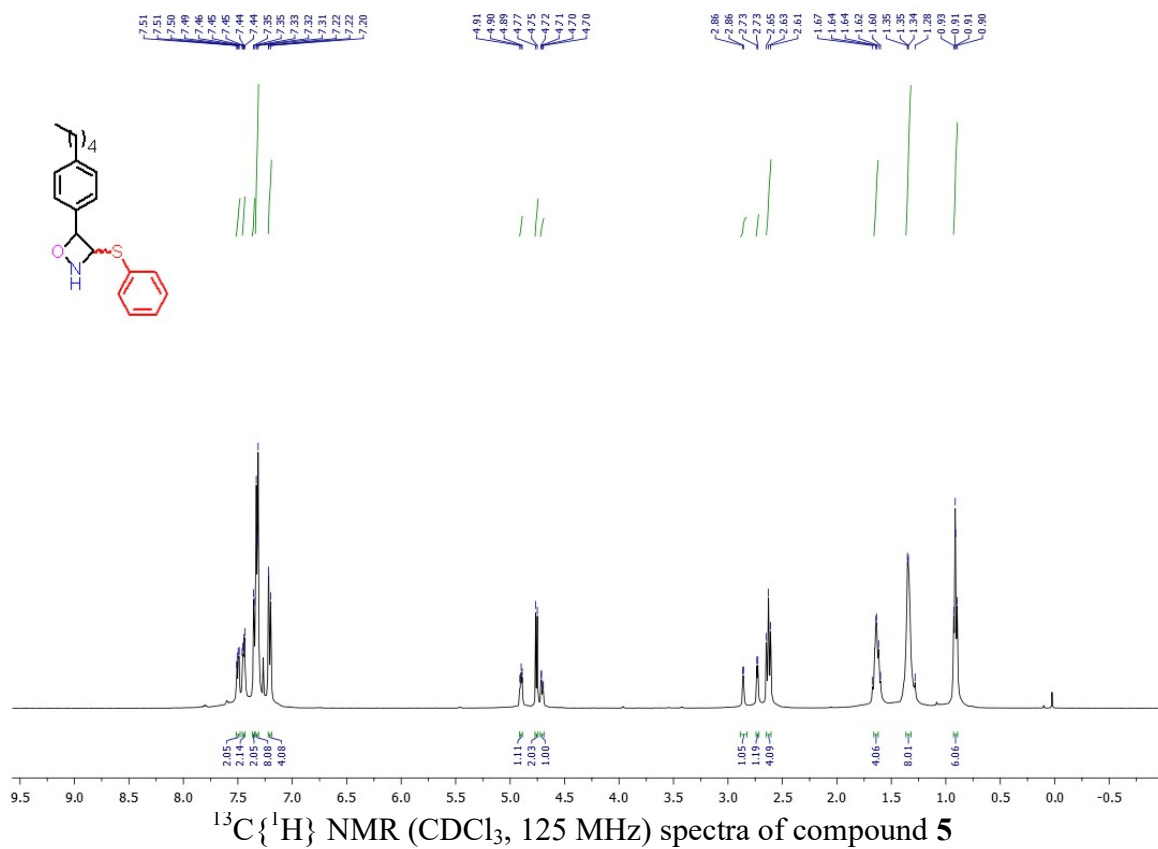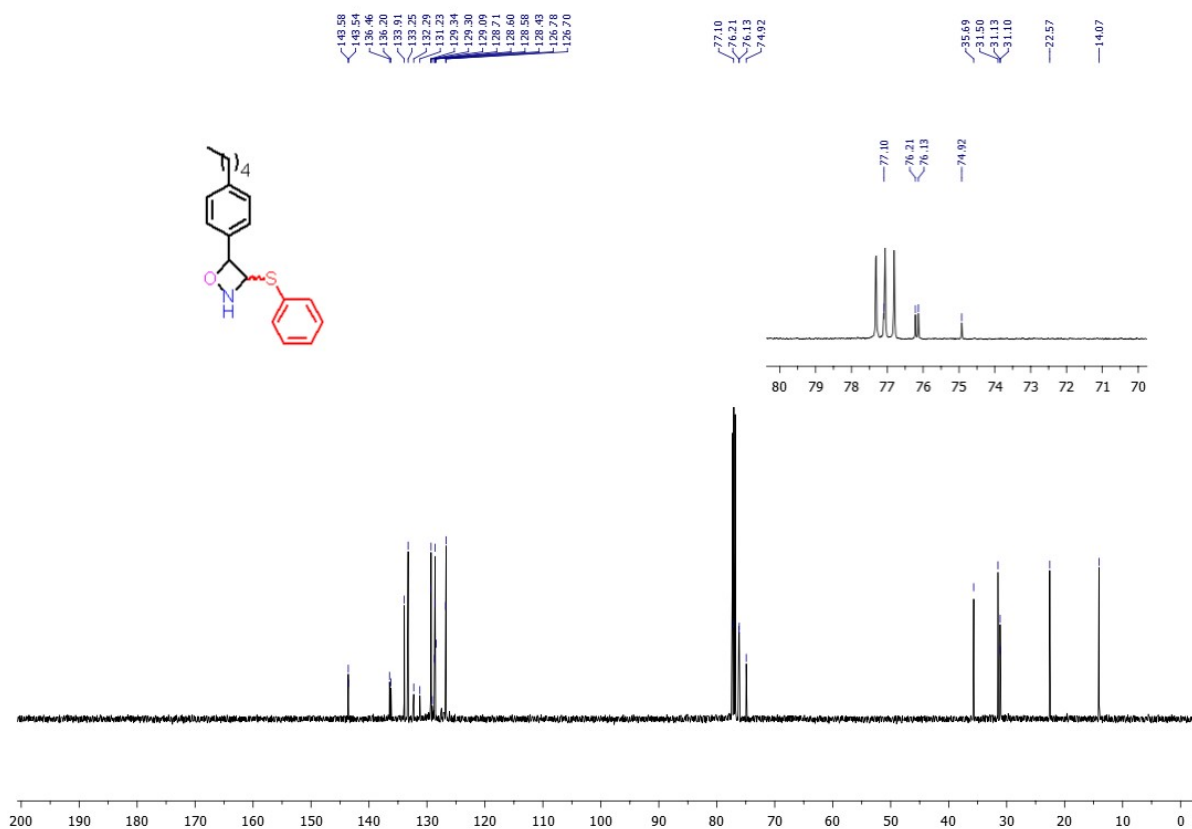

<sup>1</sup>H-NMR (CDCl<sub>3</sub>, 400 MHz) Spectra of compound **6**

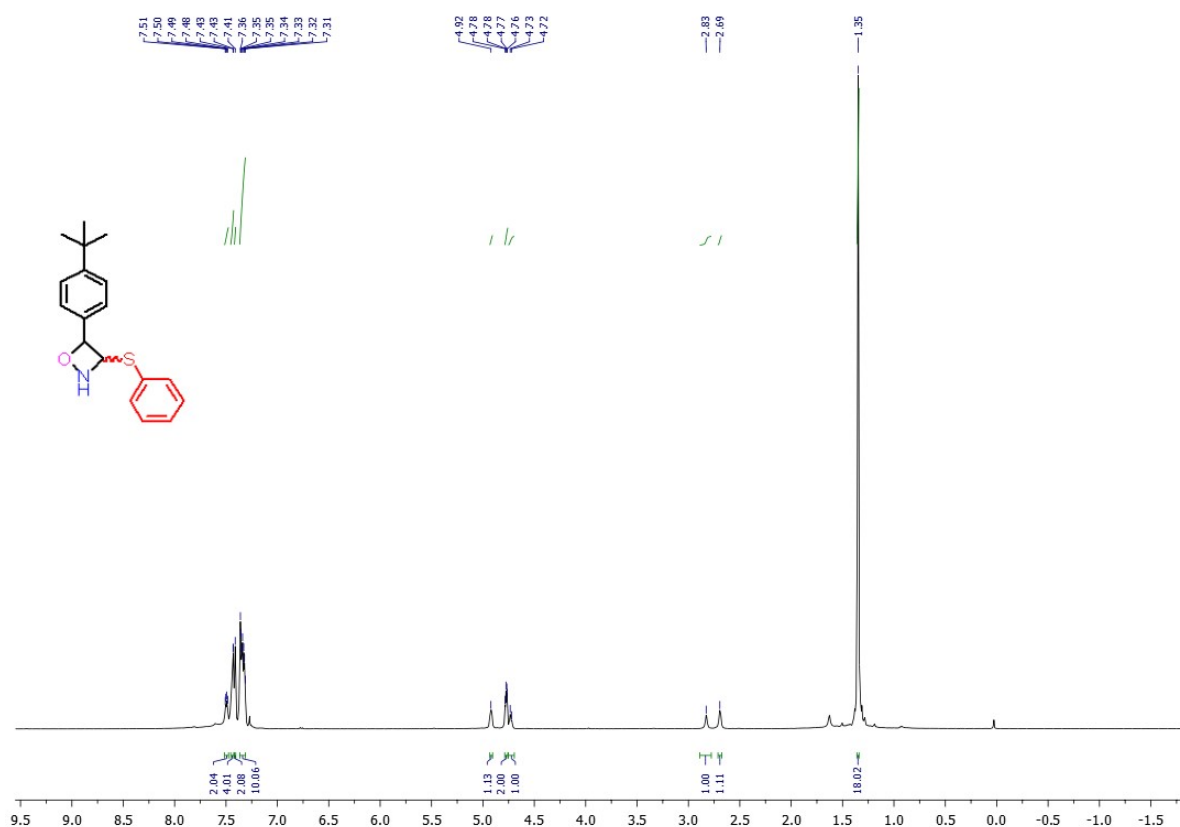

<sup>13</sup>C{<sup>1</sup>H} NMR (CDCl<sub>3</sub>, 100 MHz) spectra of compound **6**

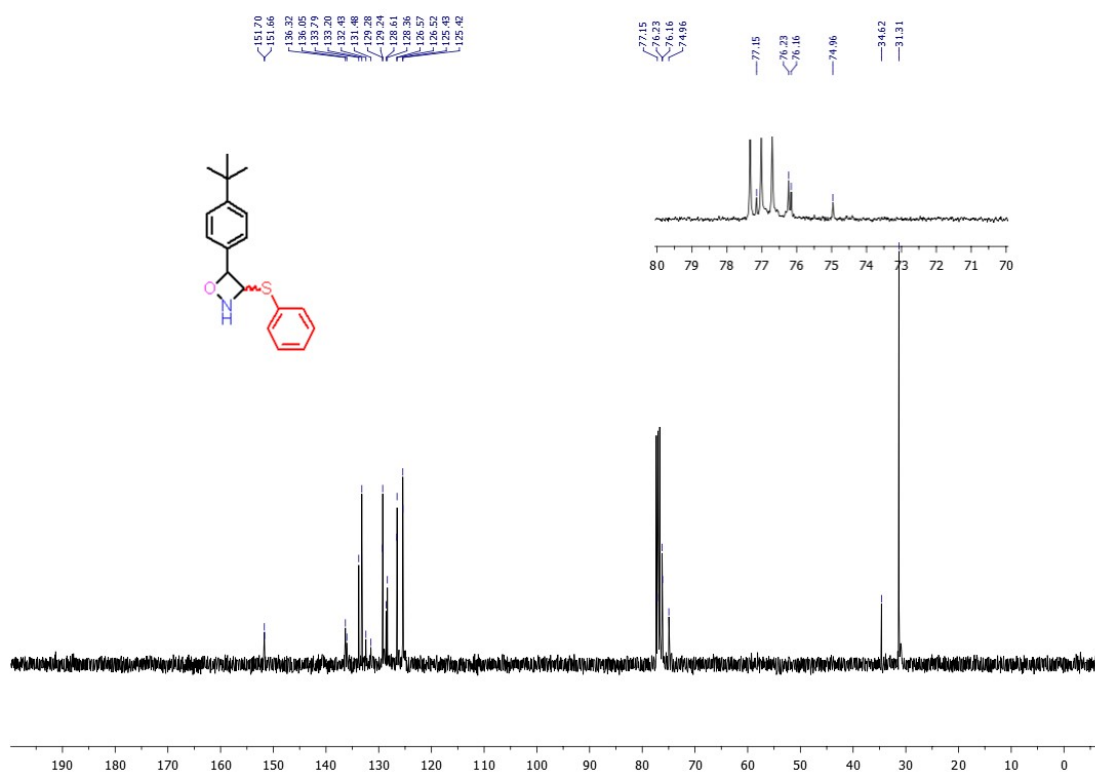

7.46  
7.45  
7.36  
7.36  
7.35  
7.34  
7.30  
7.29  
7.28  
7.24  
7.24  
7.23  
7.20  
7.19  
6.86  
6.85

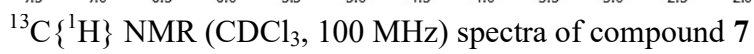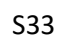

<sup>1</sup>H-NMR (CDCl<sub>3</sub>, 400 MHz) Spectra of compound **8**

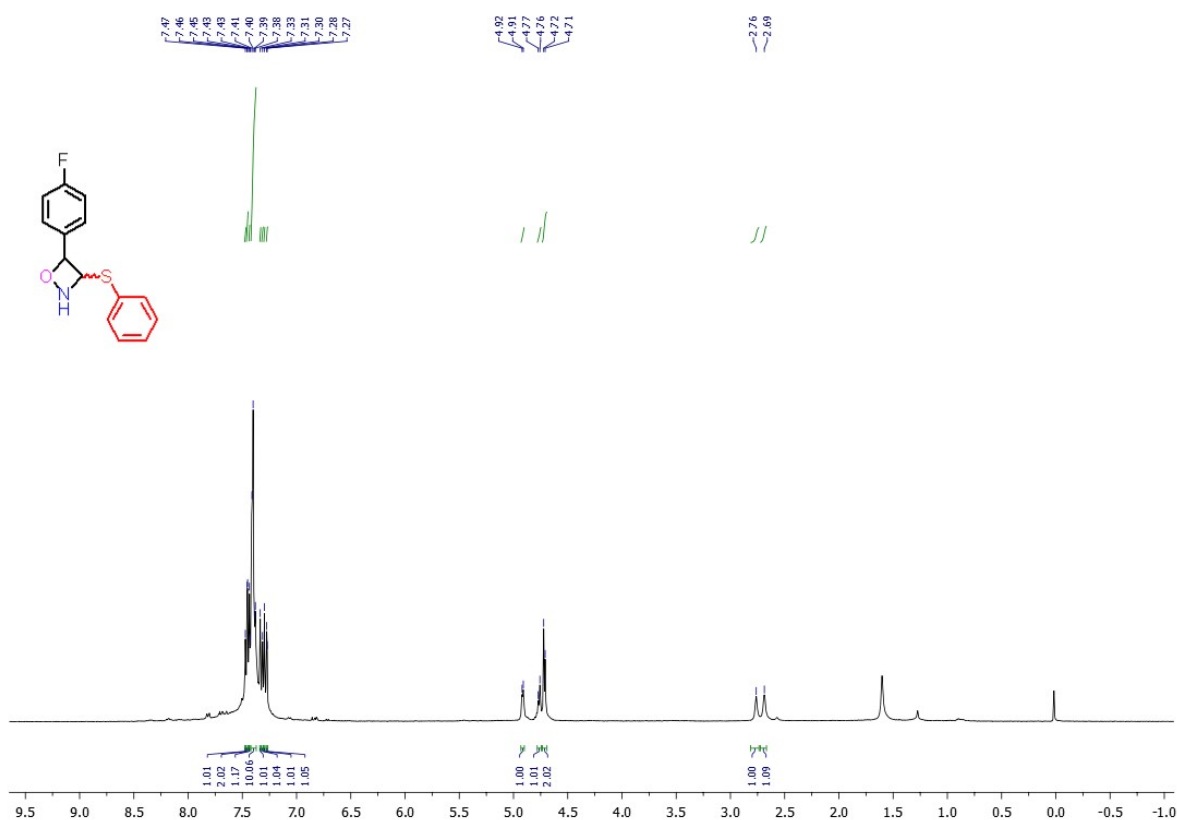

<sup>13</sup>C{<sup>1</sup>H} NMR (CDCl<sub>3</sub>, 100 MHz) spectra of compound **8**

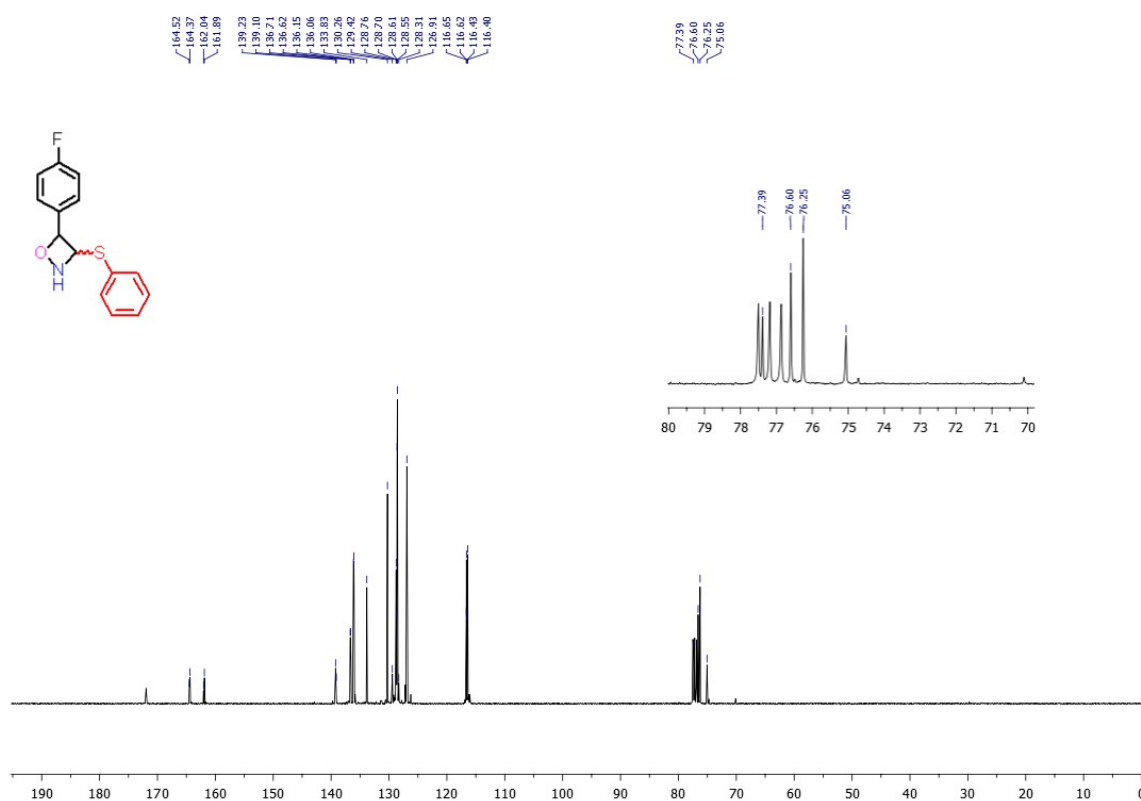

$^{19}\text{F}$ -NMR ( $\text{CDCl}_3$ , 377 MHz) spectra of compound **8**

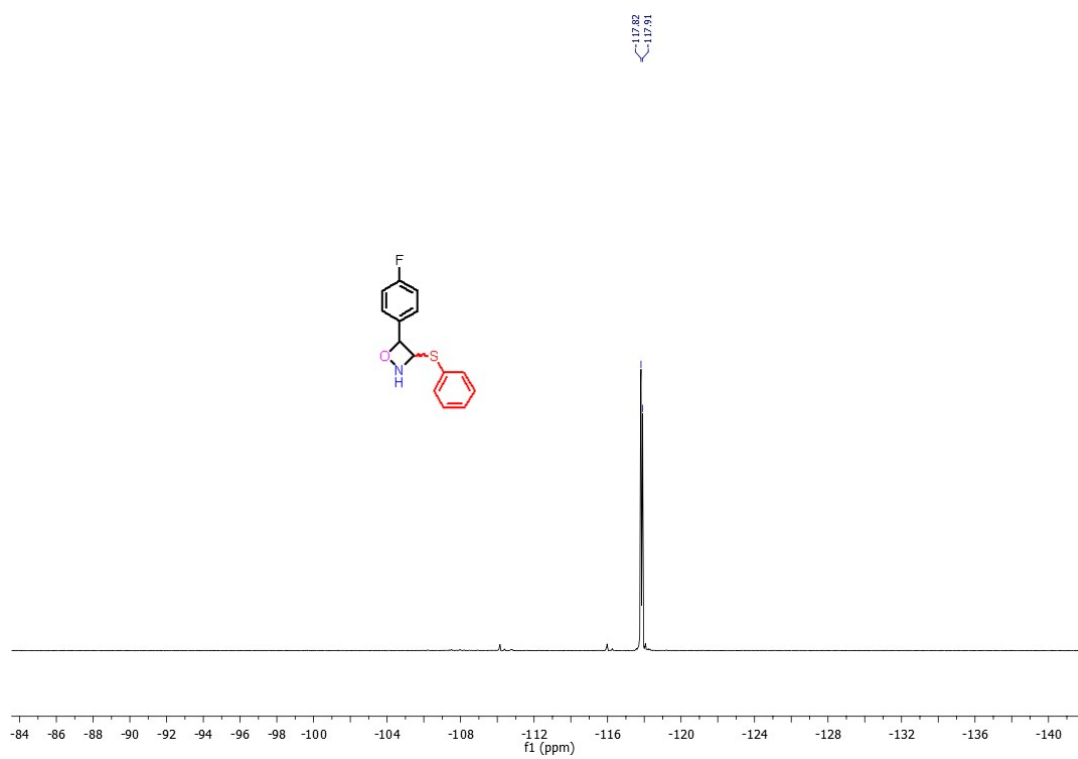

<sup>1</sup>H-NMR (CDCl<sub>3</sub>, 400 MHz) Spectra of compound **9**

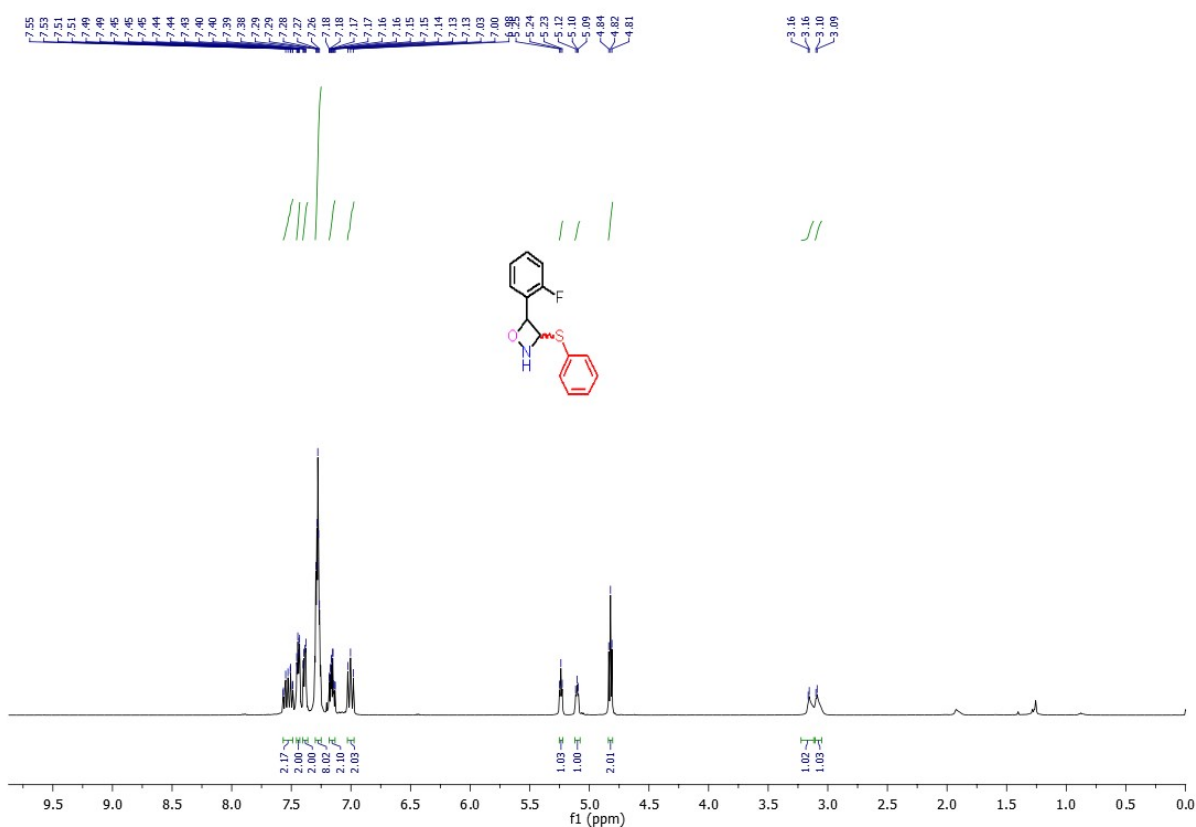

<sup>13</sup>C{<sup>1</sup>H} NMR (CDCl<sub>3</sub>, 100 MHz) spectra of compound **9**

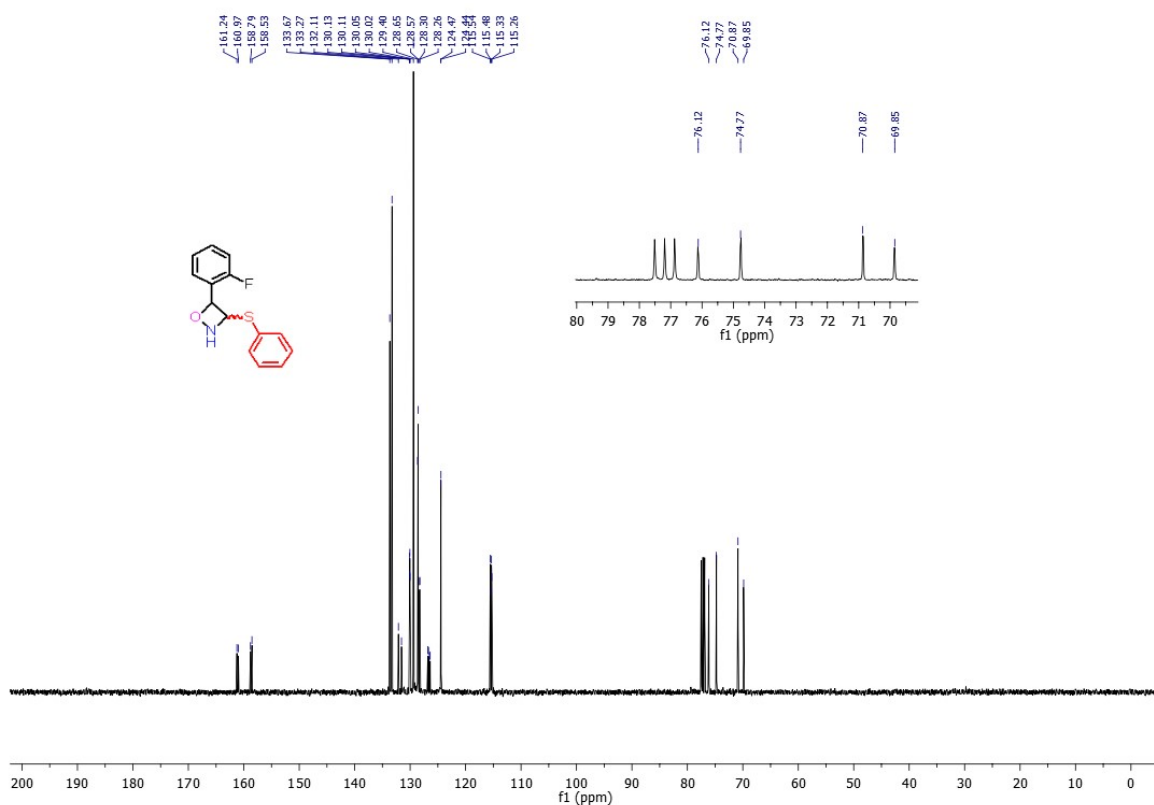

$^{19}\text{F}$ -NMR ( $\text{CDCl}_3$ , 377 MHz) spectra of compound **9**

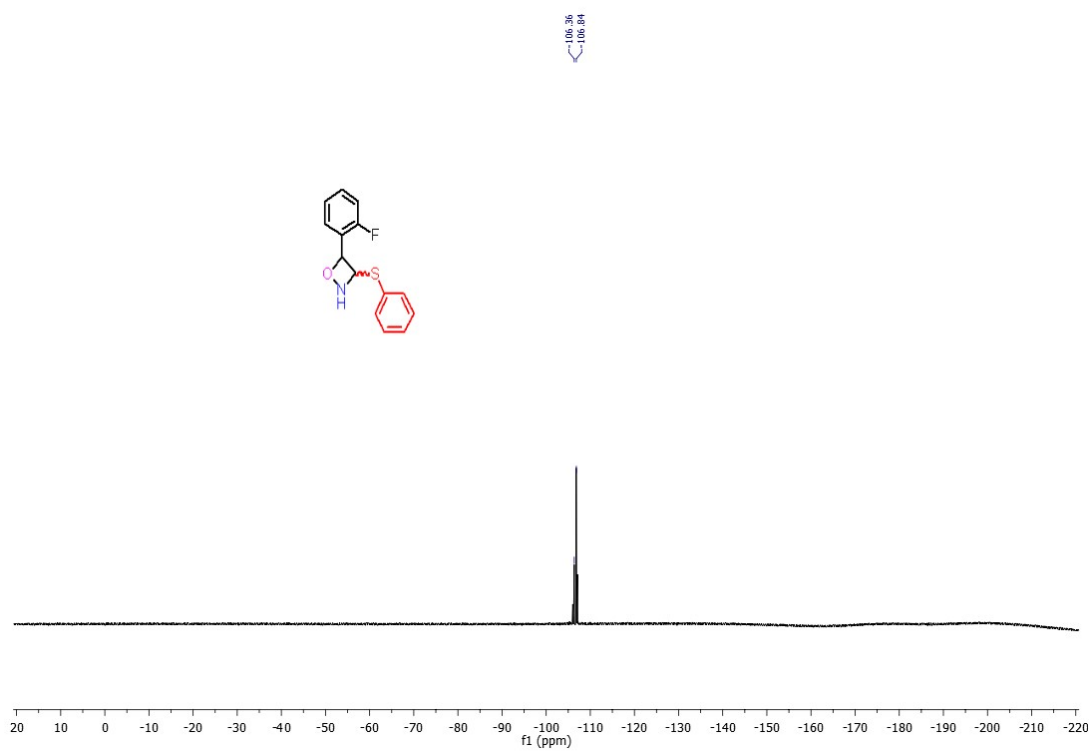

<sup>1</sup>H-NMR (CDCl<sub>3</sub>, 400 MHz) Spectra of compound **10**

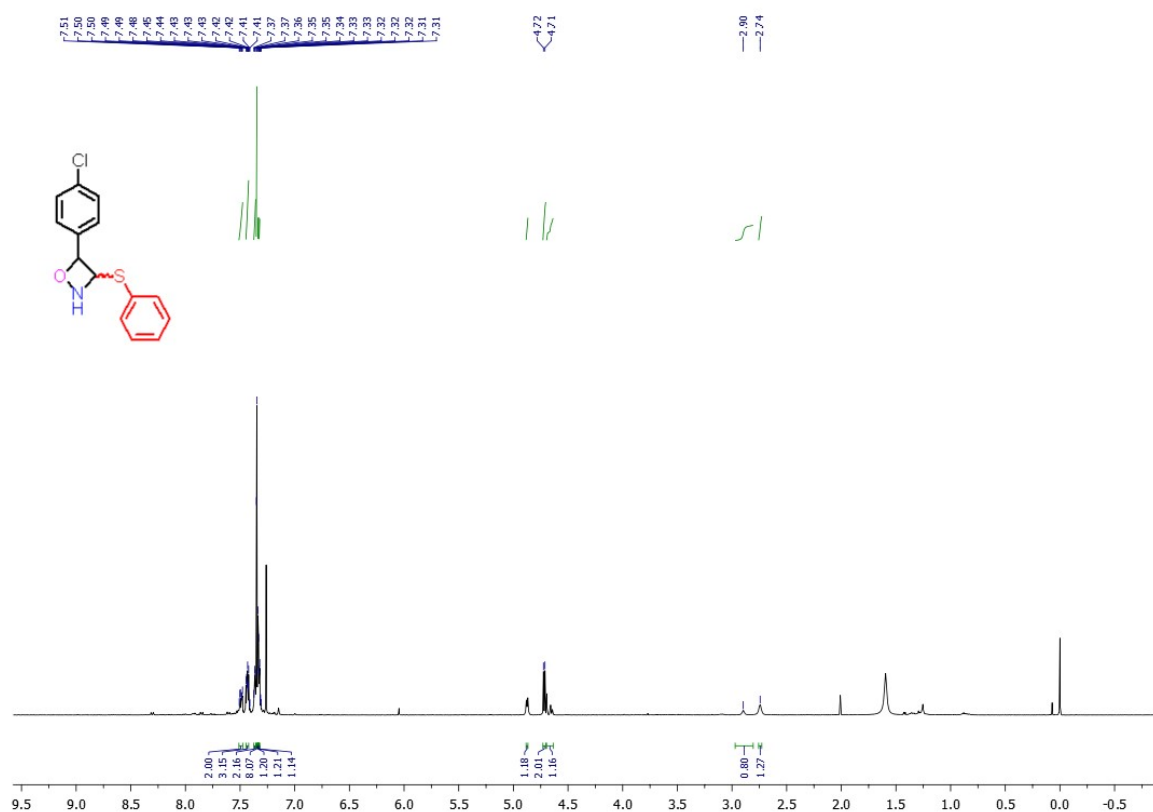

<sup>13</sup>C{<sup>1</sup>H} NMR (CDCl<sub>3</sub>, 100 MHz) spectra of compound **10**

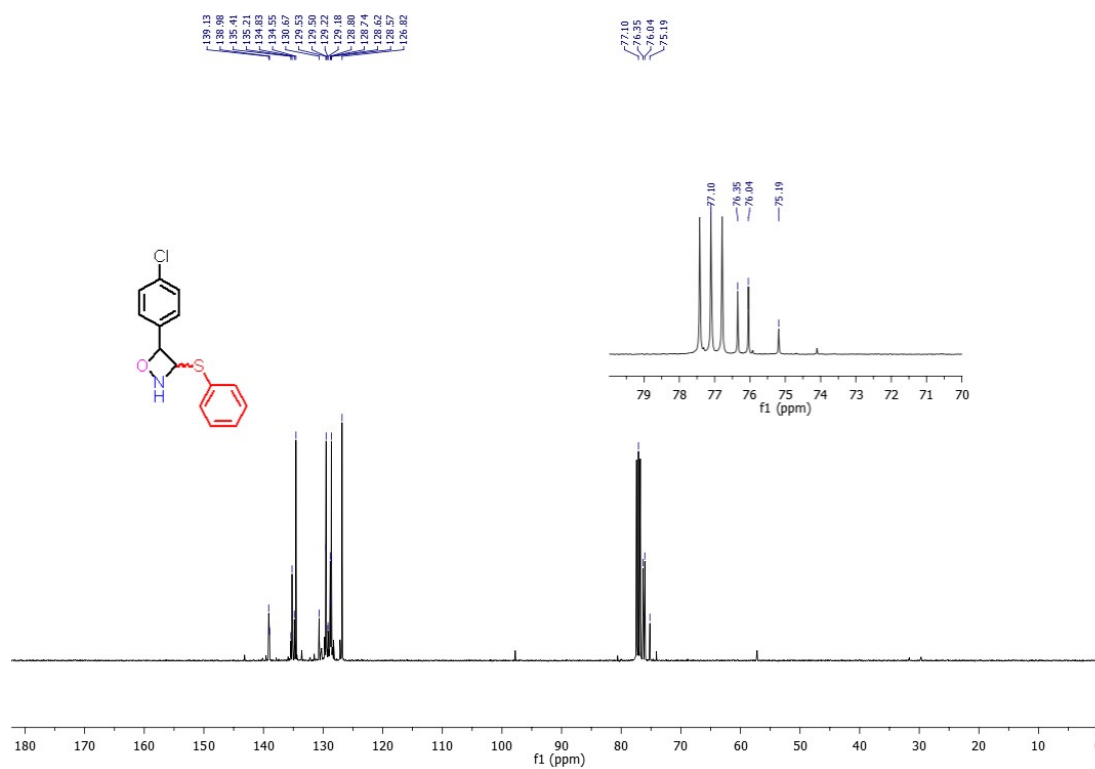

$^1\text{H}$ -NMR ( $\text{CDCl}_3$ , 400 MHz) Spectra of compound **11**

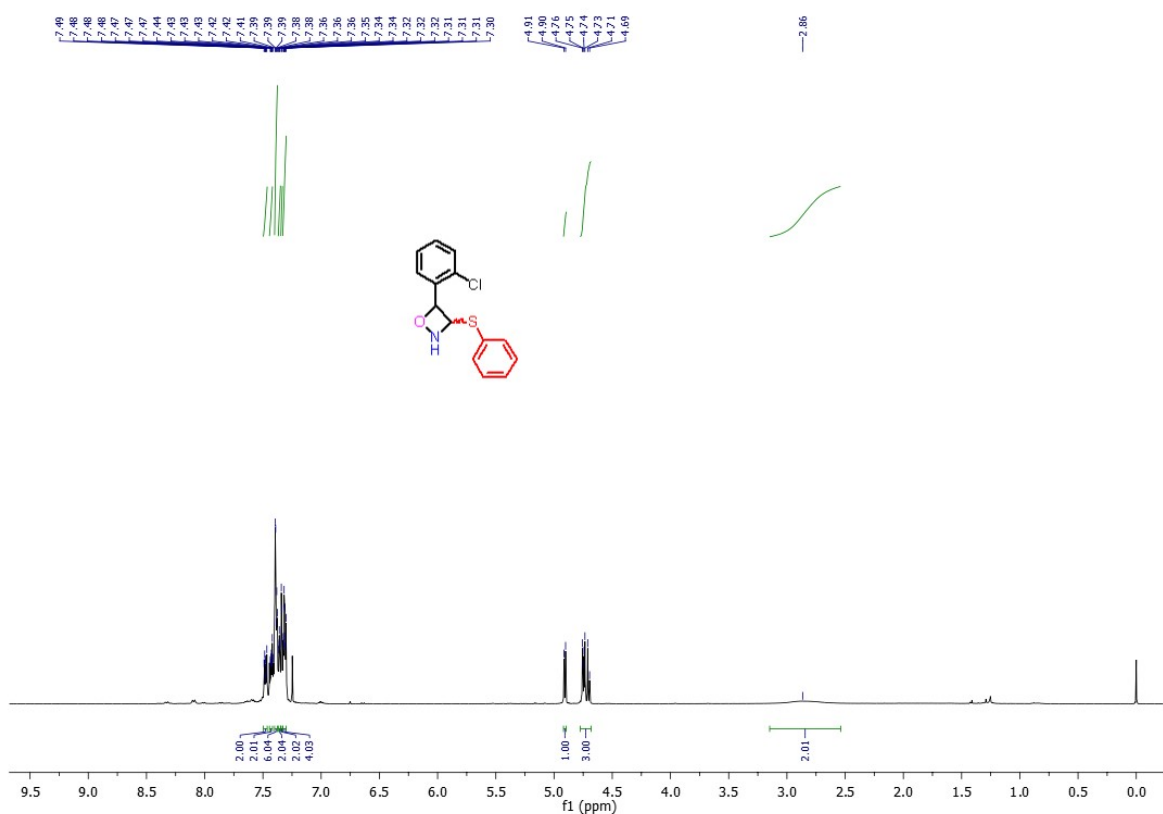

$^{13}\text{C}\{^1\text{H}\}$  NMR ( $\text{CDCl}_3$ , 100 MHz) spectra of compound **11**

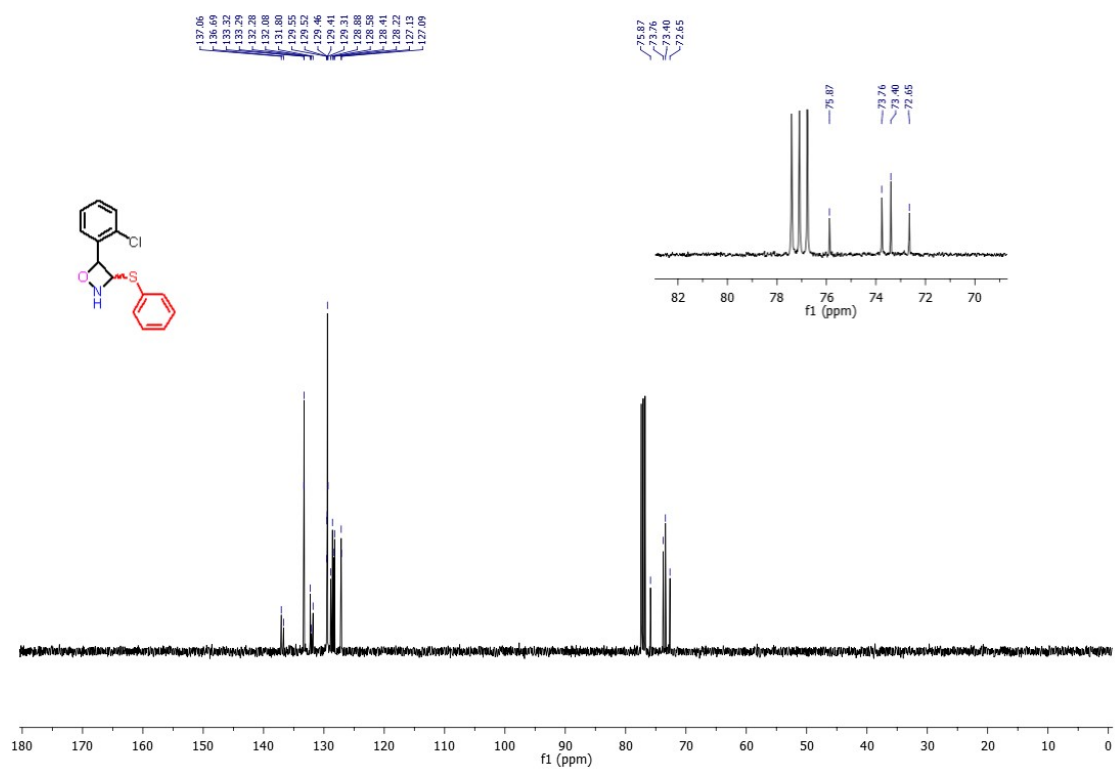

<sup>1</sup>H-NMR (CDCl<sub>3</sub>, 400 MHz) Spectra of compound **12**

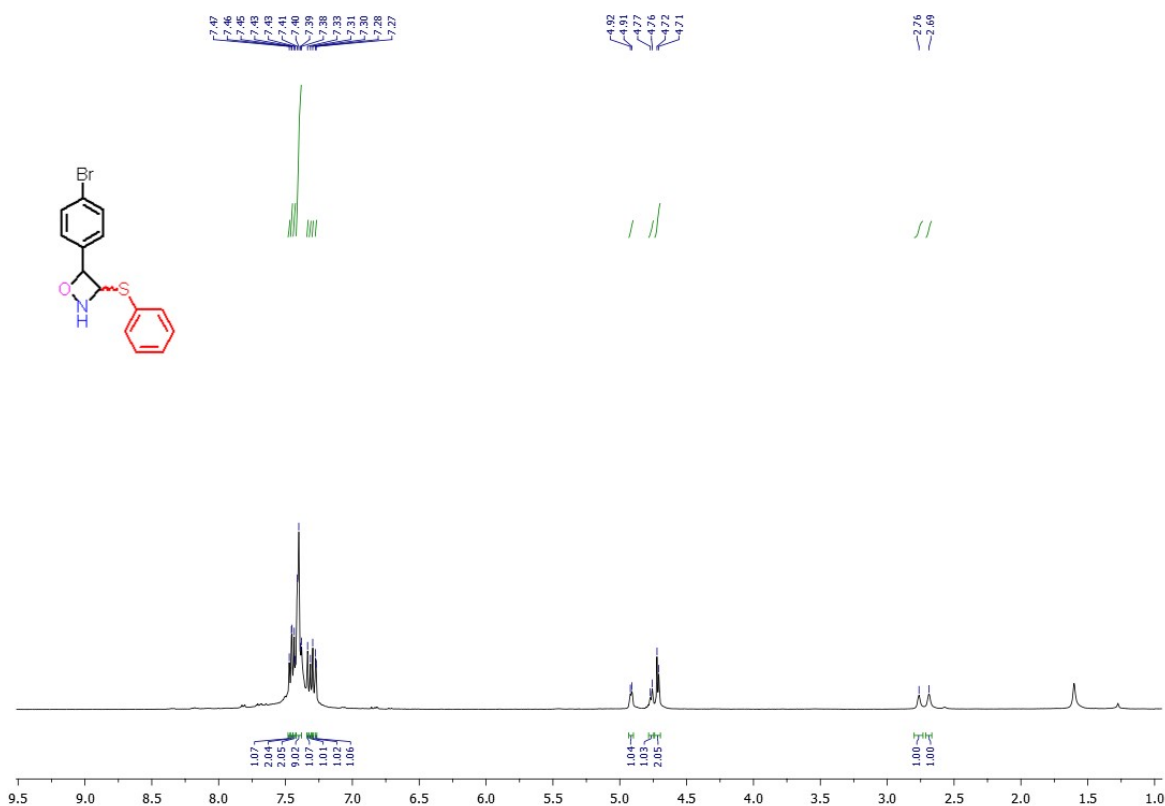

<sup>13</sup>C{<sup>1</sup>H} NMR (CDCl<sub>3</sub>, 100 MHz) spectra of compound **12**

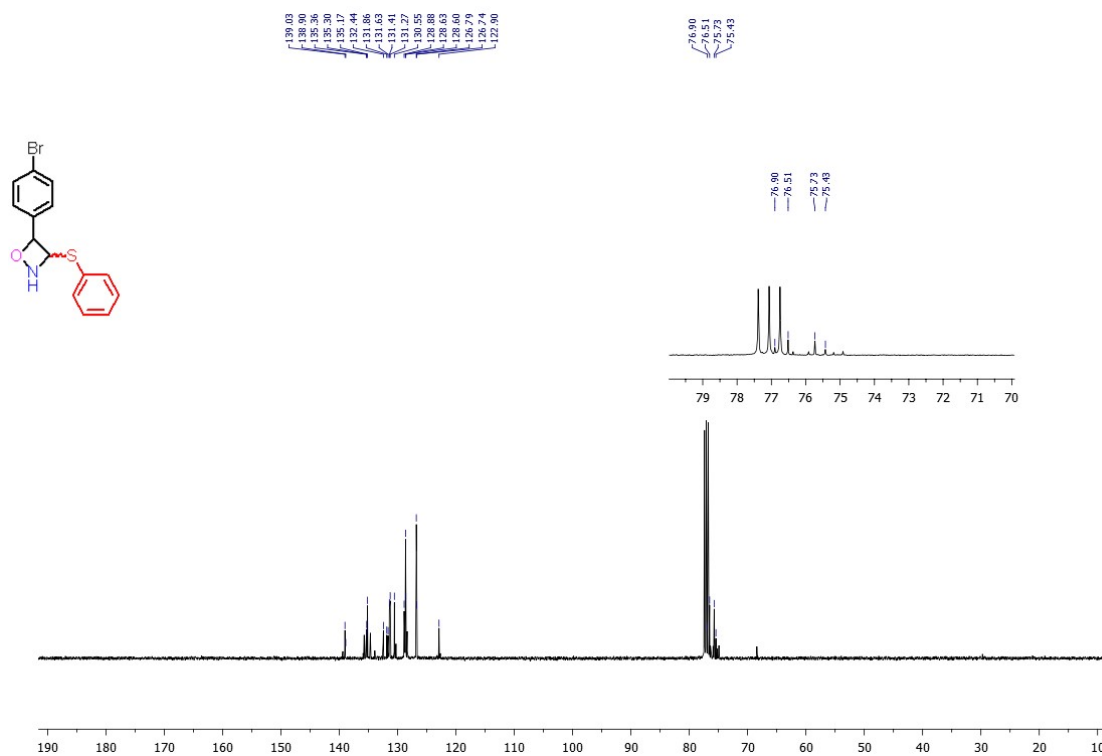

$^1\text{H}$ -NMR ( $\text{CDCl}_3$ , 400 MHz) Spectra of compound **13**

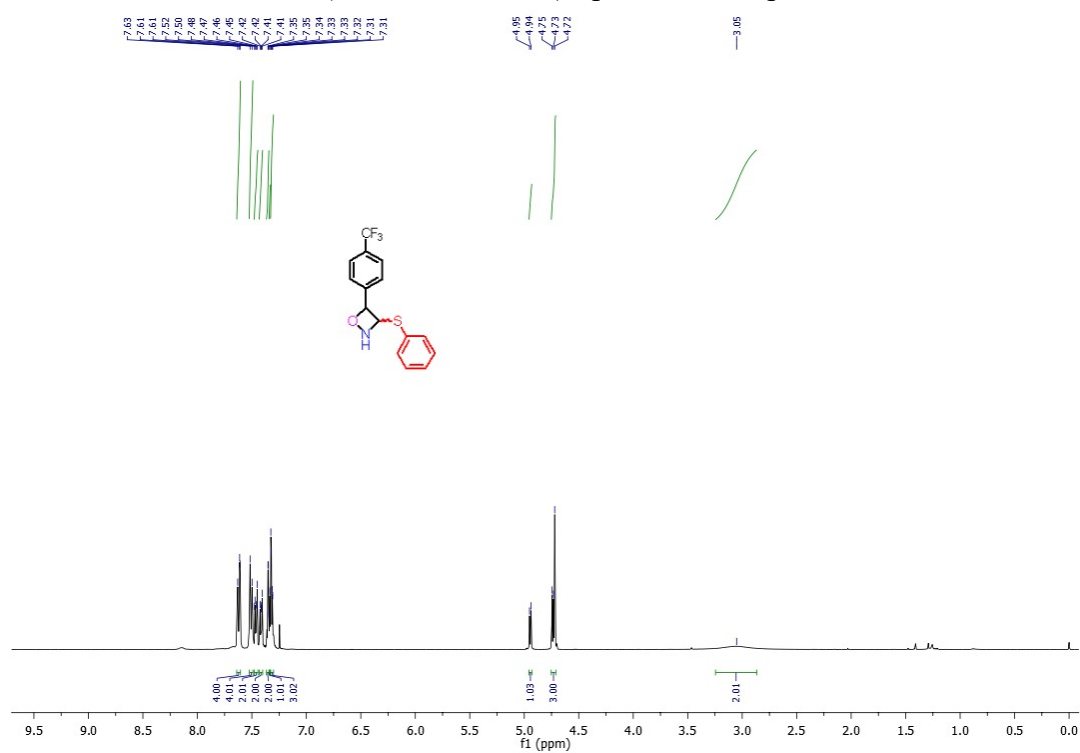

$^{13}\text{C}\{^1\text{H}\}$  NMR ( $\text{CDCl}_3$ , 125 MHz) spectra of compound **13**

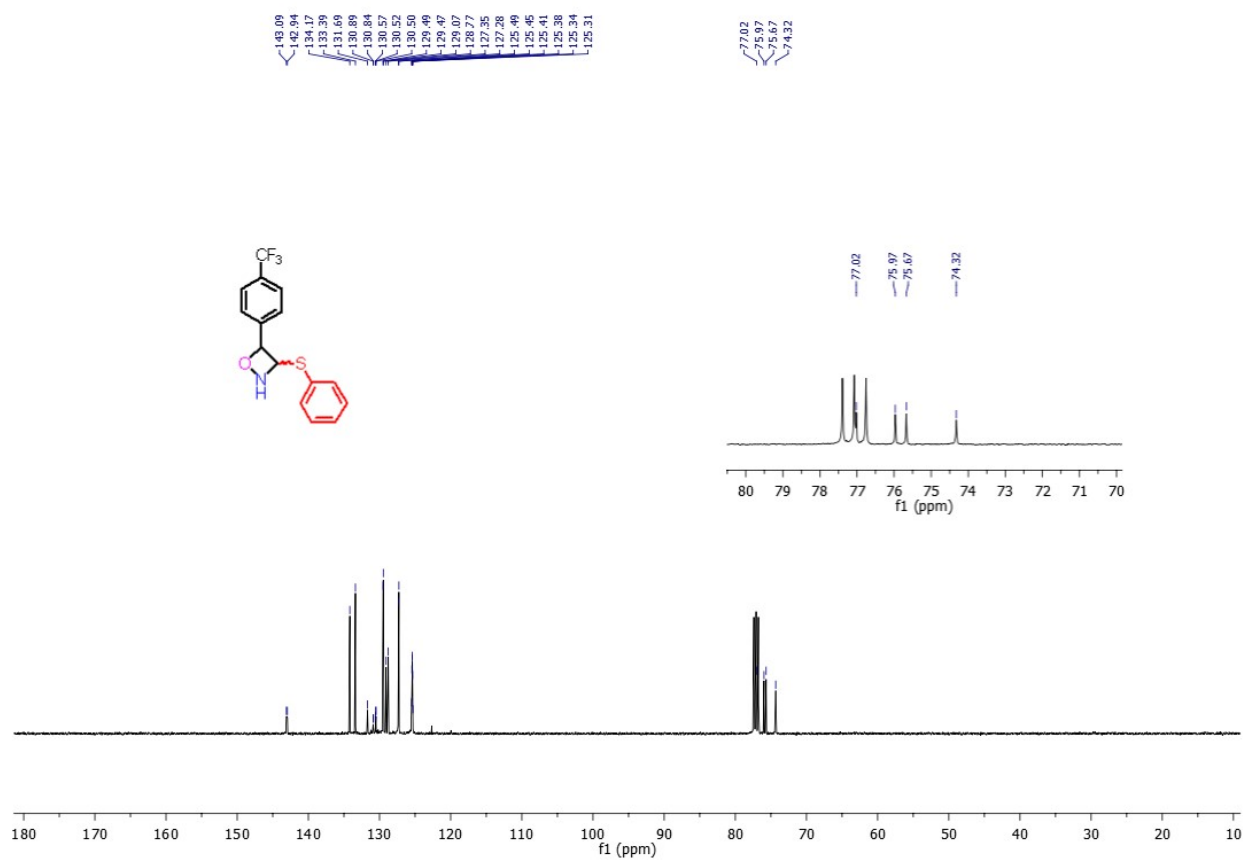

$^{19}\text{F}$ -NMR ( $\text{CDCl}_3$ , 377 MHz) Spectra of compound **13**

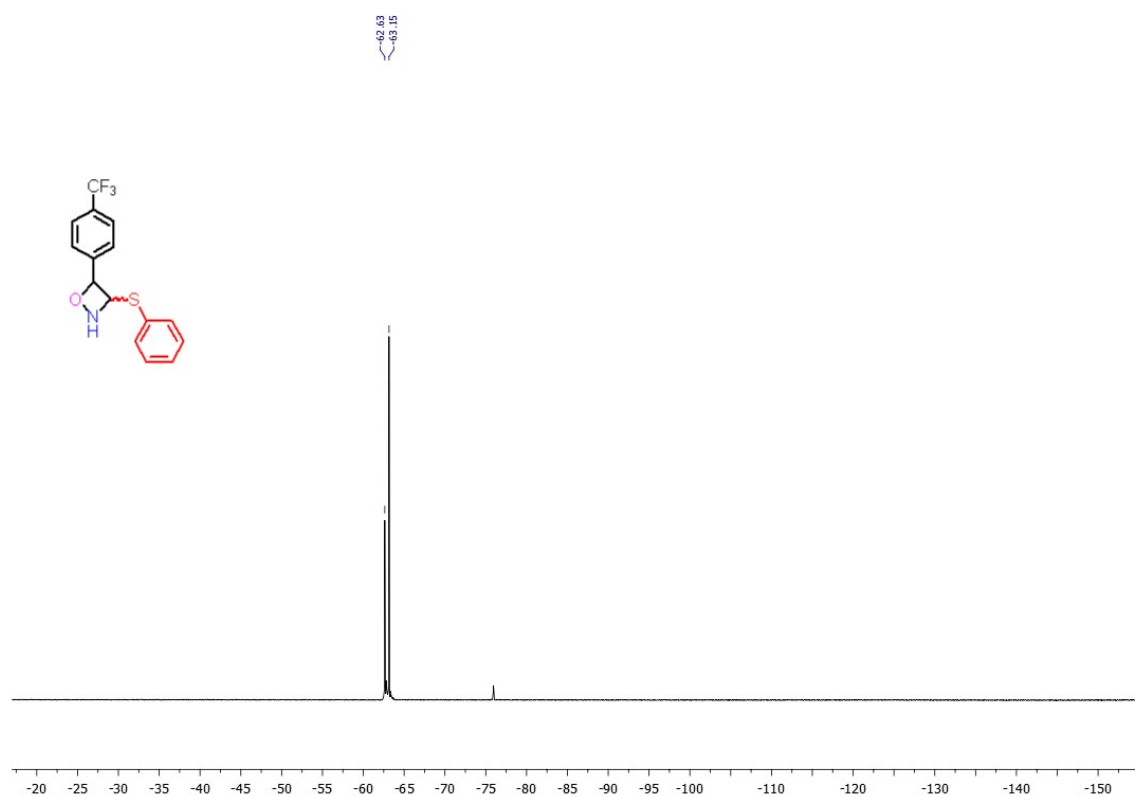

$^1\text{H}$ -NMR ( $\text{CDCl}_3$ , 400 MHz) Spectra of compound **14**

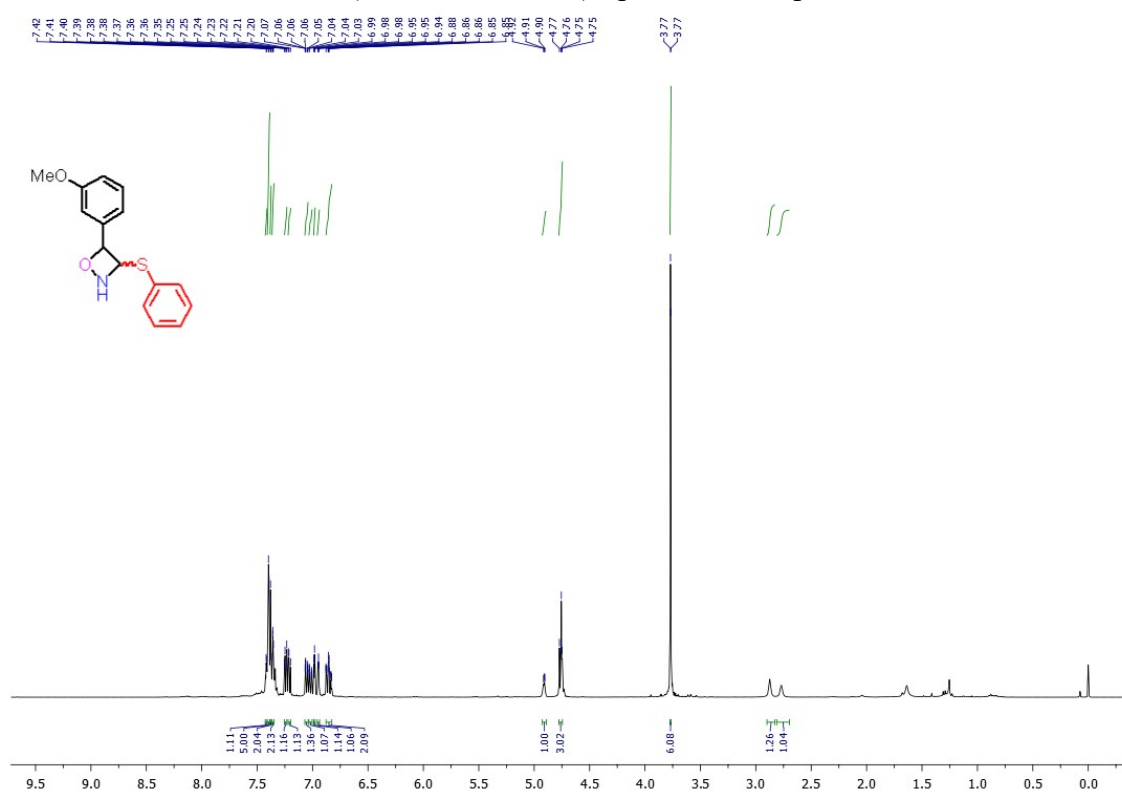

$^{13}\text{C}\{^1\text{H}\}$  NMR ( $\text{CDCl}_3$ , 100 MHz) spectra of compound **14**

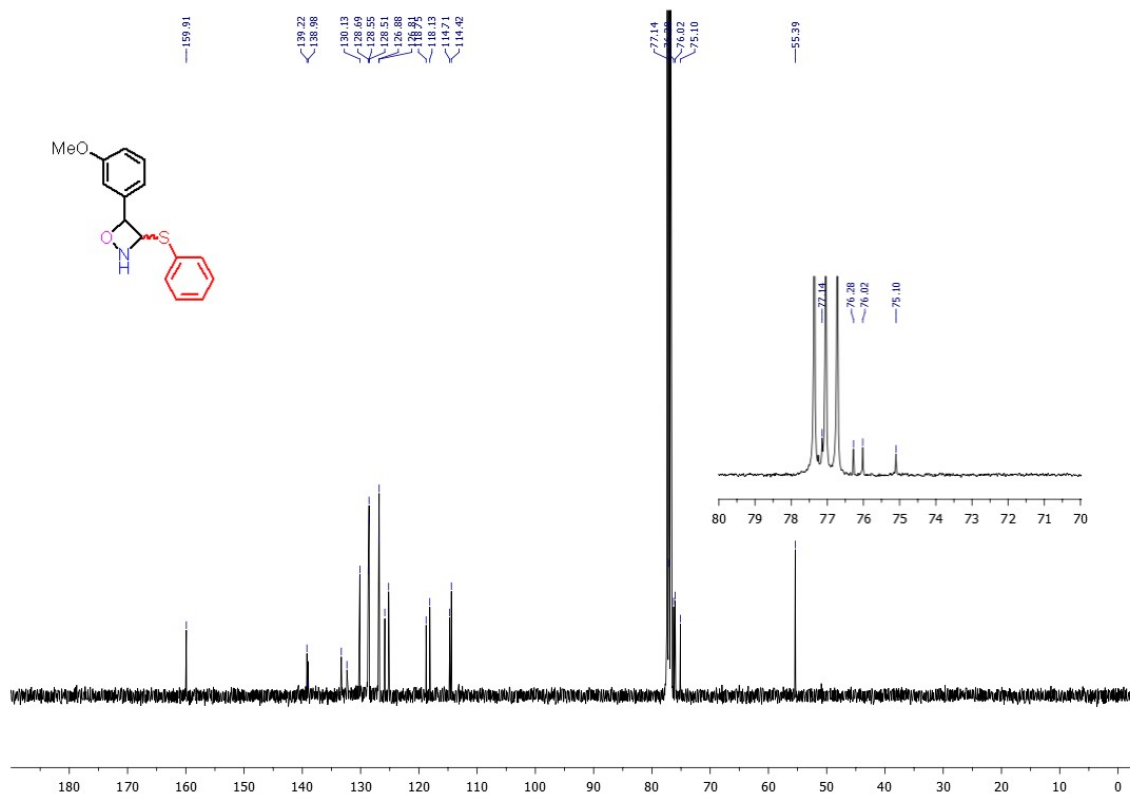

$^1\text{H}$ -NMR ( $\text{CDCl}_3$ , 400 MHz) Spectra of compound **15**

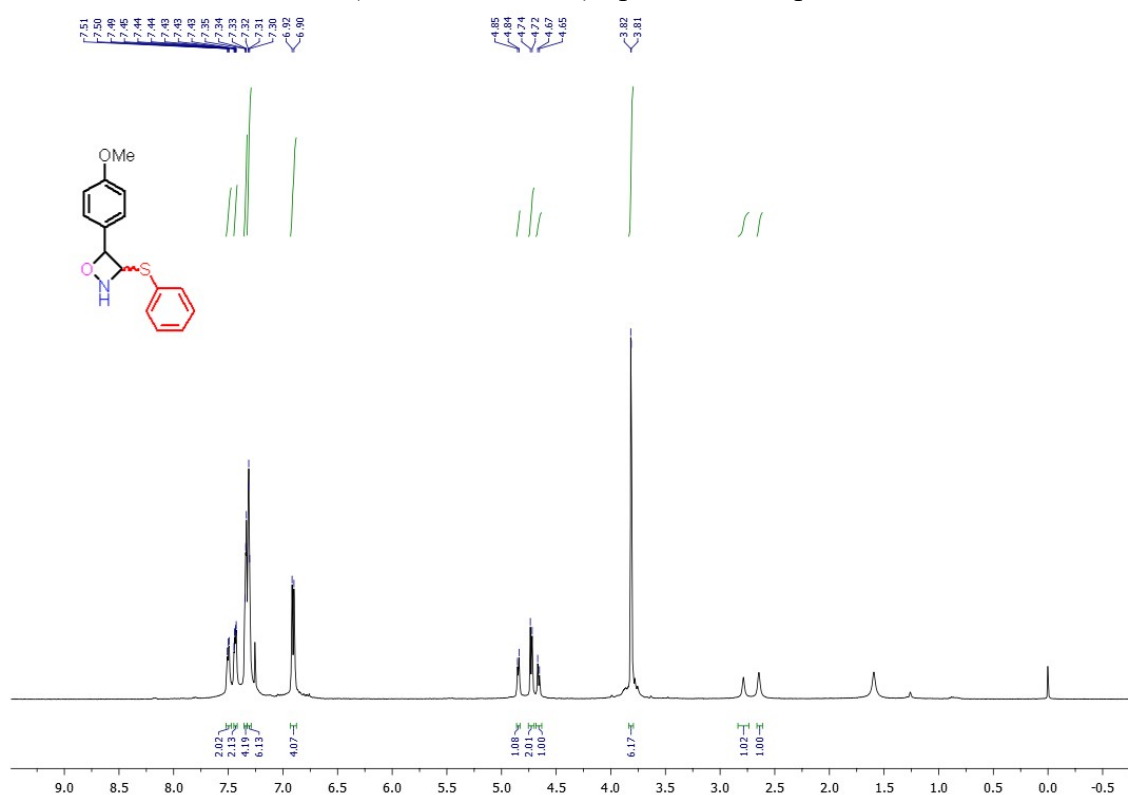

$^{13}\text{C}\{^1\text{H}\}$  NMR ( $\text{CDCl}_3$ , 100 MHz) spectra of compound **15**

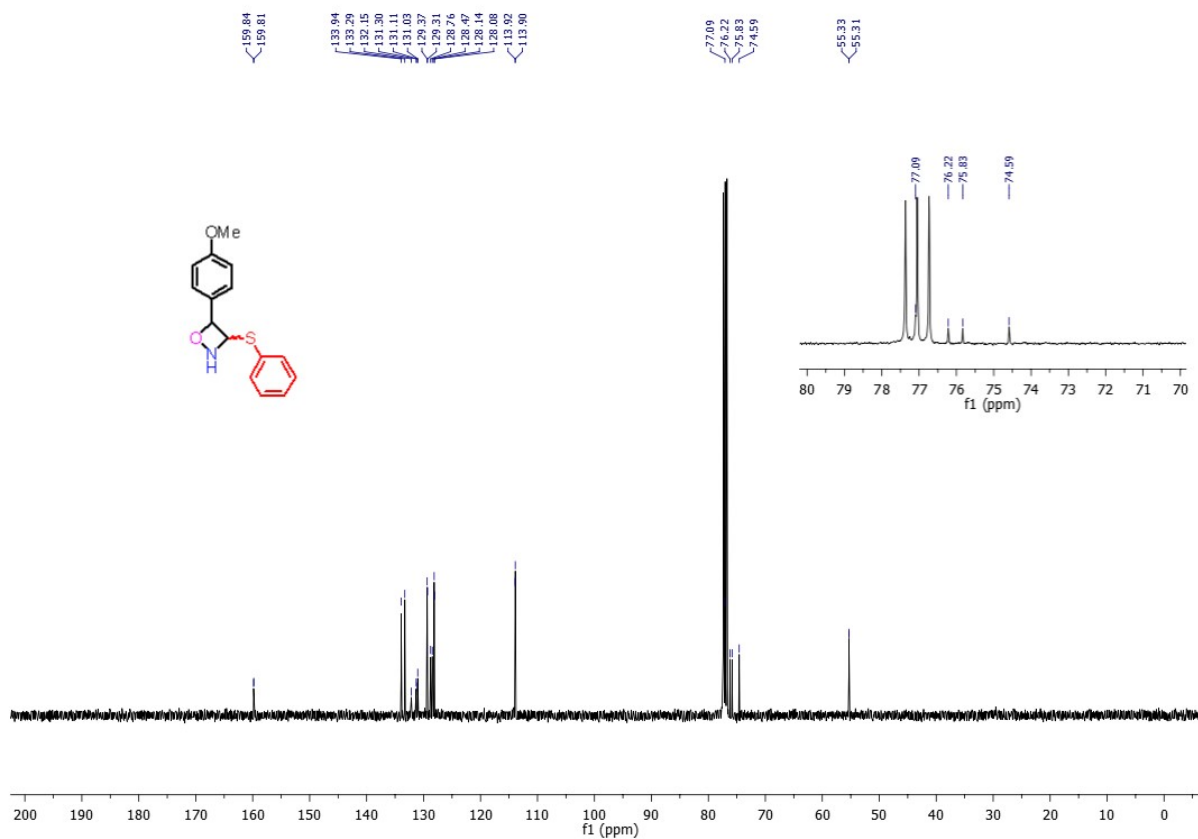

$^1\text{H}$ -NMR ( $\text{CDCl}_3$ , 400 MHz) Spectra of compound **16**

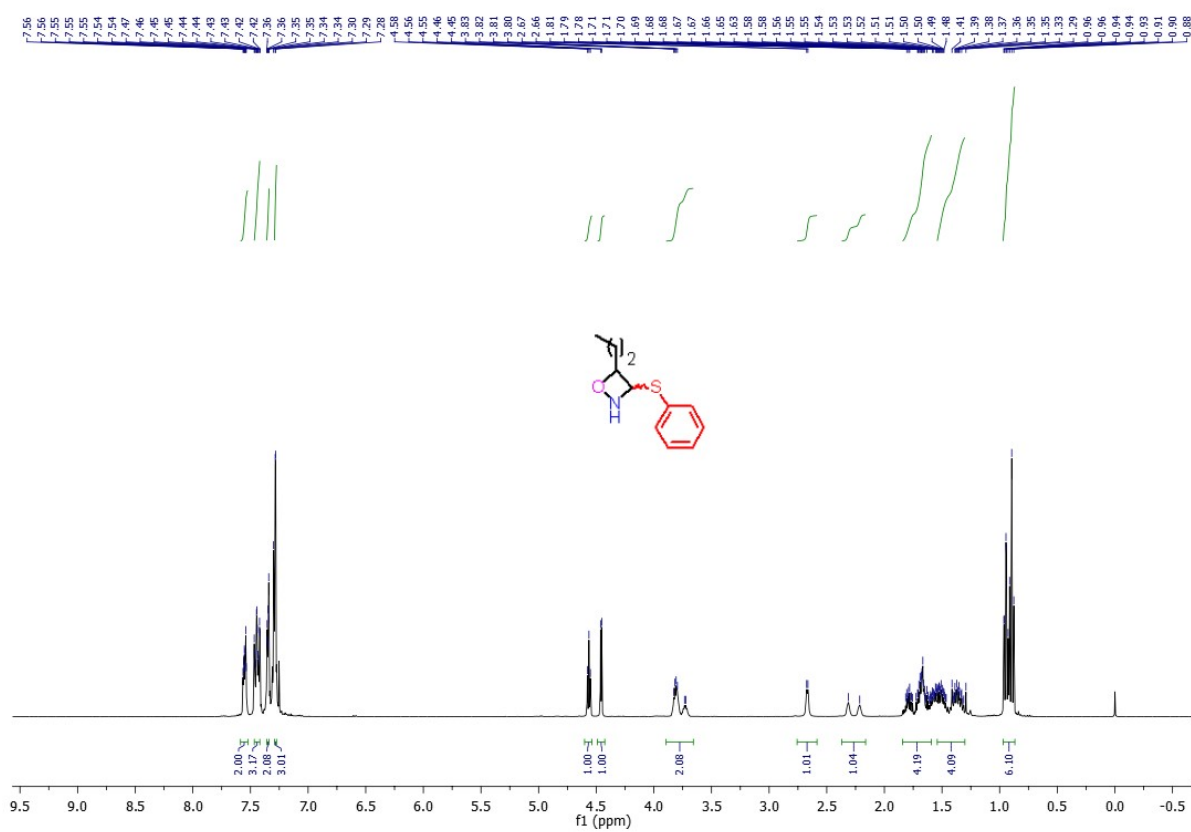

$^1\text{H}$ -NMR ( $\text{CDCl}_3$ , 400 MHz) Spectra of compound **17**

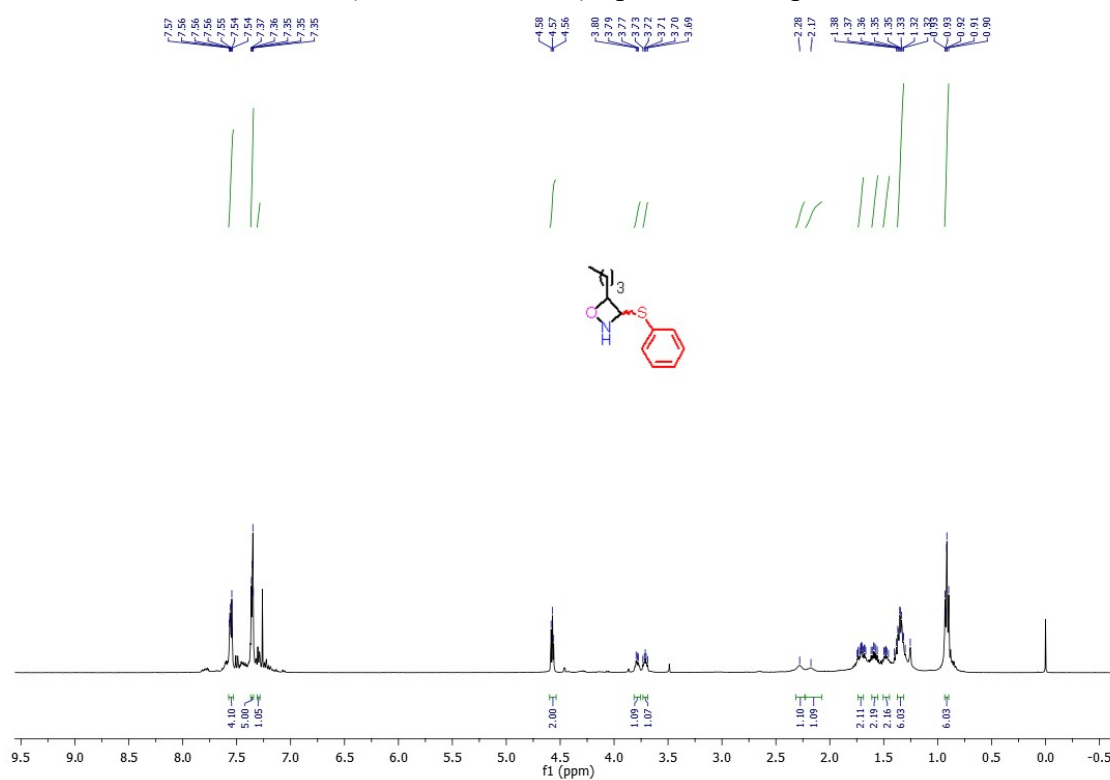

$^{13}\text{C}\{^1\text{H}\}$  NMR ( $\text{CDCl}_3$ , 100 MHz) spectra of compound **17**

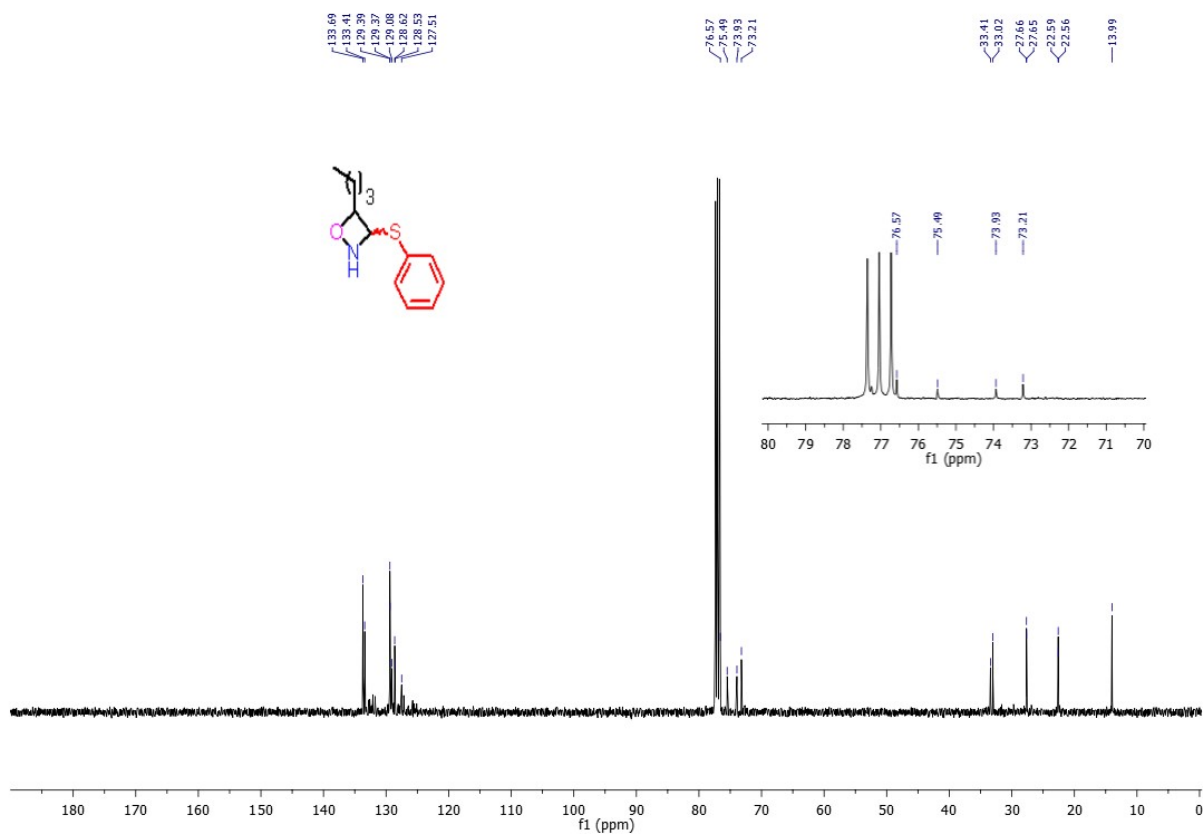

$^1\text{H}$ -NMR ( $\text{CDCl}_3$ , 400 MHz) Spectra of compound **18**

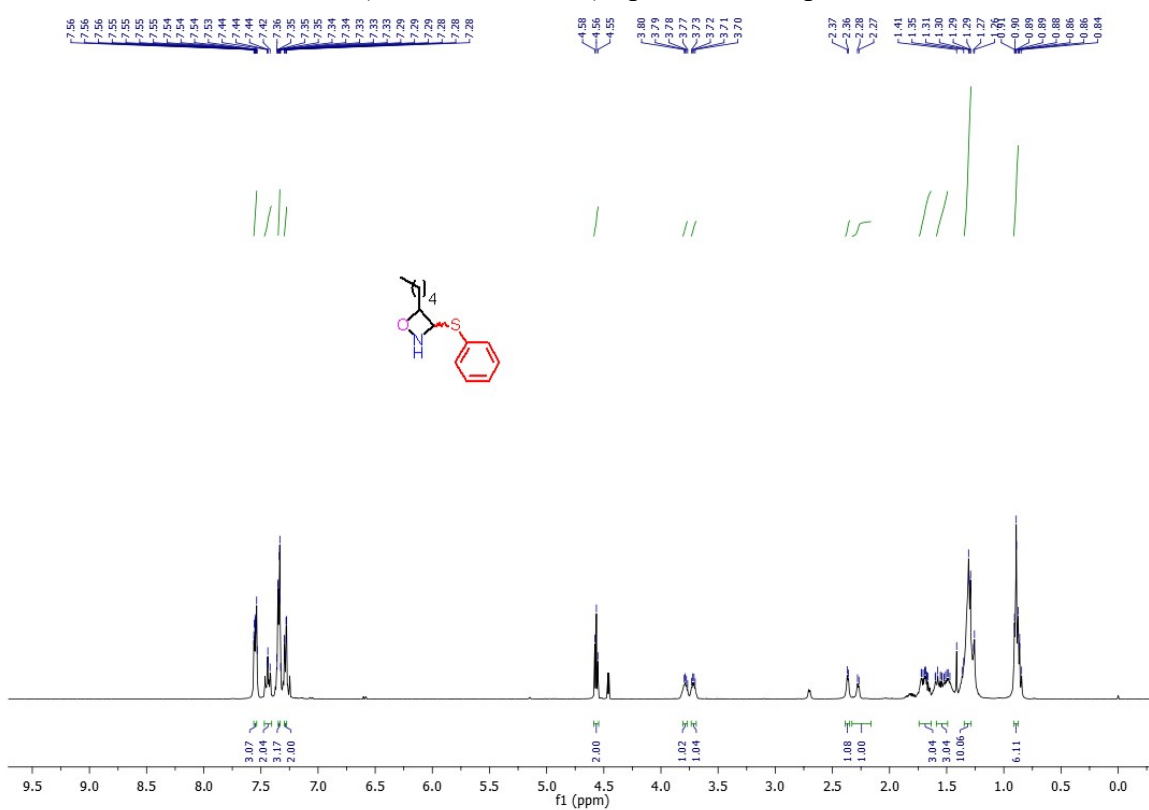

$^{13}\text{C}\{^1\text{H}\}$  NMR ( $\text{CDCl}_3$ , 100 MHz) spectra of compound **18**

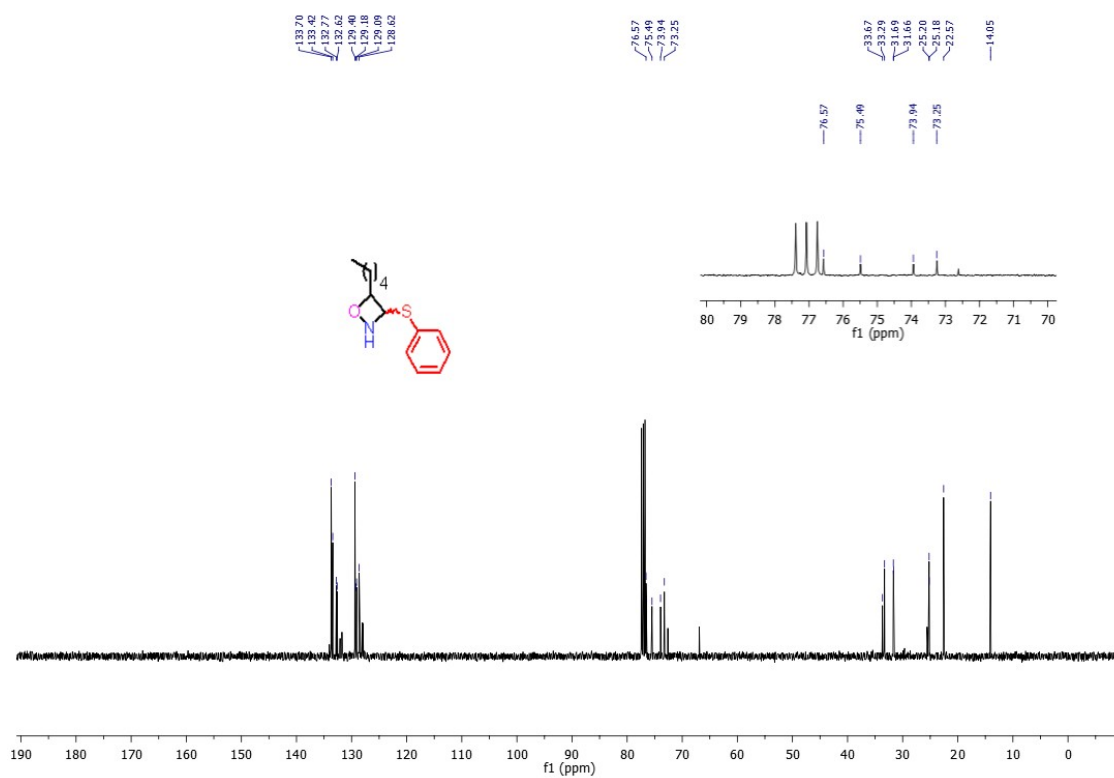

$^1\text{H}$ -NMR ( $\text{CDCl}_3$ , 400 MHz) Spectra of compound **19**

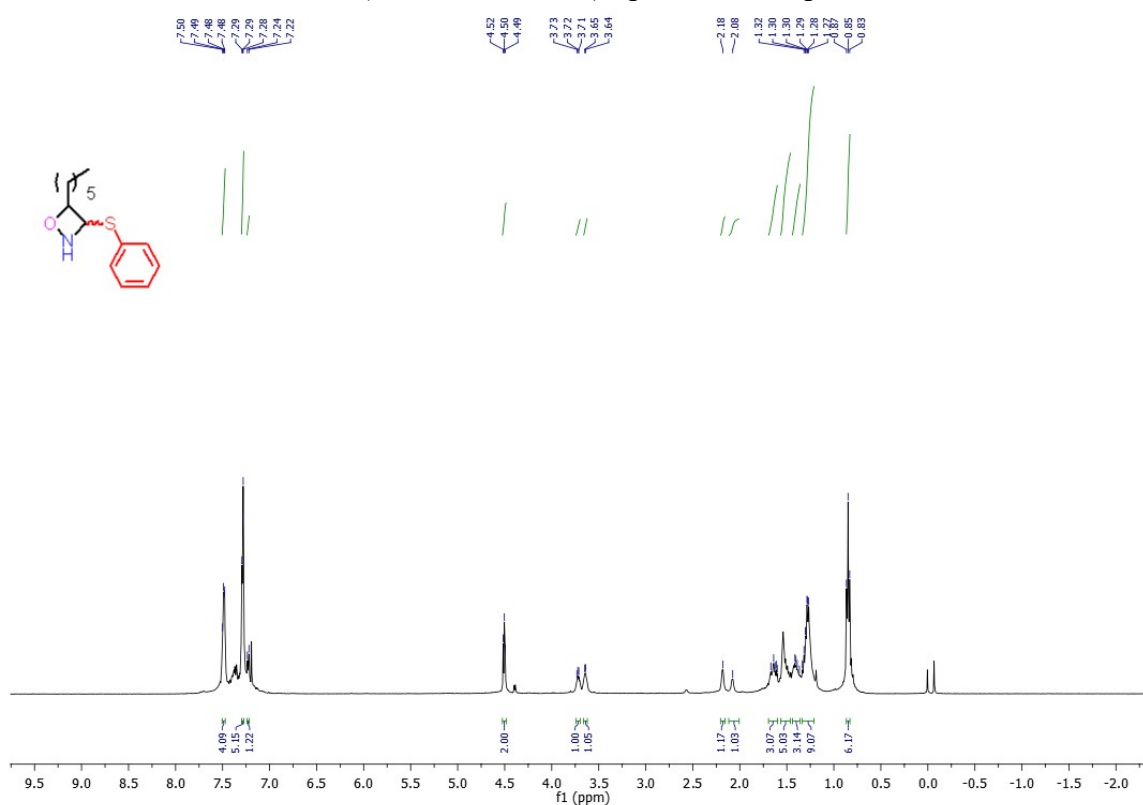

$^{13}\text{C}\{^1\text{H}\}$  NMR ( $\text{CDCl}_3$ , 125 MHz) spectra of compound **19**

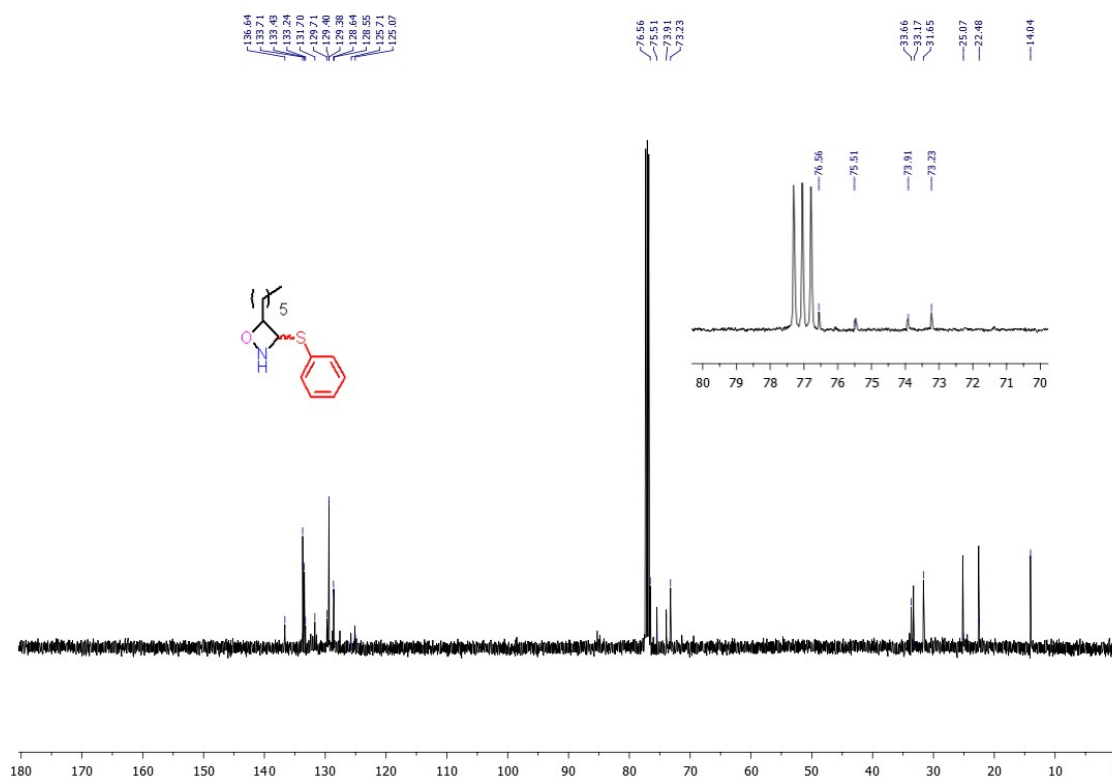

$^1\text{H}$ -NMR ( $\text{CDCl}_3$ , 400 MHz) Spectra of compound **20**

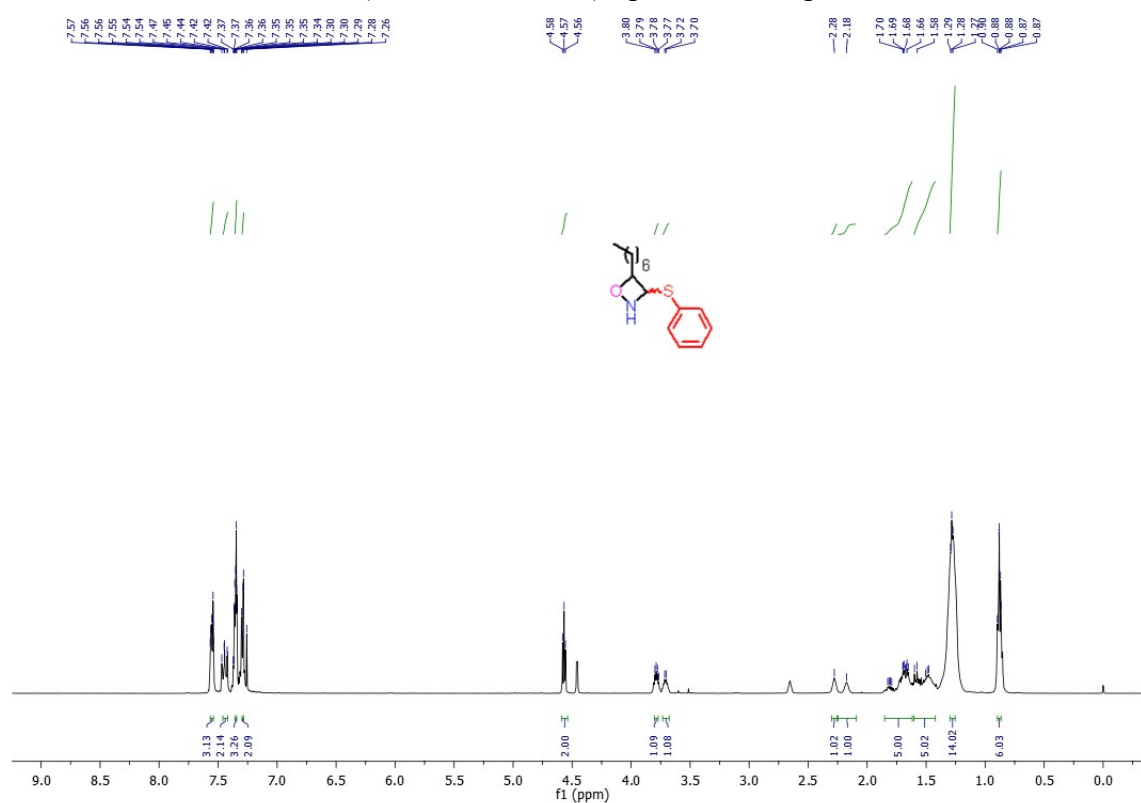

$^{13}\text{C}\{^1\text{H}\}$  NMR ( $\text{CDCl}_3$ , 100 MHz) spectra of compound **20**

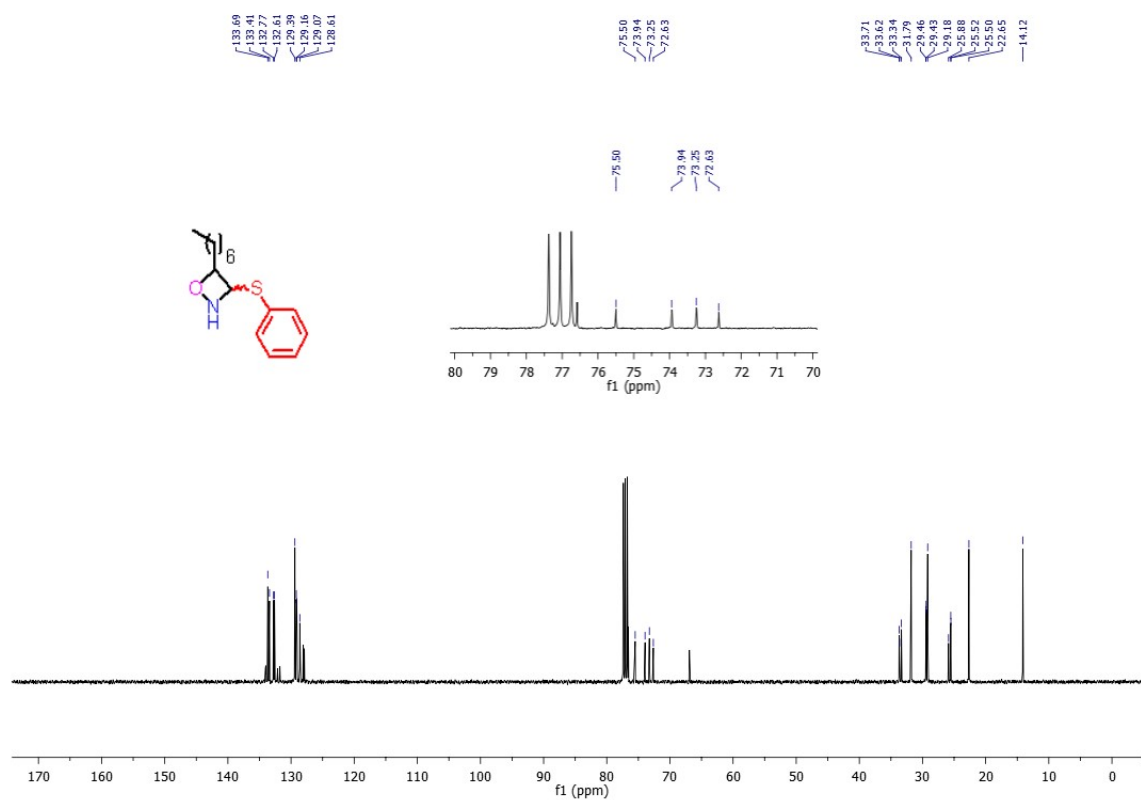

$^1\text{H}$ -NMR ( $\text{CDCl}_3$ , 400 MHz) Spectra of compound **21**

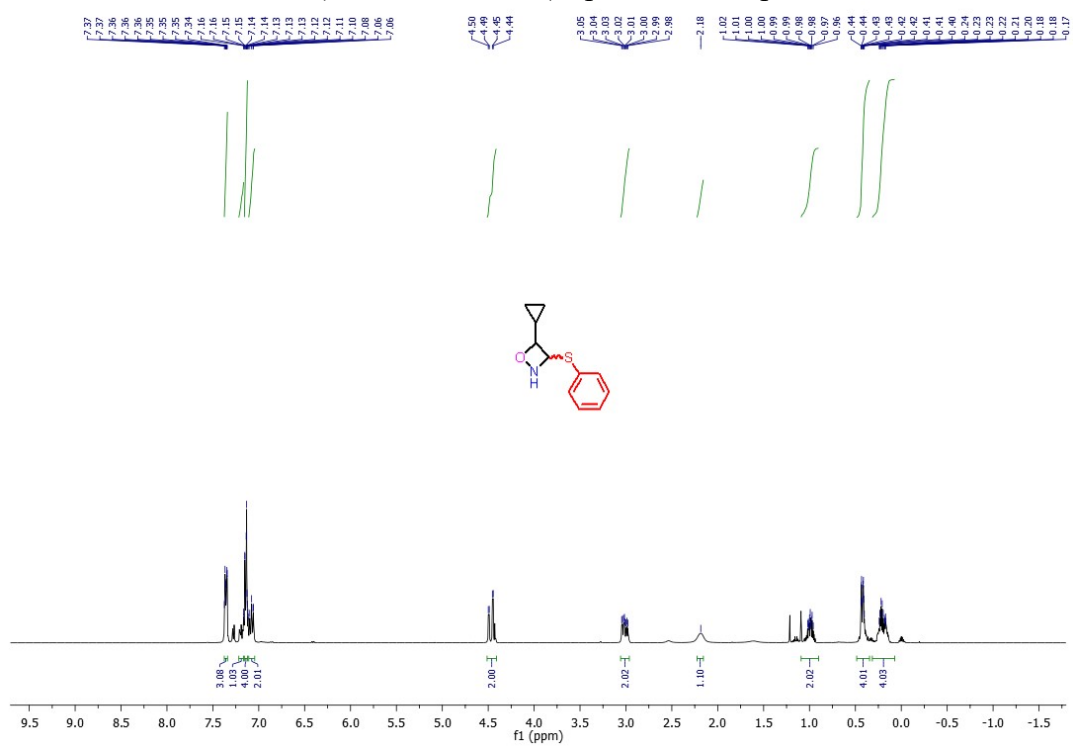

$^{13}\text{C}\{^1\text{H}\}$  NMR ( $\text{CDCl}_3$ , 100 MHz) spectra of compound **21**

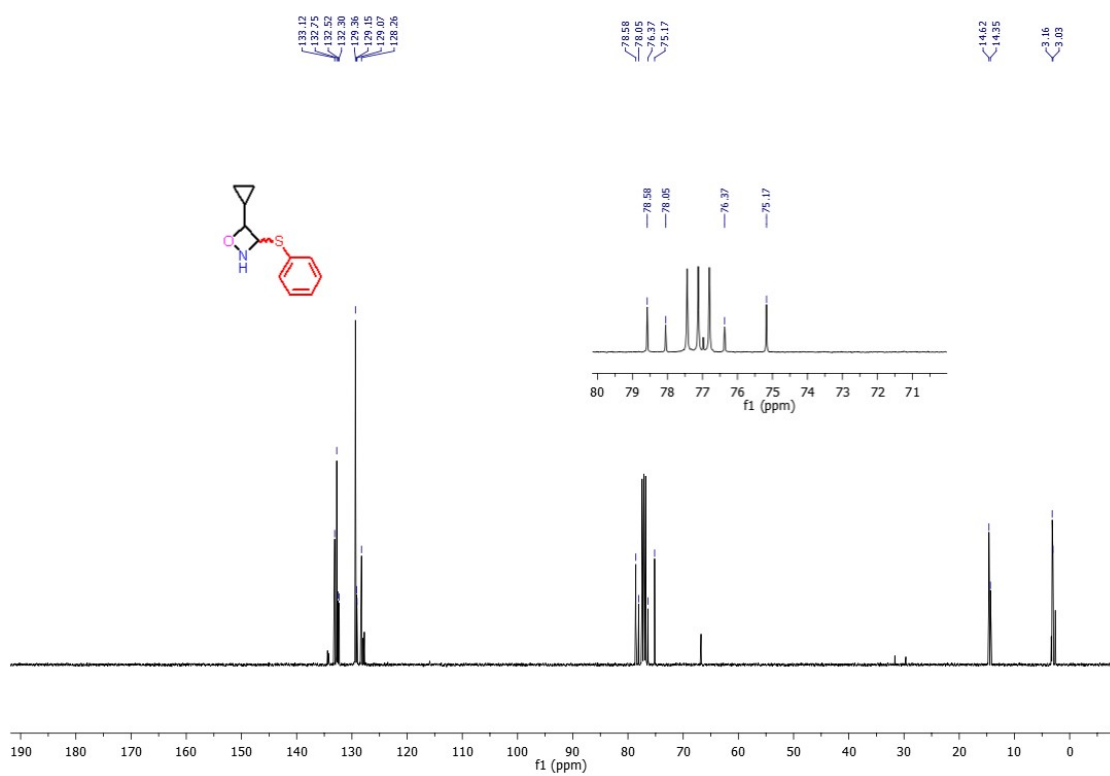

<sup>1</sup>H-NMR (CDCl<sub>3</sub>, 400 MHz) Spectra of compound **22**

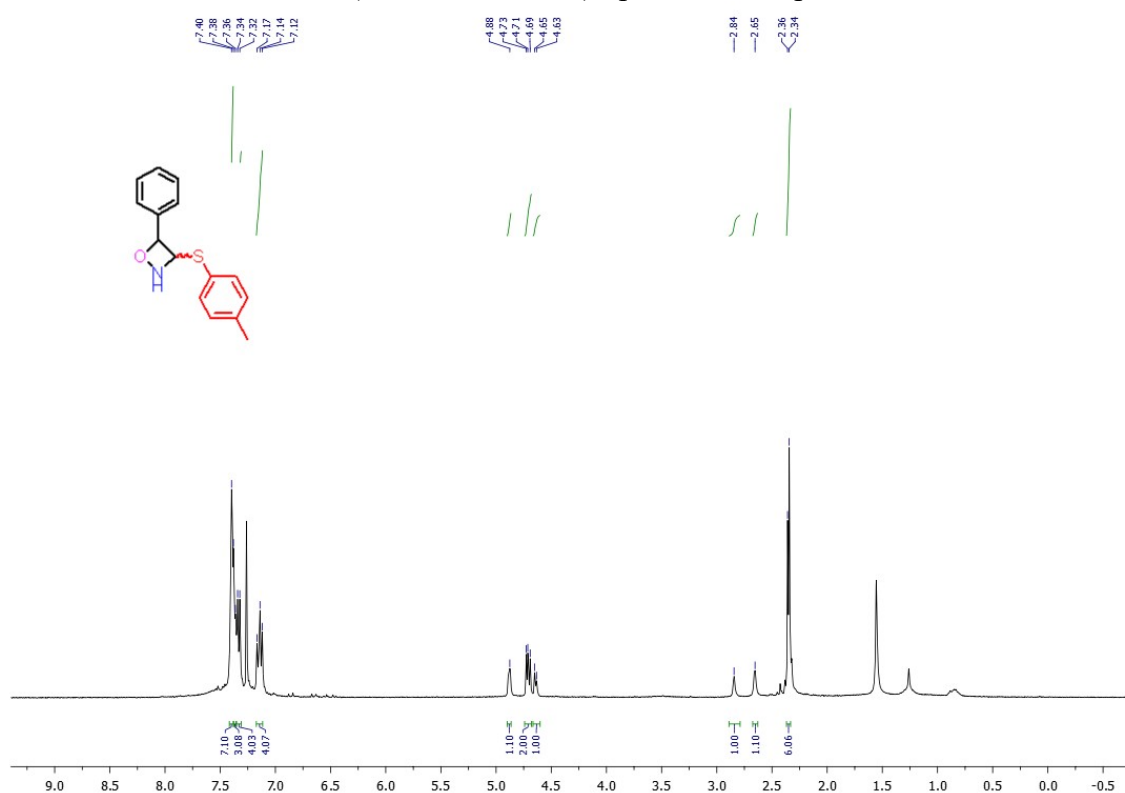

<sup>13</sup>C{<sup>1</sup>H} NMR (CDCl<sub>3</sub>, 125 MHz) spectra of compound **22**

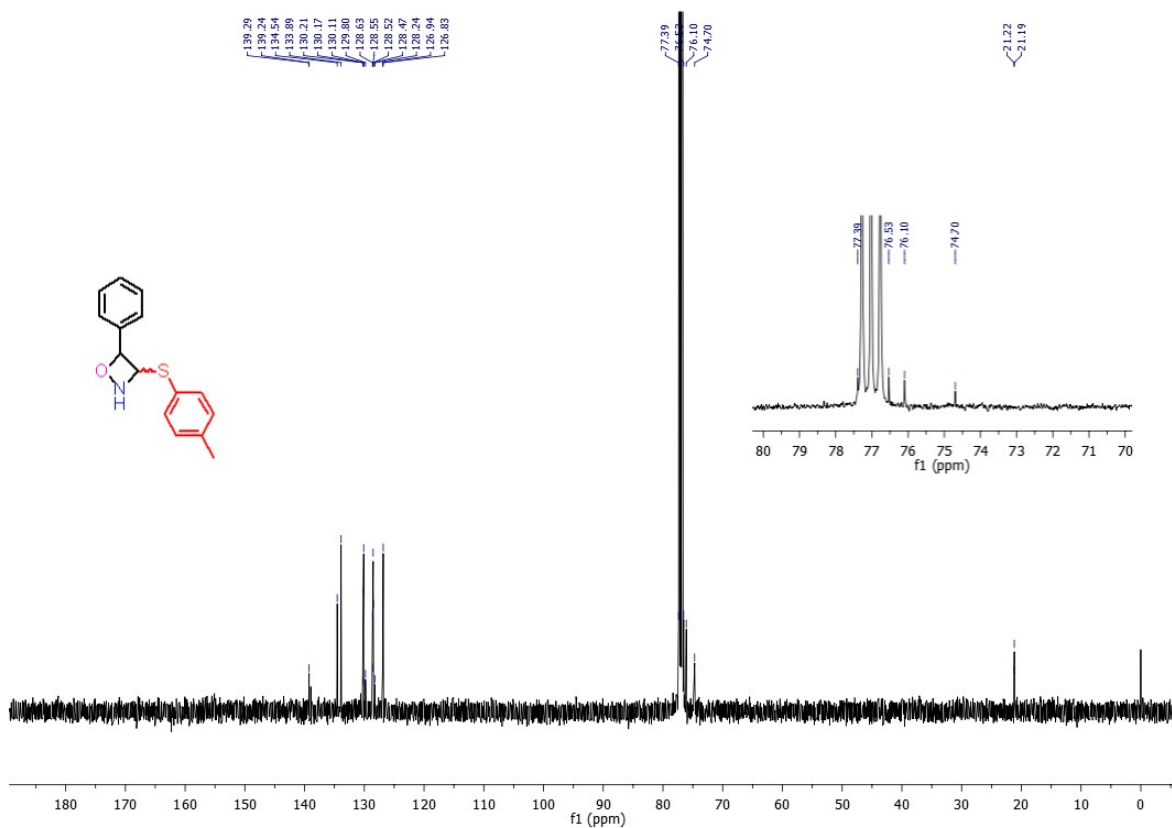

$^1\text{H}$ -NMR ( $\text{CDCl}_3$ , 400 MHz) Spectra of compound **23**

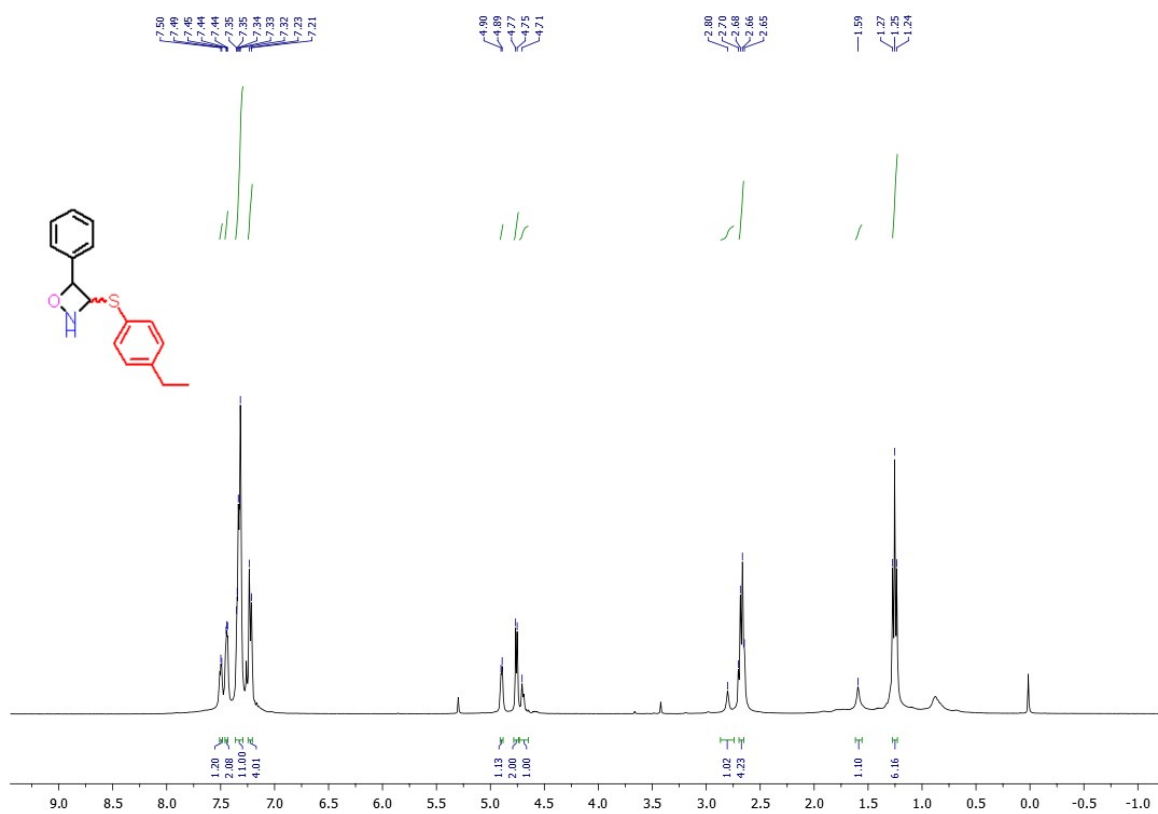

$^{13}\text{C}\{^1\text{H}\}$  NMR ( $\text{CDCl}_3$ , 100 MHz) spectra of compound **23**

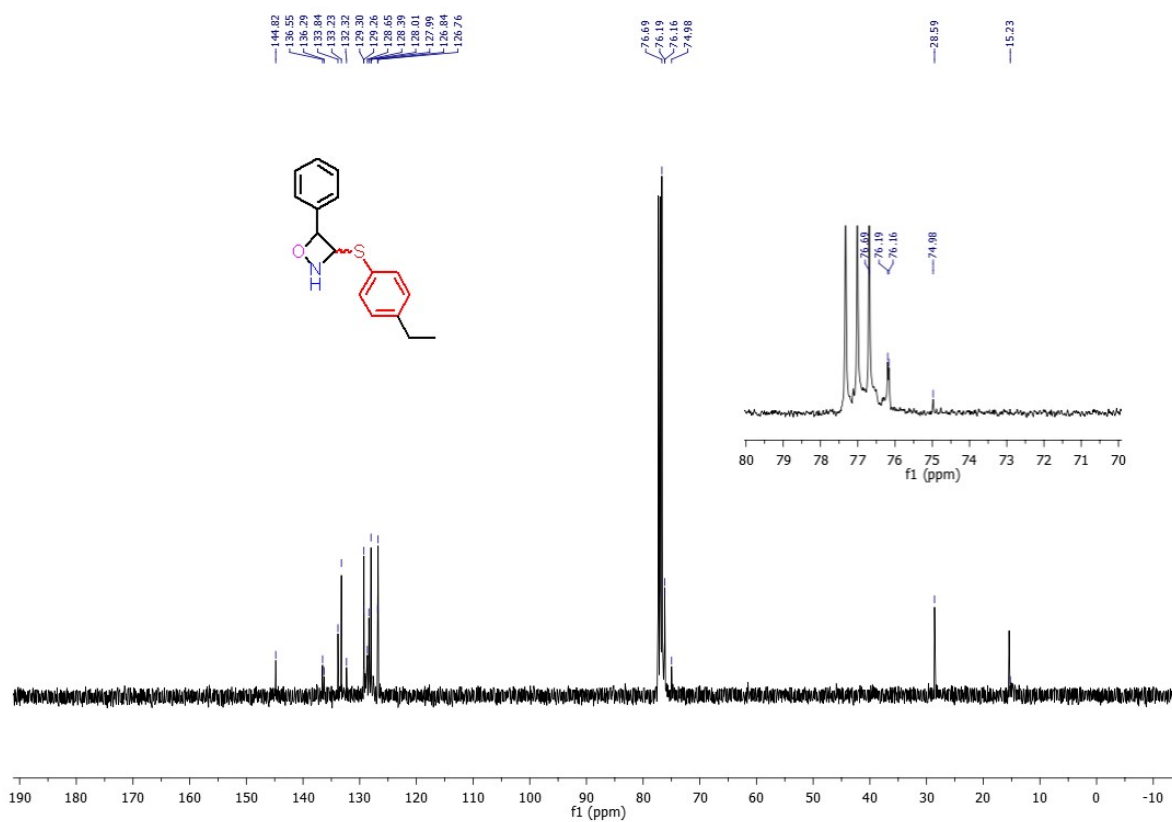

$^1\text{H}$ -NMR ( $\text{CDCl}_3$ , 400 MHz) Spectra of compound **24**

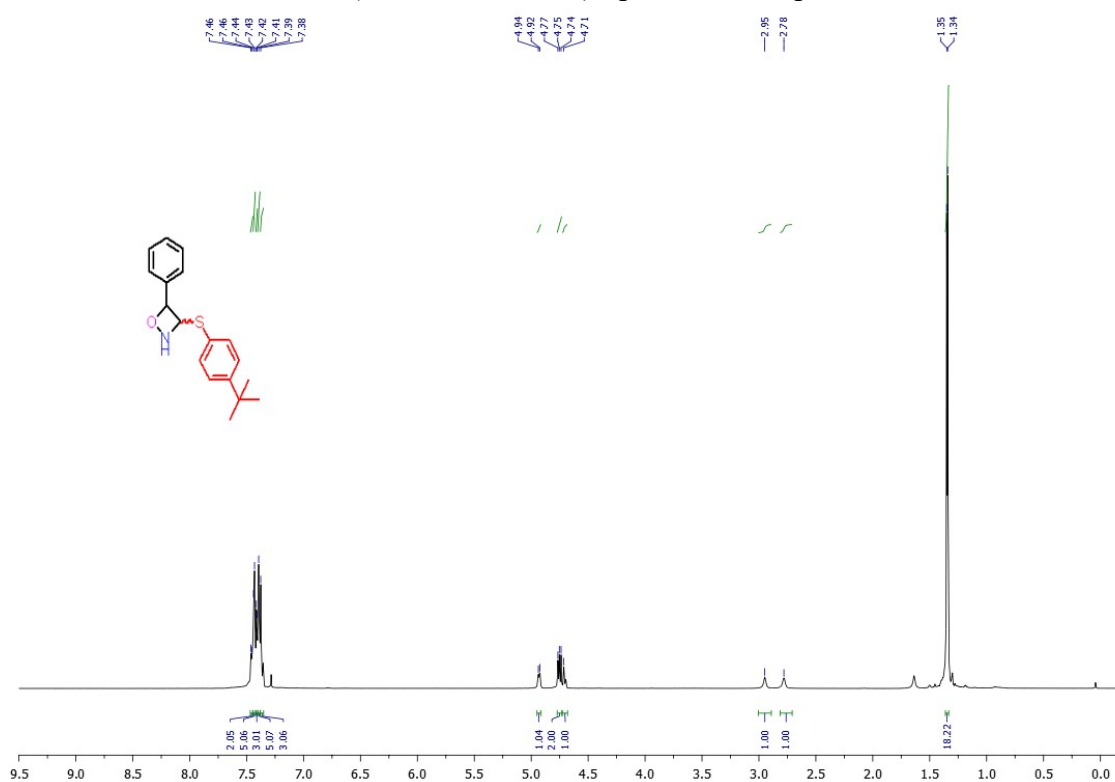

$^{13}\text{C}\{^1\text{H}\}$  NMR ( $\text{CDCl}_3$ , 100 MHz) spectra of compound **24**

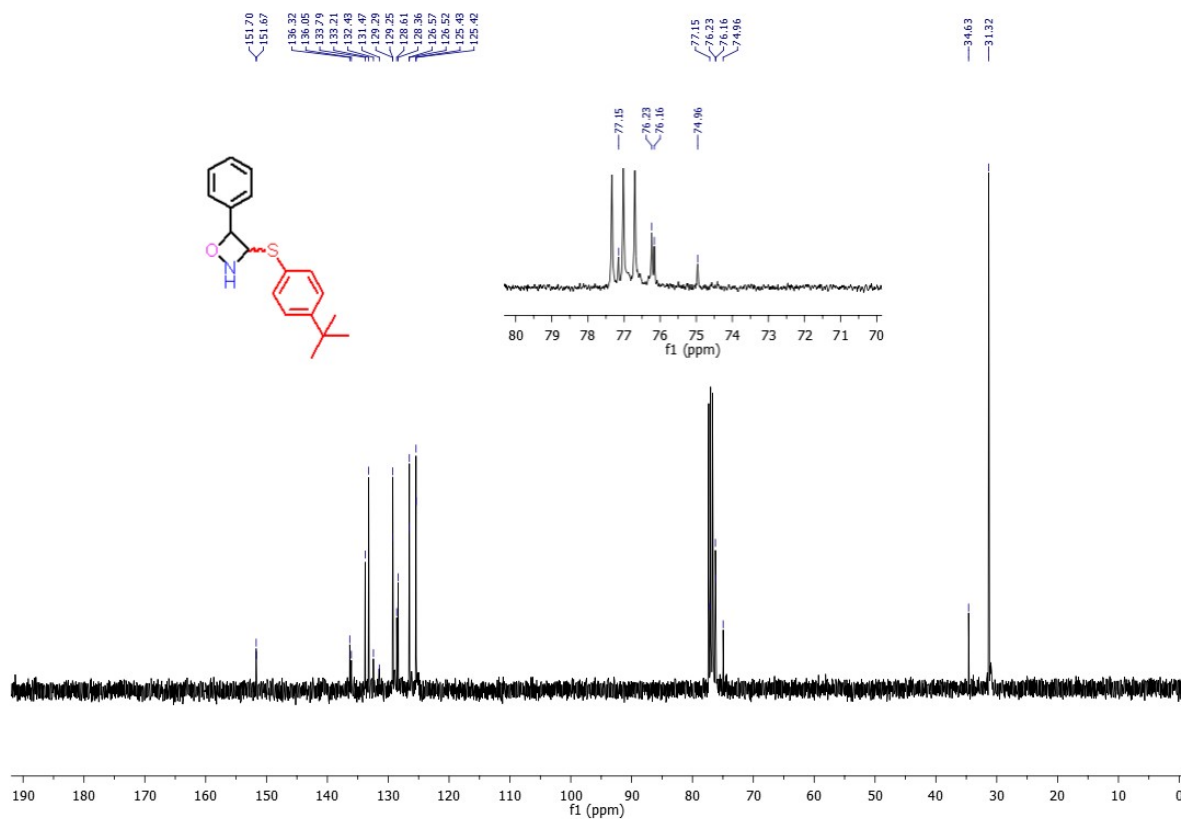

<sup>1</sup>H-NMR (CDCl<sub>3</sub>, 400 MHz) Spectra of compound **25**

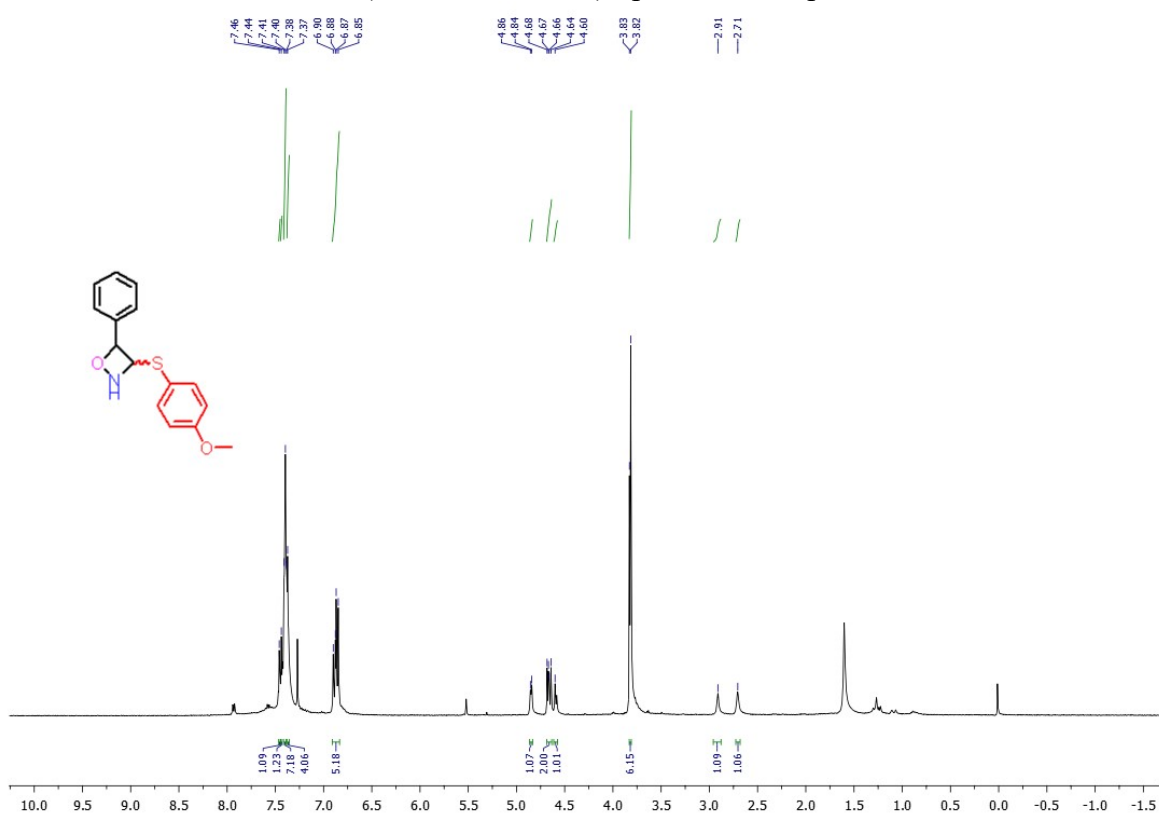

<sup>13</sup>C{<sup>1</sup>H} NMR (CDCl<sub>3</sub>, 100 MHz) spectra of compound **25**

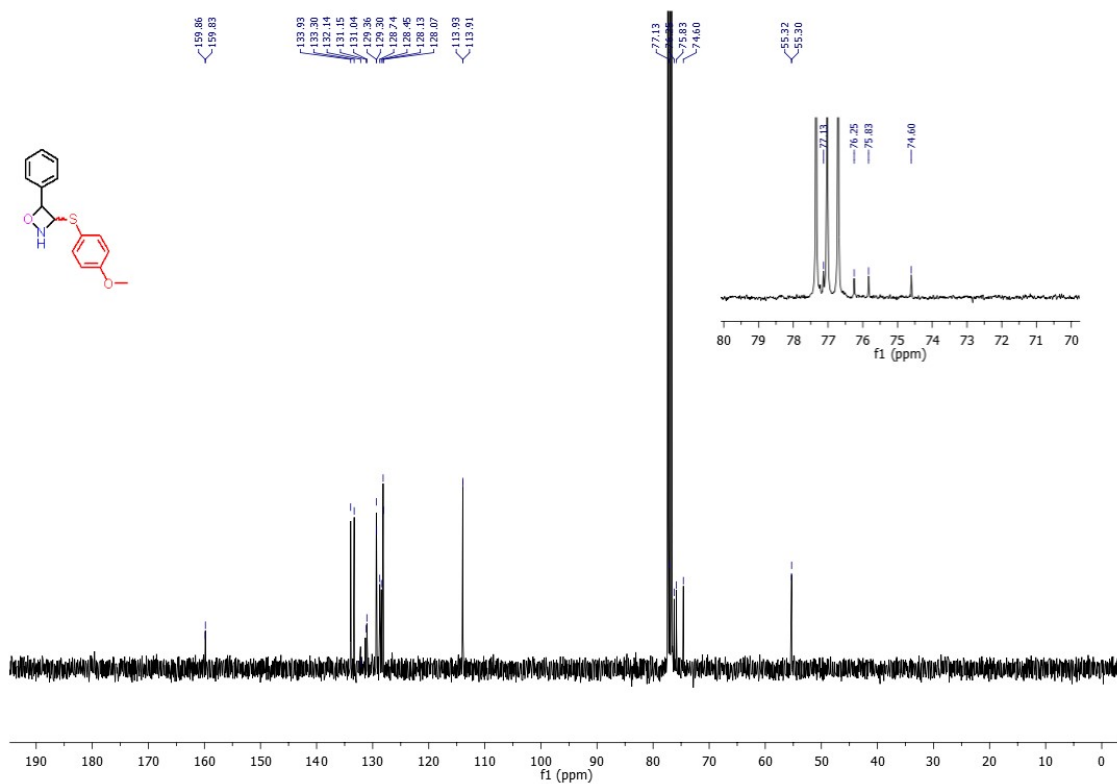

$^1\text{H}$ -NMR ( $\text{CDCl}_3$ , 400 MHz) Spectra of compound **26**

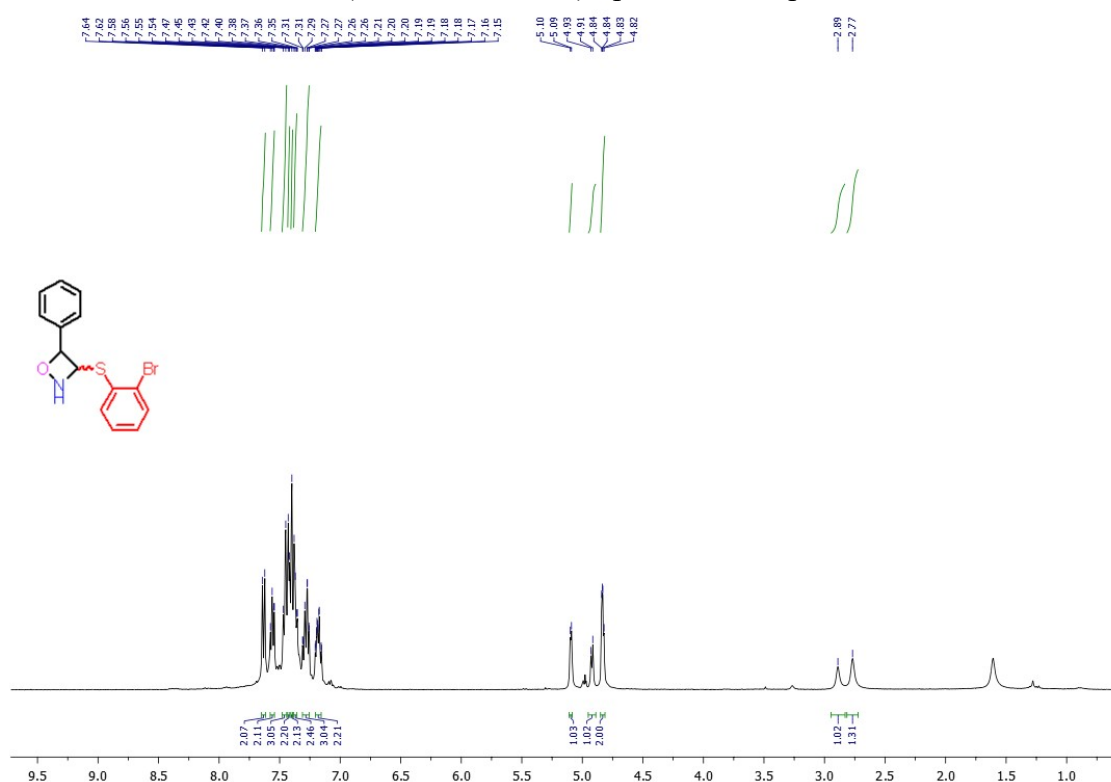

$^{13}\text{C}\{^1\text{H}\}$  NMR ( $\text{CDCl}_3$ , 100 MHz) spectra of compound **26**

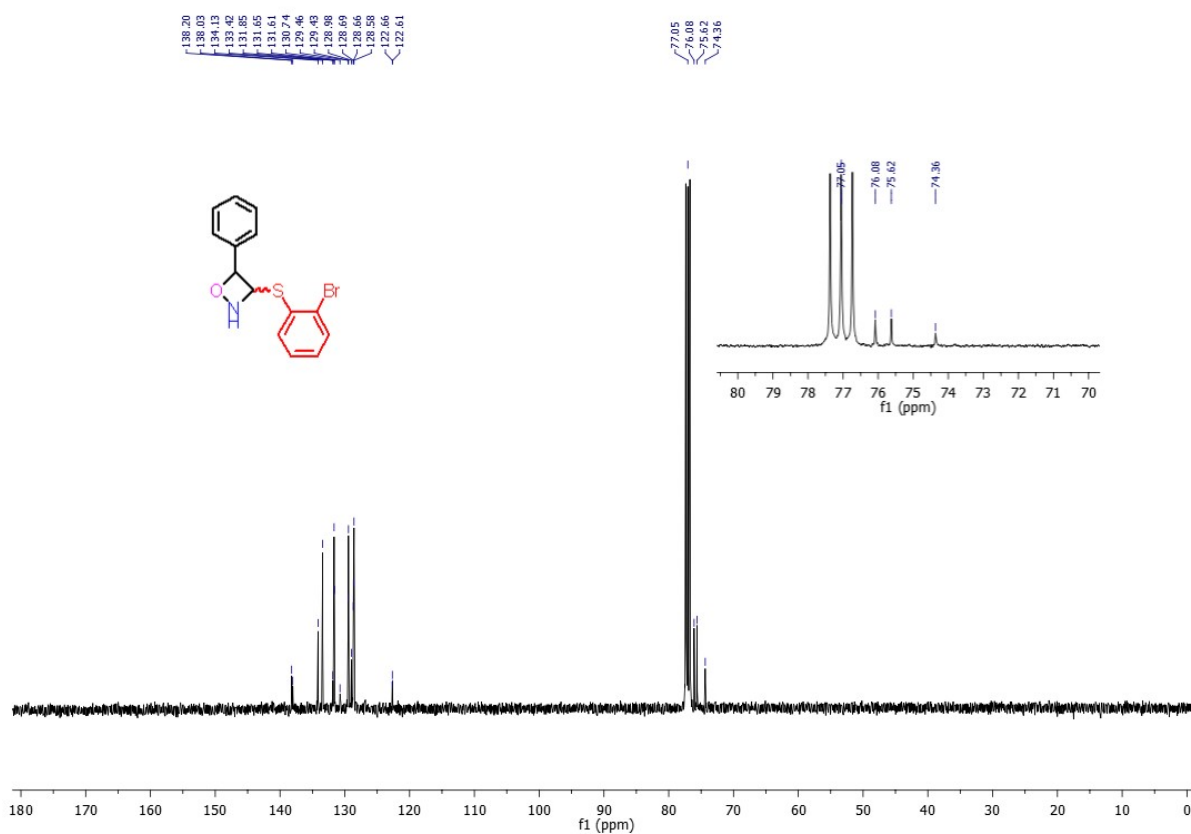

$^1\text{H}$ -NMR ( $\text{CDCl}_3$ , 400 MHz) Spectra of compound **27**

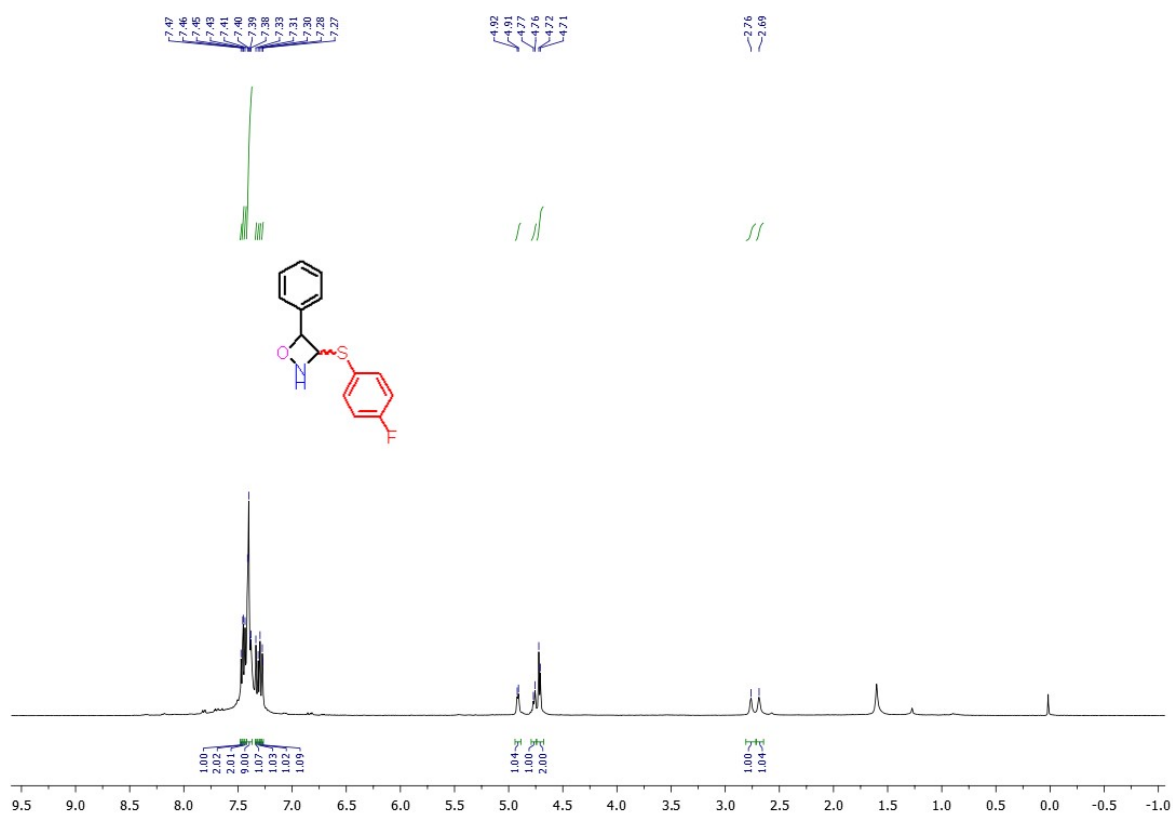

$^{13}\text{C}\{^1\text{H}\}$  NMR ( $\text{CDCl}_3$ , 100 MHz) spectra of compound **27**

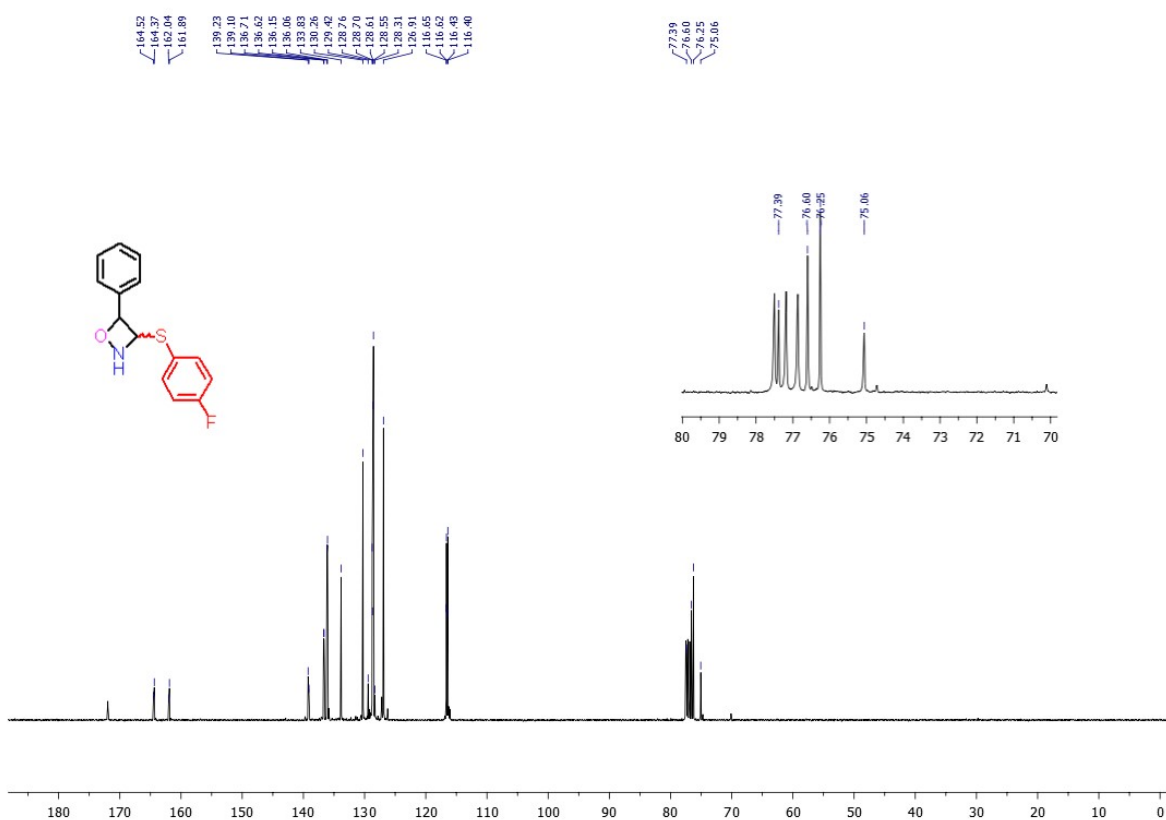

$^{19}\text{F}$ -NMR ( $\text{CDCl}_3$ , 377 MHz) spectra of compound **27**

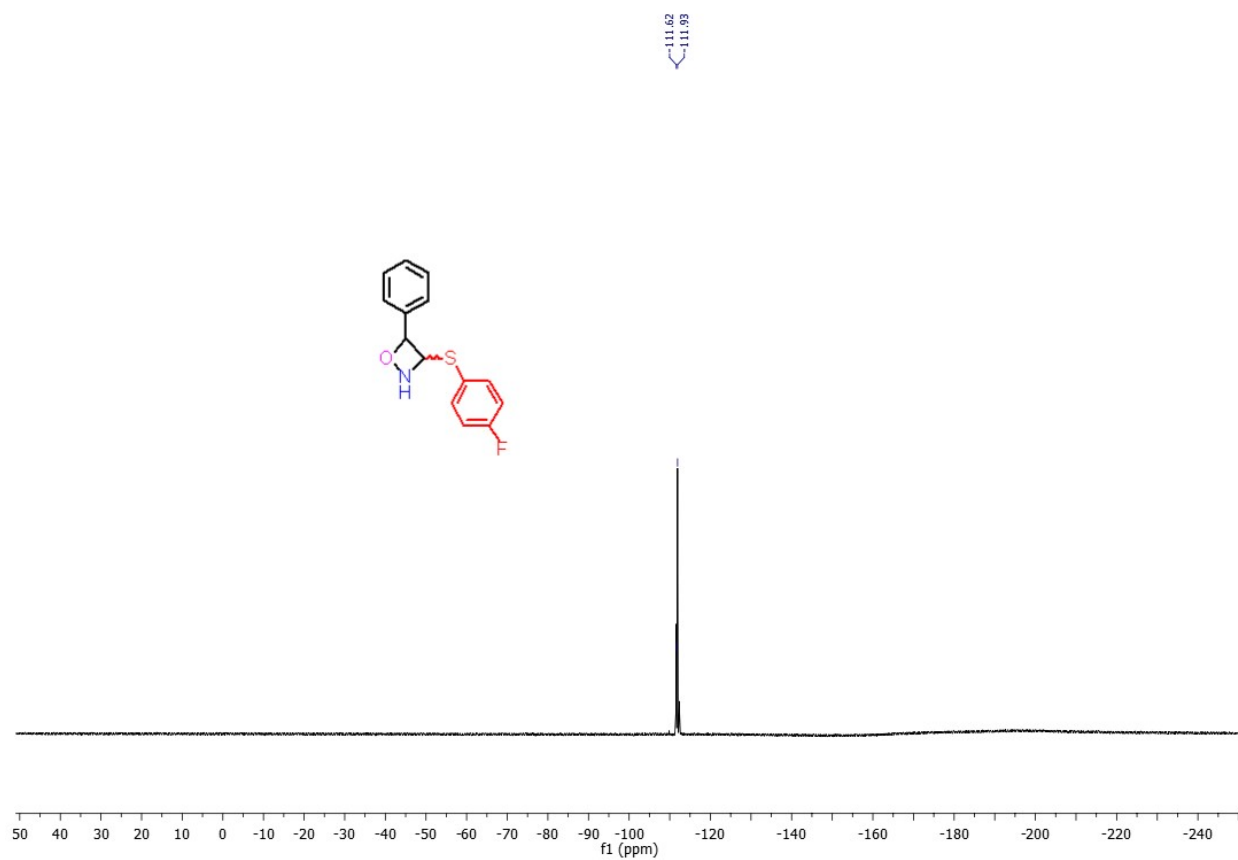

COC1(COC1Sc2ccccc2F)C3=CC=CC=C3I

Chemical structure: (S)-1-(2-fluorophenyl)-2-(4-iodophenyl)-1,3-dioxolane

<sup>1</sup>H NMR spectrum (CDCl<sub>3</sub>) showing peaks from 0.5 to 9.5 ppm. The spectrum includes aromatic signals (7.0-7.6 ppm), a methine proton (5.1 ppm), and a methylene group (3.0 ppm). Integration values are provided below the baseline.

| Chemical Shift (ppm) | Integration |
|----------------------|-------------|
| 7.52                 | 2.18        |
| 7.46                 | 2.02        |
| 7.37                 | 2.01        |
| 7.36                 | 8.04        |
| 7.35                 | 2.10        |
| 7.25                 | 2.01        |
| 5.17                 | 1.01        |
| 5.16                 | 1.00        |
| 4.91                 | 2.04        |
| 4.89                 |             |
| 3.01                 | 2.01        |

Chemical structure: c1ccccc1[C@H]2CN[C@@H](c3ccccc3S2)c4ccccc4

<sup>13</sup>C NMR spectrum (ppm):

- 161.24
- 160.98
- 158.54
- 133.65
- 130.55
- 130.11
- 130.05
- 130.02
- 129.41
- 129.40
- 128.64
- 128.52
- 128.32
- 124.48
- 122.85
- 122.85
- 115.47
- 115.33
- 115.26
- 76.11
- 74.77
- 70.86
- 70.87

$^{19}\text{F}$ -NMR ( $\text{CDCl}_3$ , 377 MHz) Spectra of compound **28**

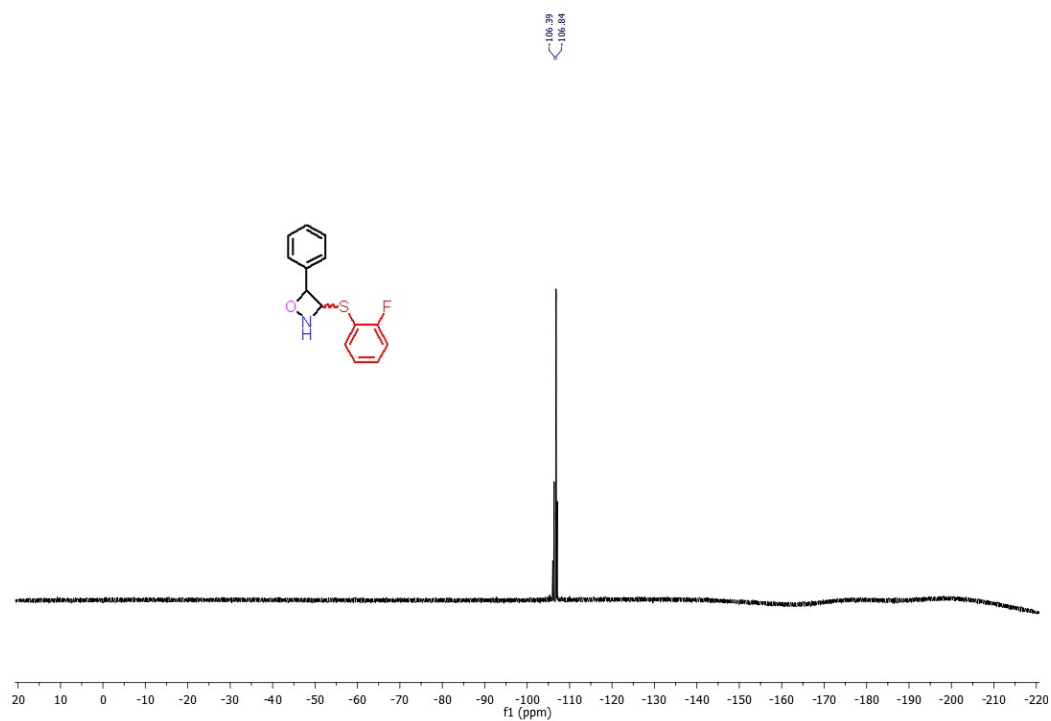

$^1\text{H}$ -NMR ( $\text{CDCl}_3$ , 400 MHz) Spectra of compound **29**

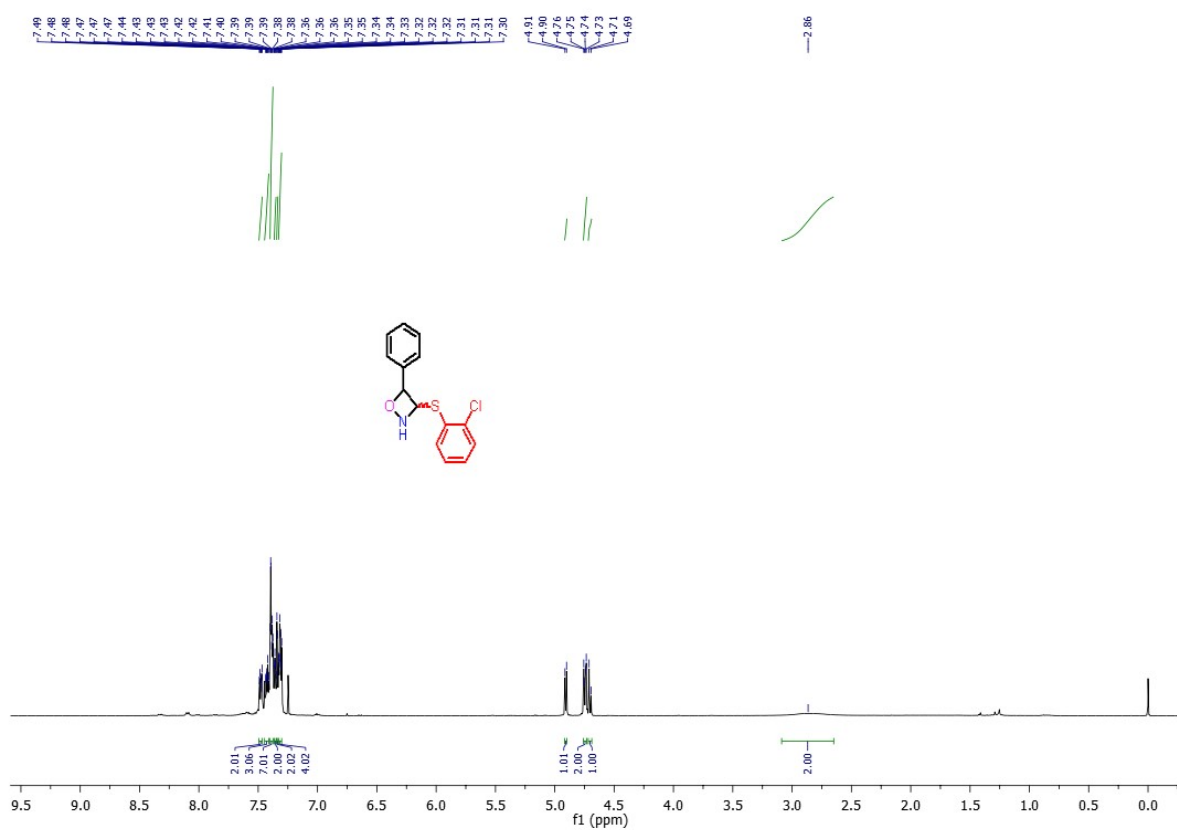

$^{13}\text{C}\{^1\text{H}\}$  NMR ( $\text{CDCl}_3$ , 125 MHz) spectra of compound **29**

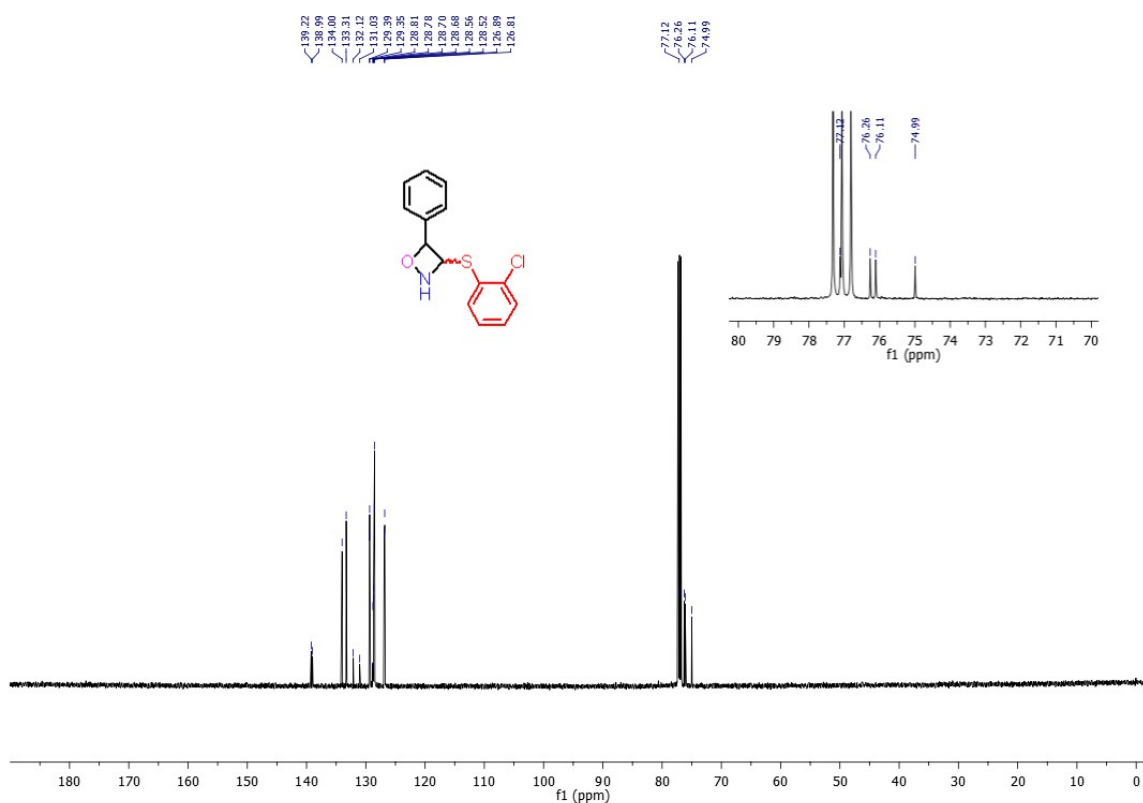

$^1\text{H}$ -NMR ( $\text{CDCl}_3$ , 400 MHz) Spectra of compound **30**

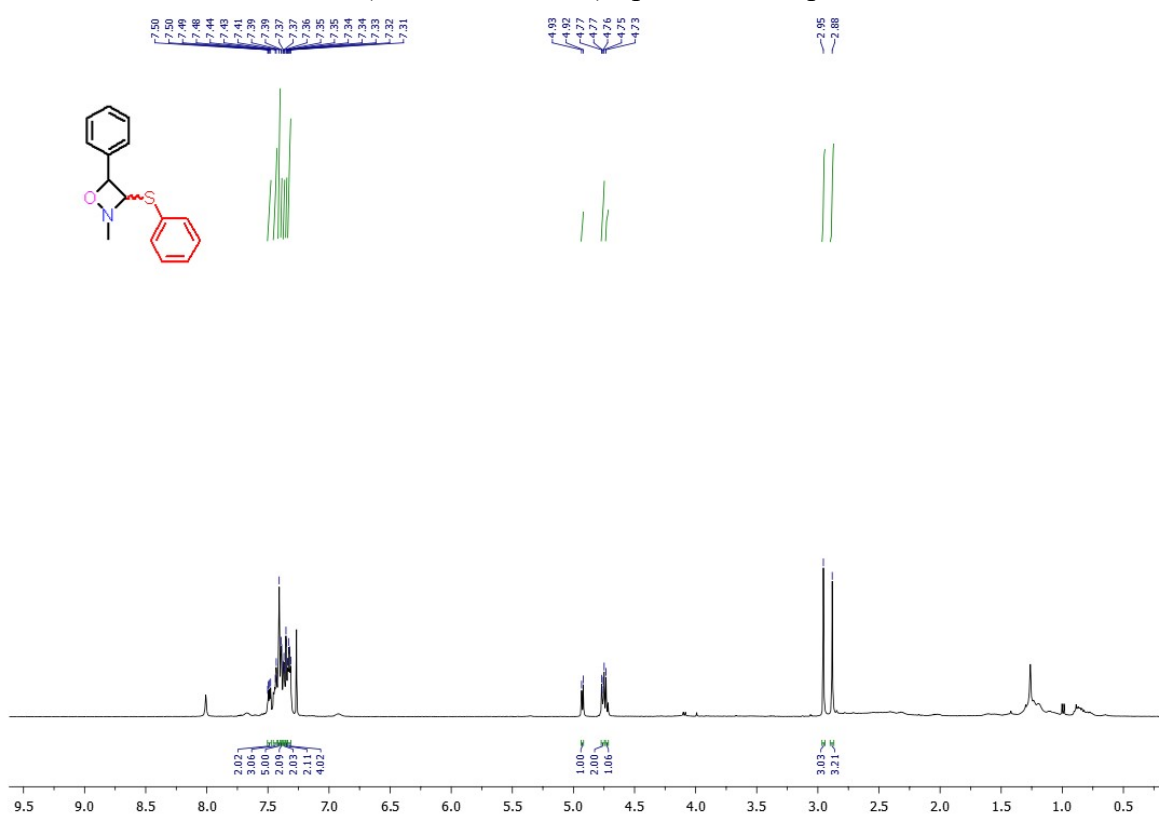

$^{13}\text{C}\{^1\text{H}\}$  NMR ( $\text{CDCl}_3$ , 125 MHz) spectra of compound **30**

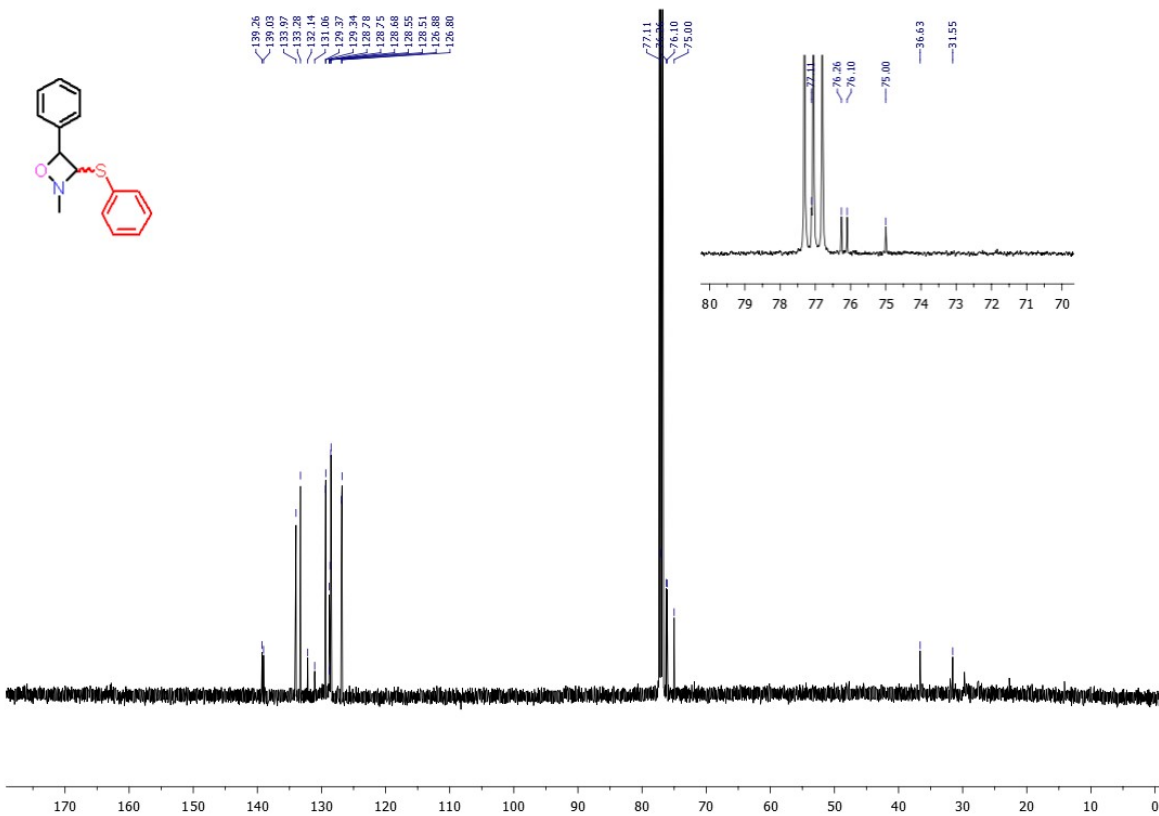

$^1\text{H}$ -NMR ( $\text{CDCl}_3$ , 400 MHz) Spectra of compound **31**

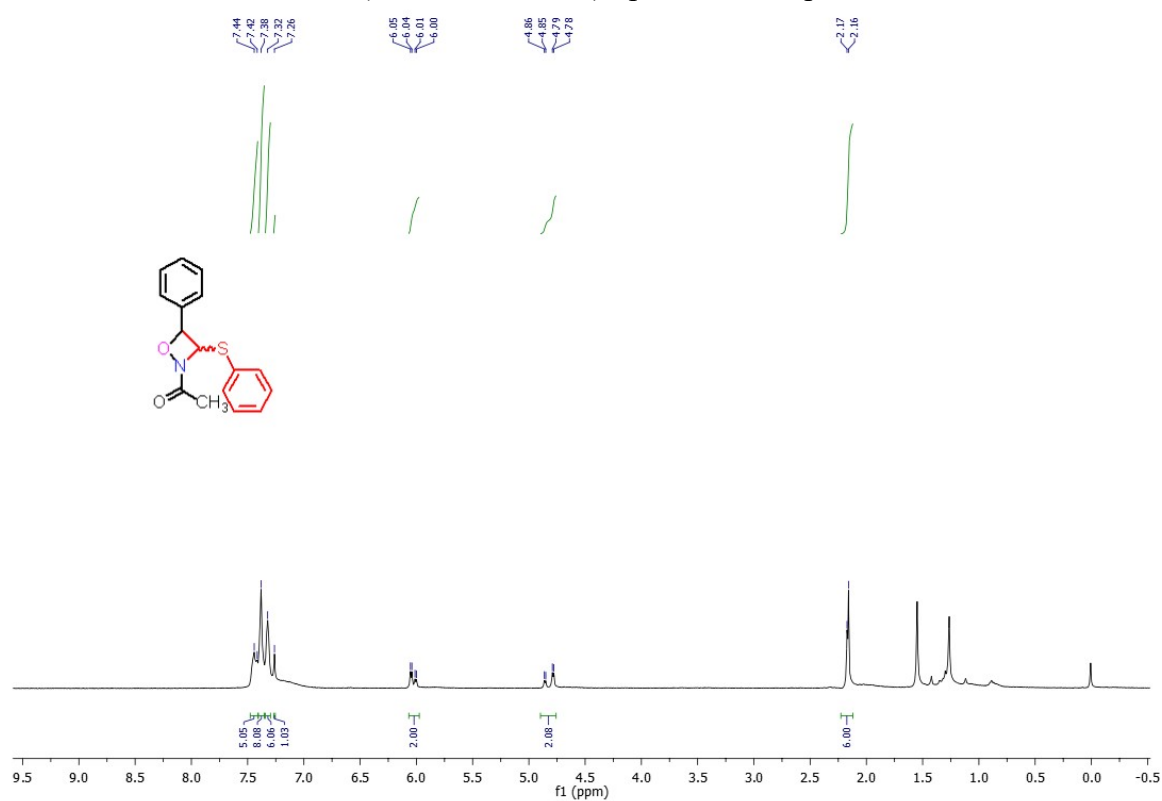

$^{13}\text{C}\{^1\text{H}\}$  NMR ( $\text{CDCl}_3$ , 125 MHz) spectra of compound **31**

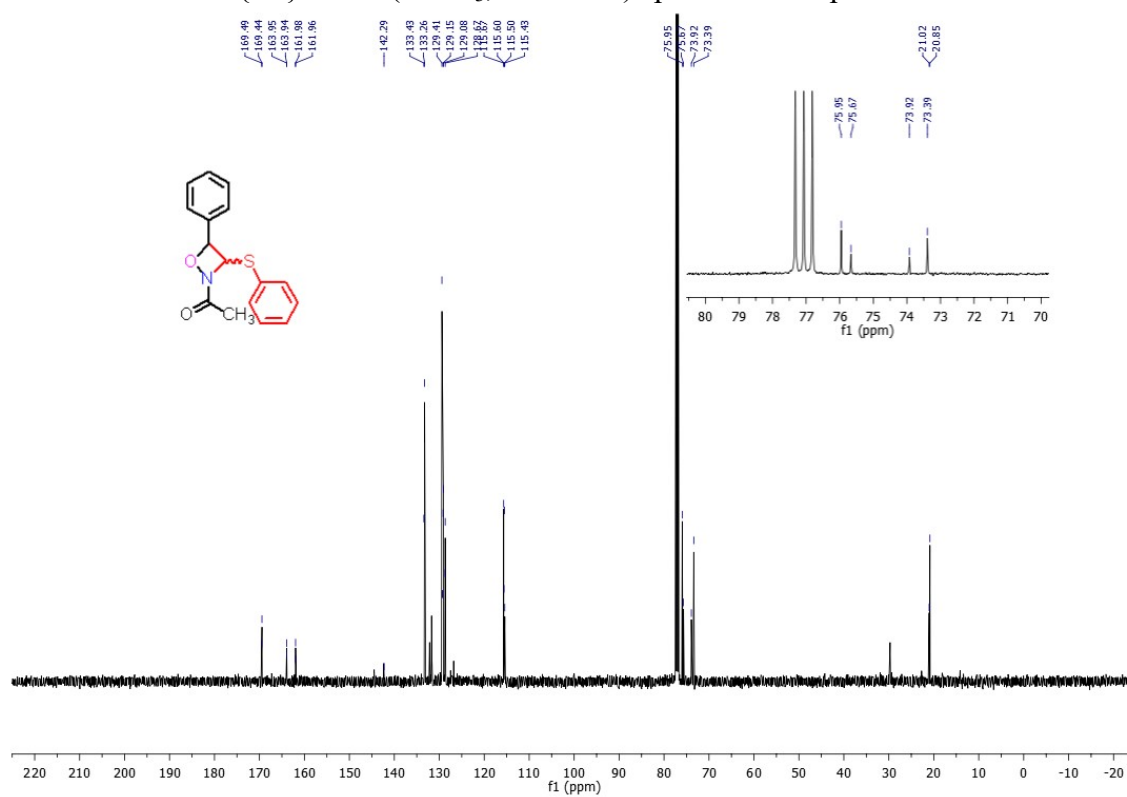

$^1\text{H}$ -NMR ( $\text{CDCl}_3$ , 400 MHz) Spectra of compound **32**

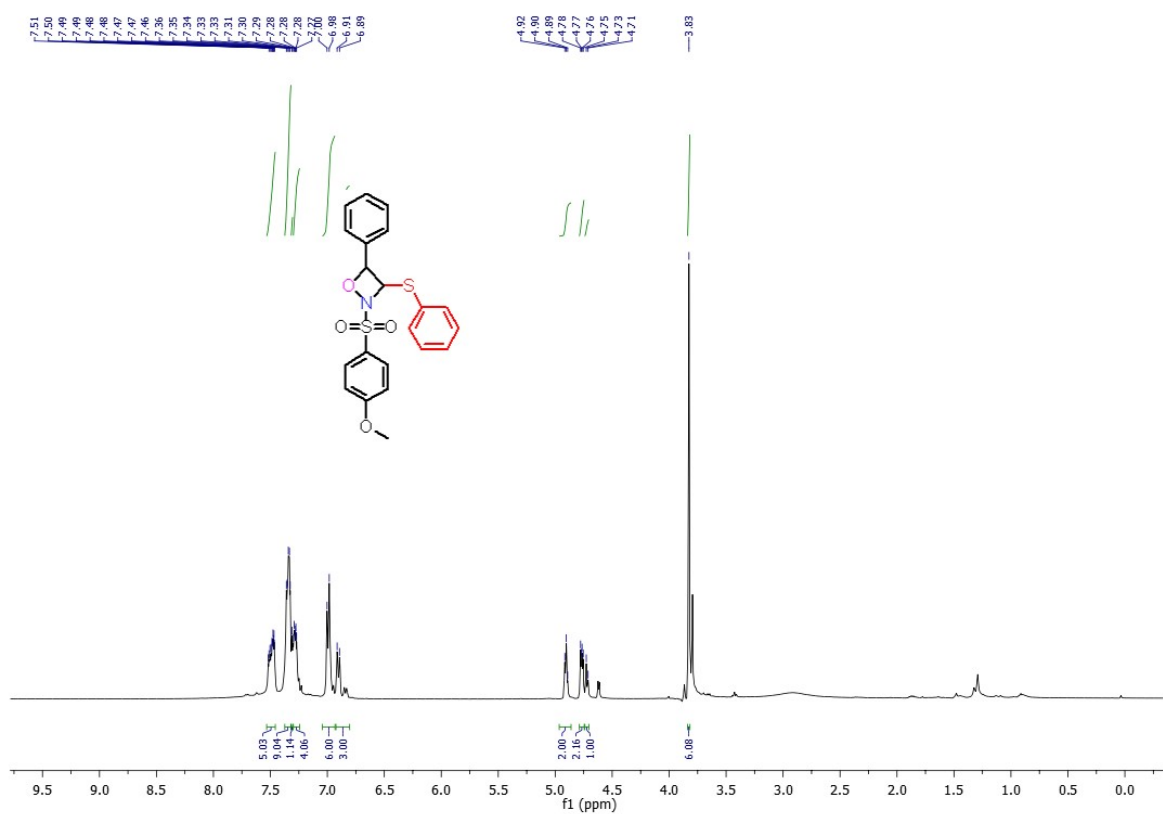

$^{13}\text{C}\{^1\text{H}\}$  NMR ( $\text{CDCl}_3$ , 125 MHz) spectra of compound **32**

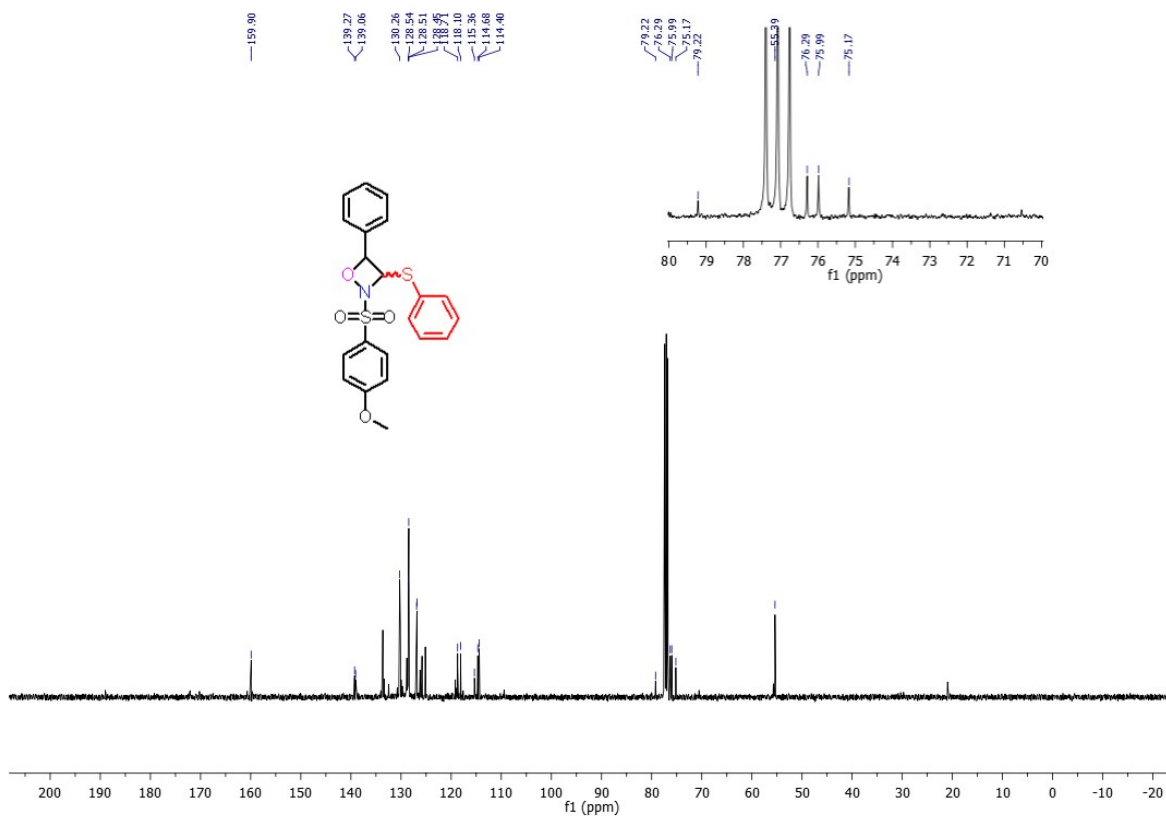

$^1\text{H}$ -NMR ( $\text{CDCl}_3$ , 400 MHz) Spectra of compound **33**

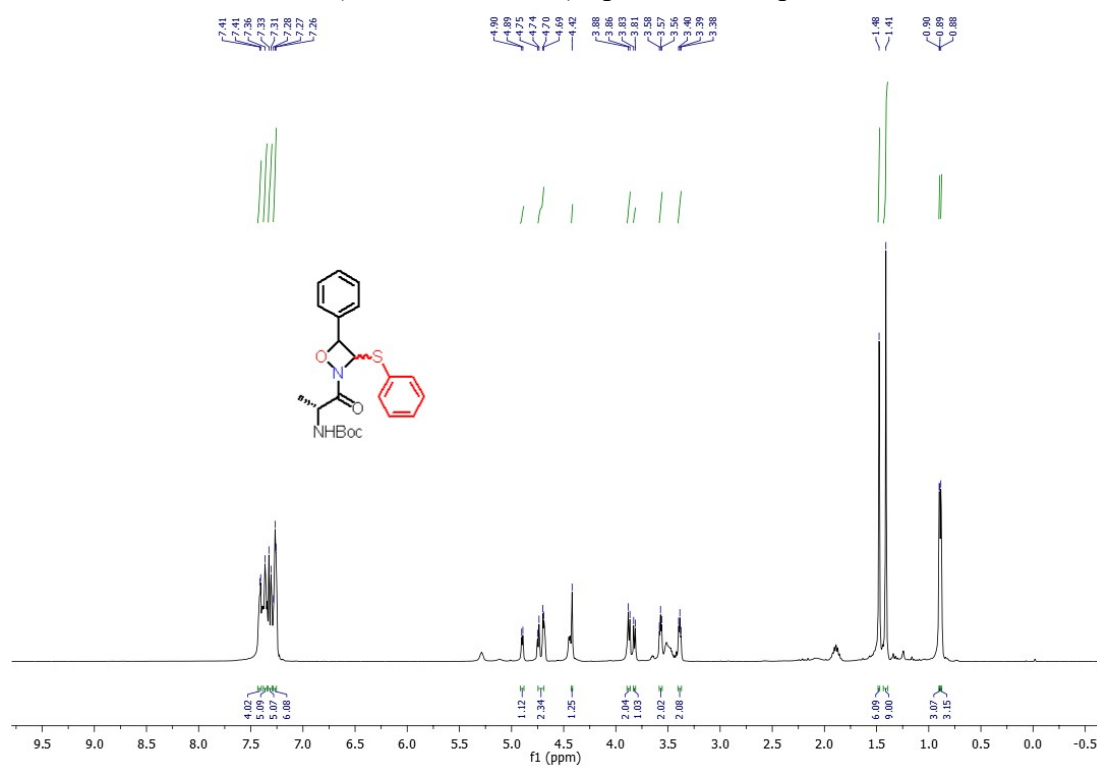

$^{13}\text{C}\{^1\text{H}\}$  NMR ( $\text{CDCl}_3$ , 100 MHz) spectra of compound **33**

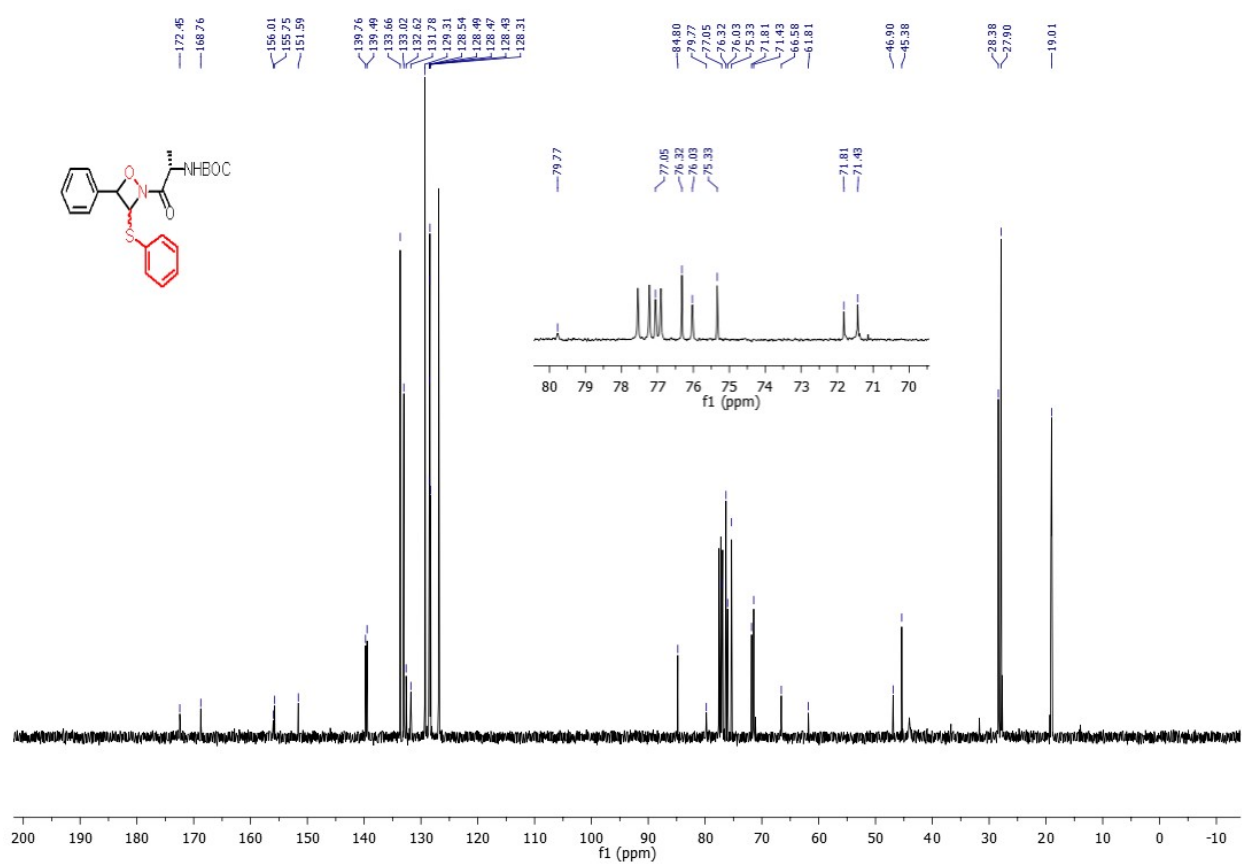

$^1\text{H}$ -NMR ( $\text{CDCl}_3$ , 400 MHz) Spectra of compound **1d**

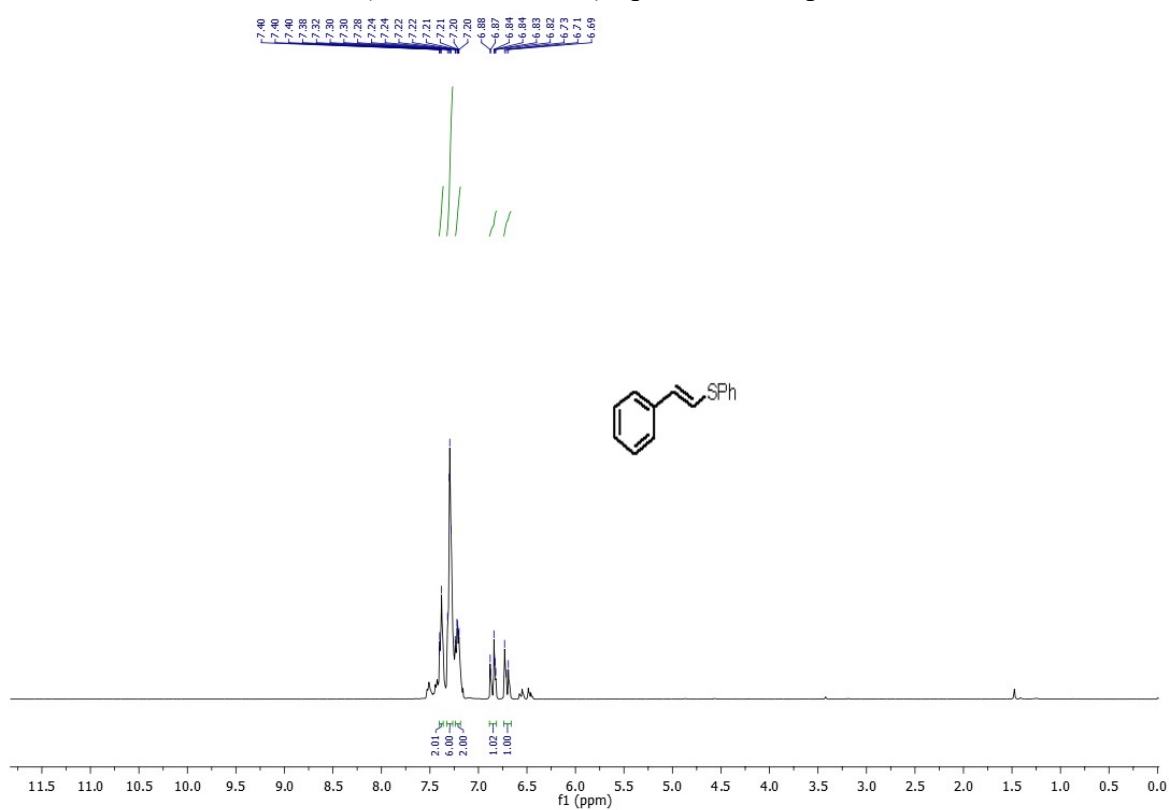

$^{13}\text{C}\{^1\text{H}\}$  NMR ( $\text{CDCl}_3$ , 100 MHz) spectra of compound **1d**

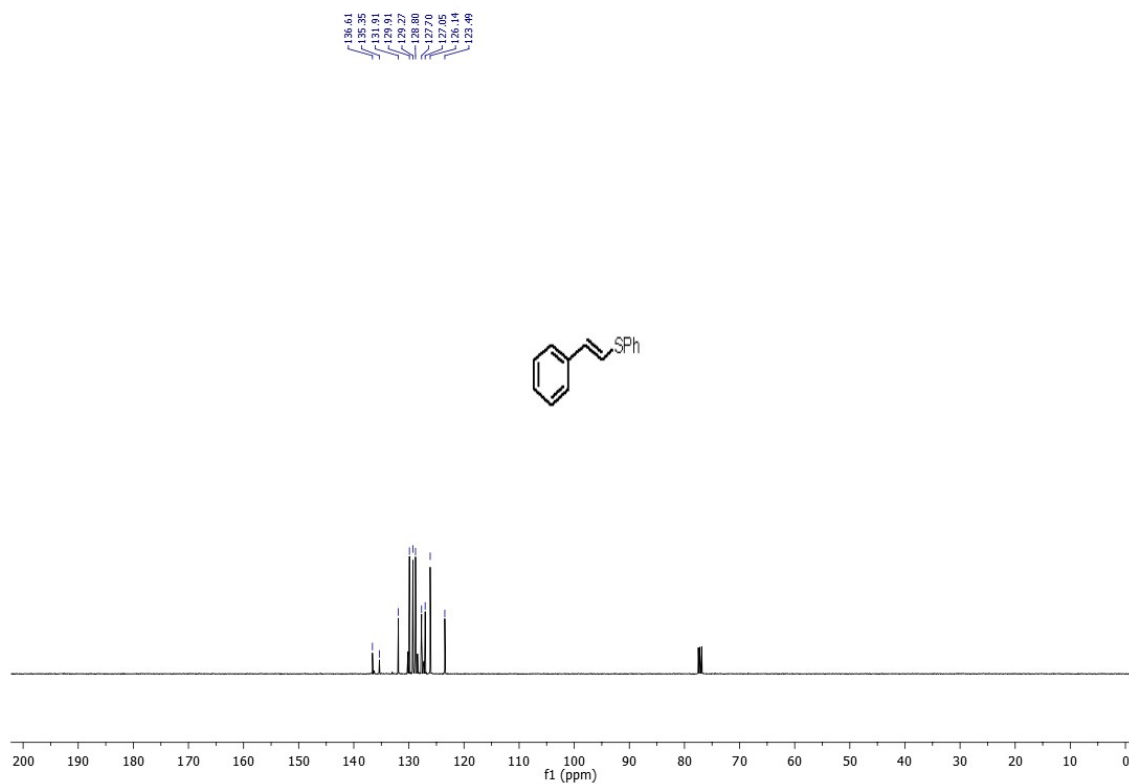

Chemical structure: O=C(O)[C@H]1CCN(C1)c2ccccc2S3C(=O)N(C3)c4ccccc4

<sup>1</sup>H NMR spectrum (ppm):

- 7.48, 7.47, 7.46, 7.45, 7.44, 7.43, 7.42, 7.41, 7.40, 7.39, 7.38, 7.37, 7.36, 7.35, 7.34, 7.33, 7.32, 7.31, 7.30, 7.29, 7.28, 7.27, 7.26, 7.25, 7.24, 7.23, 7.22, 7.21, 7.20, 7.19, 7.18, 7.17, 7.16, 7.15, 7.14, 7.13, 7.12, 7.11, 7.10, 7.09, 7.08, 7.07, 7.06, 7.05, 7.04, 7.03, 7.02, 7.01, 7.00, 6.99, 6.98, 6.97, 6.96, 6.95, 6.94, 6.93, 6.92, 6.91, 6.90, 6.89, 6.88, 6.87, 6.86, 6.85, 6.84, 6.83, 6.82, 6.81, 6.80, 6.79, 6.78, 6.77, 6.76, 6.75, 6.74, 6.73, 6.72, 6.71, 6.70, 6.69, 6.68, 6.67, 6.66, 6.65, 6.64, 6.63, 6.62, 6.61, 6.60, 6.59, 6.58, 6.57, 6.56, 6.55, 6.54, 6.53, 6.52, 6.51, 6.50, 6.49, 6.48, 6.47, 6.46, 6.45, 6.44, 6.43, 6.42, 6.41, 6.40, 6.39, 6.38, 6.37, 6.36, 6.35, 6.34, 6.33, 6.32, 6.31, 6.30, 6.29, 6.28, 6.27, 6.26, 6.25, 6.24, 6.23, 6.22, 6.21, 6.20, 6.19, 6.18, 6.17, 6.16, 6.15, 6.14, 6.13, 6.12, 6.11, 6.10, 6.09, 6.08, 6.07, 6.06, 6.05, 6.04, 6.03, 6.02, 6.01, 6.00, 5.99, 5.98, 5.97, 5.96, 5.95, 5.94, 5.93, 5.92, 5.91, 5.90, 5.89, 5.88, 5.87, 5.86, 5.85, 5.84, 5.83, 5.82, 5.81, 5.80, 5.79, 5.78, 5.77, 5.76, 5.75, 5.74, 5.73, 5.72, 5.71, 5.70, 5.69, 5.68, 5.67, 5.66, 5.65, 5.64, 5.63, 5.62, 5.61, 5.60, 5.59, 5.58, 5.57, 5.56, 5.55, 5.54, 5.53, 5.52, 5.51, 5.50, 5.49, 5.48, 5.47, 5.46, 5.45, 5.44, 5.43, 5.42, 5.41, 5.40, 5.39, 5.38, 5.37, 5.36, 5.35, 5.34, 5.33, 5.32, 5.31, 5.30, 5.29, 5.28, 5.27, 5.26, 5.25, 5.24, 5.23, 5.22, 5.21, 5.20, 5.19, 5.18, 5.17, 5.16, 5.15, 5.14, 5.13, 5.12, 5.11, 5.10, 5.09, 5.08, 5.07, 5.06, 5.05, 5.04, 5.03, 5.02, 5.01, 5.00, 4.99, 4.98, 4.97, 4.96, 4.95, 4.94, 4.93, 4.92, 4.91, 4.90, 4.89, 4.88, 4.87, 4.86, 4.85, 4.84, 4.83, 4.82, 4.81, 4.80, 4.79, 4.78, 4.77, 4.76, 4.75, 4.74, 4.73, 4.72, 4.71, 4.70, 4.69, 4.68, 4.67, 4.66, 4.65, 4.64, 4.63, 4.62, 4.61, 4.60, 4.59, 4.58, 4.57, 4.56, 4.55, 4.54, 4.53, 4.52, 4.51, 4.50, 4.49, 4.48, 4.47, 4.46, 4.45, 4.44, 4.43, 4.42, 4.41, 4.40, 4.39, 4.38, 4.37, 4.36, 4.35, 4.34, 4.33, 4.32, 4.31, 4.30, 4.29, 4.28, 4.27, 4.26, 4.25, 4.24, 4.23, 4.22, 4.21, 4.20, 4.19, 4.18, 4.17, 4.16, 4.15, 4.14, 4.13, 4.12, 4.11, 4.10, 4.09, 4.08, 4.07, 4.06, 4.05, 4.04, 4.03, 4.02, 4.01, 4.00, 3.99, 3.98, 3.97, 3.96, 3.95, 3.94, 3.93, 3.92, 3.91, 3.90, 3.89, 3.88, 3.87, 3.86, 3.85, 3.84, 3.83, 3.82, 3.81, 3.80, 3.79, 3.78, 3.77, 3.76, 3.75, 3.74, 3.73, 3.72, 3.71, 3.70, 3.69, 3.68, 3.67, 3.66, 3.65, 3.64, 3.63, 3.62, 3.61, 3.60, 3.59, 3.58, 3.57, 3.56, 3.55, 3.54, 3.53, 3.52, 3.51, 3.50, 3.49, 3.48, 3.47, 3.46, 3.45, 3.44, 3.43, 3.42, 3.41, 3.40, 3.39, 3.38, 3.37, 3.36, 3.35, 3.34, 3.33, 3.32, 3.31, 3.30, 3.29, 3.28, 3.27, 3.26, 3.25, 3.24, 3.23, 3.22, 3.21, 3.20, 3.19, 3.18, 3.17, 3.16, 3.15, 3.14, 3.13, 3.12, 3.11, 3.10, 3.09, 3.08, 3.07, 3.06, 3.05, 3.04, 3.03, 3.02, 3.01, 3.00, 2.99, 2.98, 2.97, 2.96, 2.95, 2.94, 2.93, 2.92, 2.91, 2.90, 2.89, 2.88, 2.87, 2.86, 2.85, 2.84, 2.83, 2.82, 2.81, 2.80, 2.79, 2.78, 2.77, 2.76, 2.75, 2.74, 2.73, 2.72, 2.71, 2.70, 2.69, 2.68, 2.67, 2.66, 2.65, 2.64, 2.63, 2.62, 2.61, 2.60, 2.59, 2.58, 2.57, 2.56, 2.55, 2.54, 2.53, 2.52, 2.51, 2.50, 2.49, 2.48, 2.47, 2.46, 2.45, 2.44, 2.43, 2.42, 2.41, 2.40, 2.39, 2.38, 2.37, 2.36, 2.35, 2.34, 2.33, 2.32, 2.31, 2.30, 2.29, 2.28, 2.27, 2.26, 2.25, 2.24, 2.23, 2.22, 2.21, 2.20, 2.19, 2.18, 2.17, 2.16, 2.15, 2.14, 2.13, 2.12, 2.11, 2.10, 2.09, 2.08, 2.07, 2.06, 2.05, 2.04, 2.03, 2.02, 2.01, 2.00, 1.99, 1.98, 1.97, 1.96, 1.95, 1.94, 1.93, 1.92, 1.91, 1.90, 1.89, 1.88, 1.87, 1.86, 1.85, 1.84, 1.83, 1.82, 1.81, 1.80, 1.79, 1.78, 1.77, 1.76, 1.75, 1.74, 1.73, 1.72, 1.71, 1.70, 1.69, 1.68, 1.67, 1.66, 1.65, 1.64, 1.63, 1.62, 1.61, 1.60, 1.59, 1.58, 1.57, 1.56, 1.55, 1.54, 1.53, 1.52, 1.51, 1.50, 1.49, 1.48, 1.47, 1.46, 1.45, 1.44, 1.43, 1.42, 1.41, 1.40, 1.39, 1.38, 1.37, 1.36, 1.35, 1.34, 1.33, 1.32, 1.31, 1.30, 1.29, 1.28, 1.27, 1.26, 1.25, 1.24, 1.23, 1.22, 1.21, 1.2

$^1\text{H}$ -NMR ( $\text{CDCl}_3$ , 400 MHz) Spectra of compound **35**

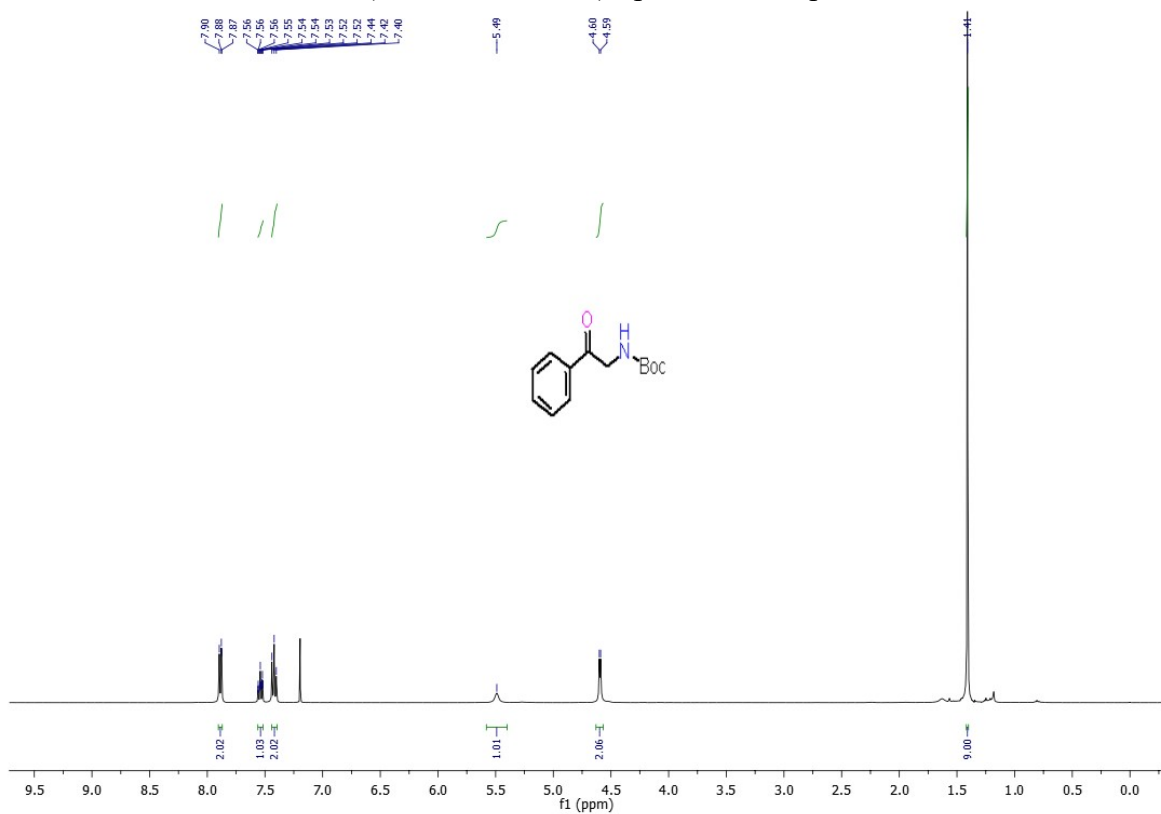

$^{13}\text{C}\{^1\text{H}\}$  NMR ( $\text{CDCl}_3$ , 100 MHz) spectra of compound **35**

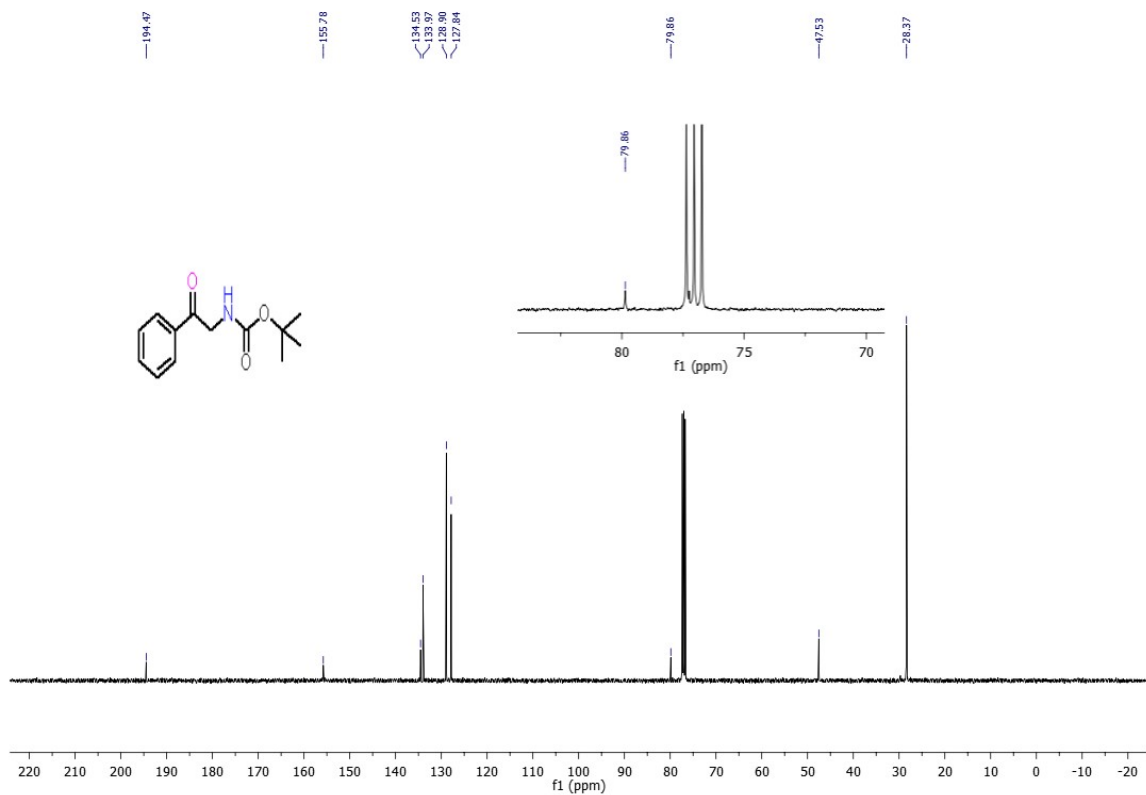

$^1\text{H}$ -NMR ( $\text{CDCl}_3$ , 400 MHz) Spectra of compound **1h**

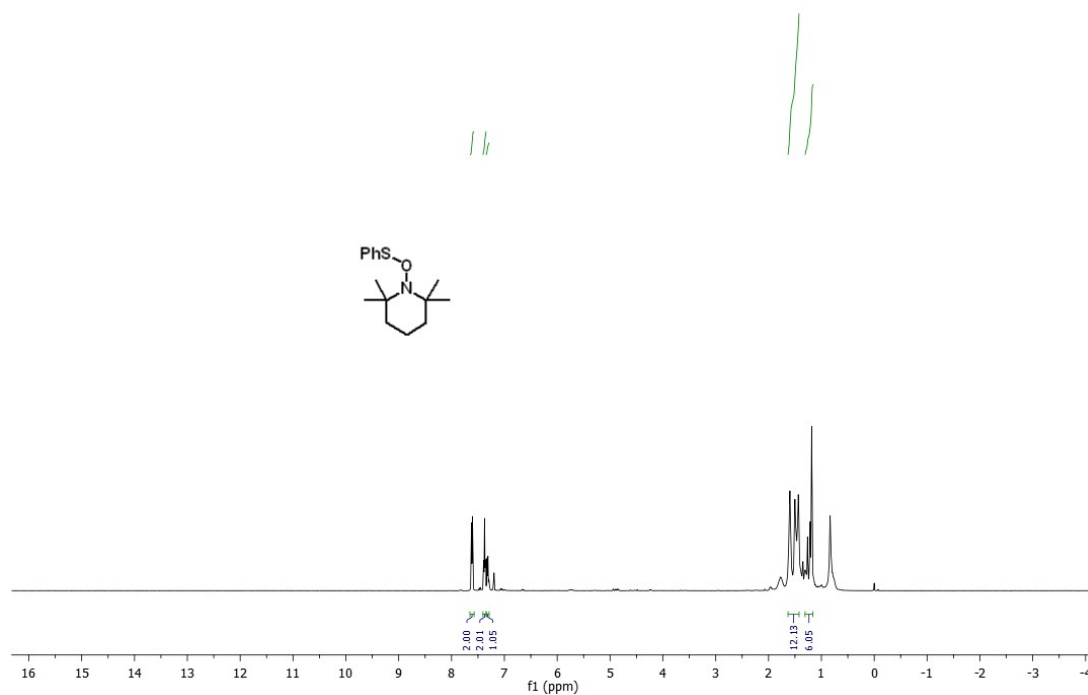

$^{13}\text{C}\{^1\text{H}\}$  NMR ( $\text{CDCl}_3$ , 100 MHz) spectra of compound **1h**

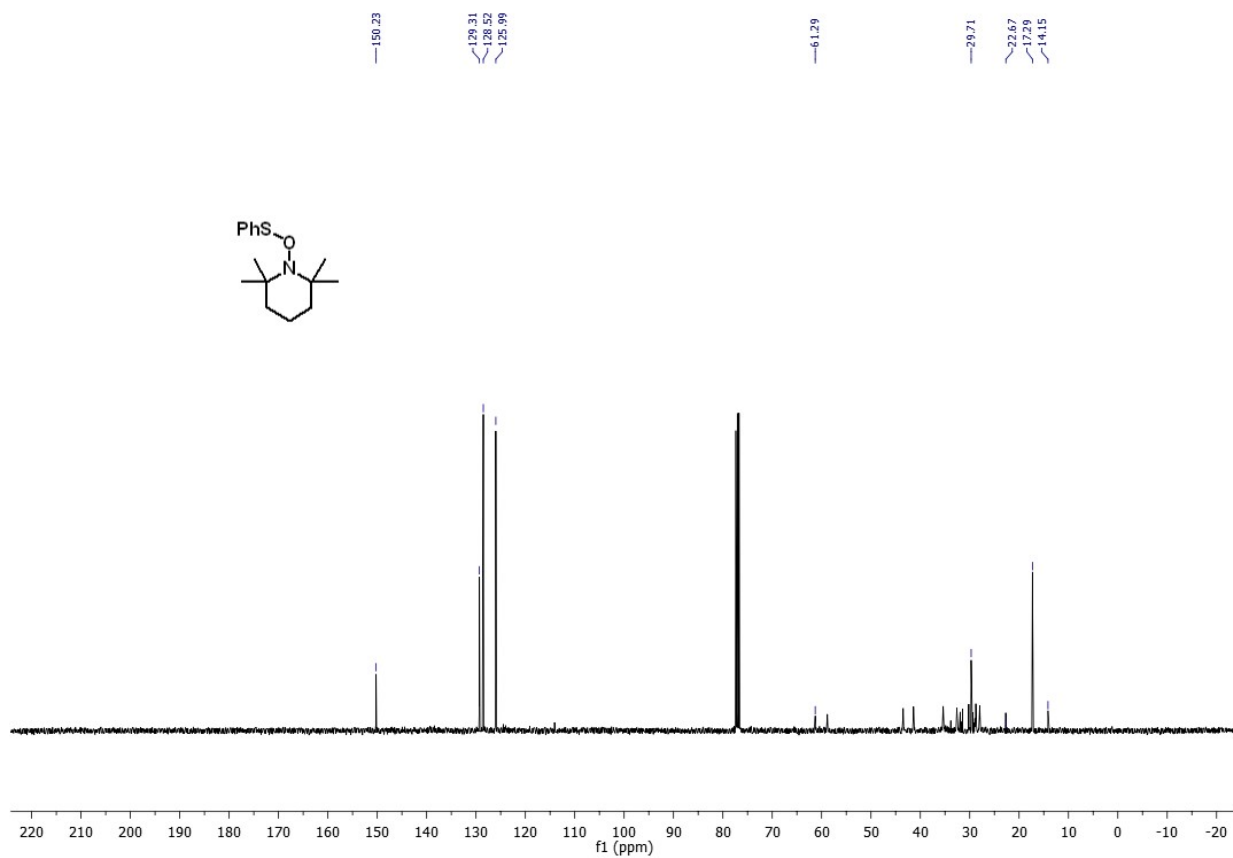

Supplement: d2cc02892a1.pdf [file d2cc02892a1.pdf]
